# Supplementary material for: Structure–gelation property relationships of phenolic glycosides of pentose sugars: pH dependent controlled release of curcumin
Source: Royal Society of Chemistry journal article supplement (doi:10.1039/d1ma00907a), 2022-01-01

## Electronic Supporting Information

### **Structure-gelation property relations of phenolic glycosides of pentose sugars: pH dependent controlled release of curcumin**

Navendu P. Pathak<sup>a</sup> Arunava Sengupta,<sup>b</sup> and Somnath Yadav<sup>\*a</sup>

*<sup>a</sup>Department of Chemistry, Indian Institute of Technology(ISM), Dhanbad, 826004, Jharkhand, India.*

*<sup>b</sup>Department of Chemistry, Techno India University, Kolkata 700091, West Bengal, India.*

**Table – S1.** Gelation studies of compounds **2a**, **2c**, **2'a-d**, **3a-d**, **3'b** and **3'c** in various solvents.<sup>a</sup>

| Solvent                 | (MGC, <sup>b</sup> T <sub>g</sub> <sup>c</sup> ) |    |     |     |     |     |    |    |    |    |     |     |
|-------------------------|--------------------------------------------------|----|-----|-----|-----|-----|----|----|----|----|-----|-----|
|                         | 2a                                               | 2c | 2'a | 2'b | 2'c | 2'd | 3a | 3b | 3c | 3d | 3'b | 3'c |
| Benzene                 | PG                                               | PS | PP  | PP  | PP  | PP  | PS | PP | PP | PP | PP  | PP  |
| Toluene                 | PG                                               | PS | PS  | PS  | PS  | PS  | PS | PS | PS | PS | PS  | PS  |
| <i>o</i> -xylene        | PS                                               | PS | PS  | PS  | PS  | PS  | PP | PP | PP | PP | PS  | PS  |
| <i>m</i> -xylene        | PS                                               | PS | PS  | PS  | PS  | PS  | PP | PP | PP | PP | PS  | PS  |
| <i>p</i> -xylene        | PS                                               | PS | PS  | PS  | PS  | PS  | PP | PP | PP | PP | PS  | PS  |
| Chlorobenzene           | PG                                               | PS | PS  | PS  | PS  | PS  | PG | PS | PS | PS | PS  | PS  |
| Amyl alcohol            | S                                                | S  | S   | S   | S   | S   | S  | S  | S  | S  | S   | S   |
| <i>n</i> -butyl alcohol | S                                                | S  | S   | S   | S   | S   | S  | S  | S  | S  | S   | S   |
| Methanol                | S                                                | S  | S   | S   | S   | S   | S  | S  | S  | S  | S   | S   |
| Ethanol                 | S                                                | S  | S   | S   | S   | S   | S  | S  | S  | S  | S   | S   |
| Water                   | S                                                | S  | S   | S   | S   | S   | S  | S  | S  | S  | S   | S   |
| DMF                     | S                                                | S  | S   | S   | S   | S   | S  | S  | S  | S  | S   | S   |
| DMSO                    | S                                                | S  | S   | S   | S   | S   | S  | S  | S  | S  | S   | S   |
| Coconut Oil             | PP                                               | PP | PP  | PP  | PP  | PP  | PP | PP | PP | PP | PP  | PP  |
| Mustard Oil             | PP                                               | PP | PP  | PP  | PP  | PP  | PP | PP | PP | PP | PP  | PP  |
| Olive Oil               | PP                                               | PP | PP  | PP  | PP  | PP  | PP | PP | PP | PP | PP  | PP  |

<sup>a</sup>G = Gel; PG = Partial Gel; S = Solution; PS = Partial soluble; <sup>b</sup>MGC = Minimum Gelation Concentration % (w/v). <sup>c</sup>T<sub>g</sub> = Gelation temperature.

**Table – S2.** Gelation studies of compounds **4a-d**, **4'a-d** and **5a-d** in various solvents.<sup>a</sup>

| Solvent                 | (MGC, <sup>b</sup> T <sub>g</sub> <sup>c</sup> ) |    |    |    |     |     |     |     |    |    |    |    |
|-------------------------|--------------------------------------------------|----|----|----|-----|-----|-----|-----|----|----|----|----|
|                         | 4a                                               | 4b | 4c | 4d | 4'a | 4'b | 4'c | 4'd | 5a | 5b | 5c | 5d |
| Benzene                 | PS                                               | PS | PS | PS | PS  | PS  | PS  | PS  | PS | PS | PS | PS |
| Toluene                 | S                                                | S  | S  | S  | S   | S   | S   | S   | S  | S  | S  | S  |
| <i>o</i> -xylene        | PP                                               | PP | PP | PP | PP  | PP  | PP  | PP  | PP | PP | PP | PP |
| <i>m</i> -xylene        | PP                                               | PP | PP | PP | PP  | PP  | PP  | PP  | PP | PP | PP | PP |
| <i>p</i> -xylene        | PP                                               | PP | PP | PP | PP  | PP  | PP  | PP  | PP | PP | PP | PP |
| Chlorobenzene           | PG                                               | PP | PP | PP | PP  | PP  | PP  | PP  | PP | PP | PP | PP |
| Amyl alcohol            | S                                                | S  | S  | S  | S   | S   | S   | S   | S  | S  | S  | S  |
| <i>n</i> -butyl alcohol | S                                                | S  | S  | S  | S   | S   | S   | S   | S  | S  | S  | S  |
| Methanol                | S                                                | S  | S  | S  | S   | S   | S   | S   | S  | S  | S  | S  |
| Ethanol                 | S                                                | S  | S  | S  | S   | S   | S   | S   | S  | S  | S  | S  |
| Water                   | S                                                | S  | S  | S  | S   | S   | S   | S   | S  | S  | S  | S  |
| DMF                     | S                                                | S  | S  | S  | S   | S   | S   | S   | S  | S  | S  | S  |
| DMSO                    | S                                                | S  | S  | S  | S   | S   | S   | S   | S  | S  | S  | S  |
| Coconut Oil             | PP                                               | PP | PP | PP | PP  | PP  | PP  | PP  | PP | PP | PP | PP |
| Mustard Oil             | PP                                               | PP | PP | PP | PP  | PP  | PP  | PP  | PP | PP | PP | PP |
| Olive Oil               | PP                                               | PP | PP | PP | PP  | PP  | PP  | PP  | PP | PP | PP | PP |

<sup>a</sup>G = Gel; PG = Partial Gel; S = Solution; PS = Partial soluble; <sup>b</sup>MGC = Minimum Gelation Concentration % (w/v). <sup>c</sup>T<sub>g</sub> = Gelation temperature.

## Figures and graphs

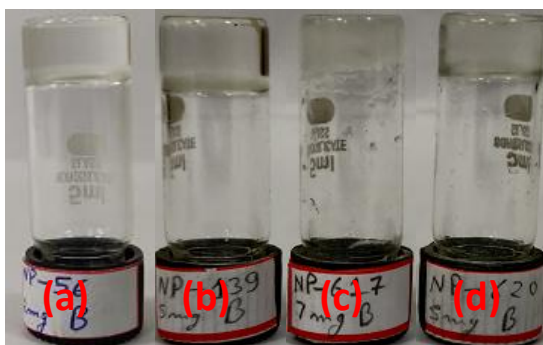

**Figure S1.** Gels from benzene (a) **2b** (0.2% w/v), (b) **2d** (0.3% w/v), (c) **3'a** (0.7% w/v), (d) **3'd** (0.3% w/v).

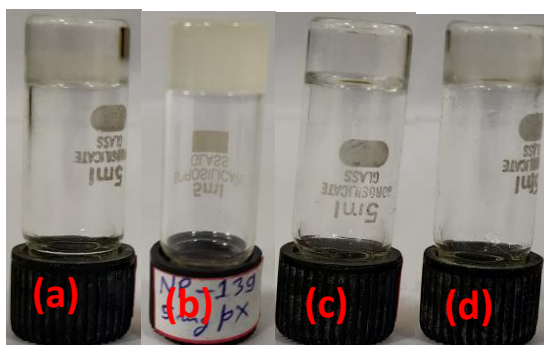

**Figure S2.** Gels from *p*-xylene (a) **2b** (0.2% w/v), (b) **2d** (0.5% w/v), (c) **3'a** (0.8% w/v), (d) **3'd** (0.3% w/v).

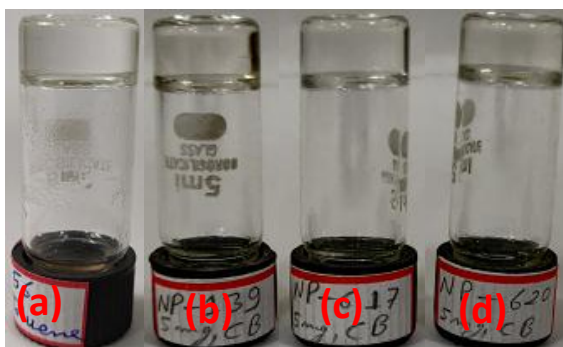

**Figure S3.** Gels from Chlorobenzene (a) **2b** (0.2% w/v), (b) **2d** (0.5% w/v), (c) **3'a** (0.5% w/v), (d) **3'd** (0.5% w/v).

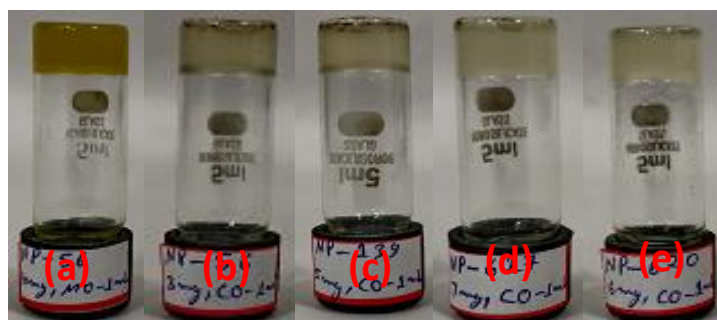

**Figure S4.** Gels (a) **2b** in mustard oil (1% w/v), (b) **2b** in coconut oil (0.3% w/v), (c) **2d** in coconut oil (0.5% w/v), (d) **3'a** in coconut oil (0.6% w/v), (e) **3'd** in coconut oil (0.5% w/v).

## Rheology

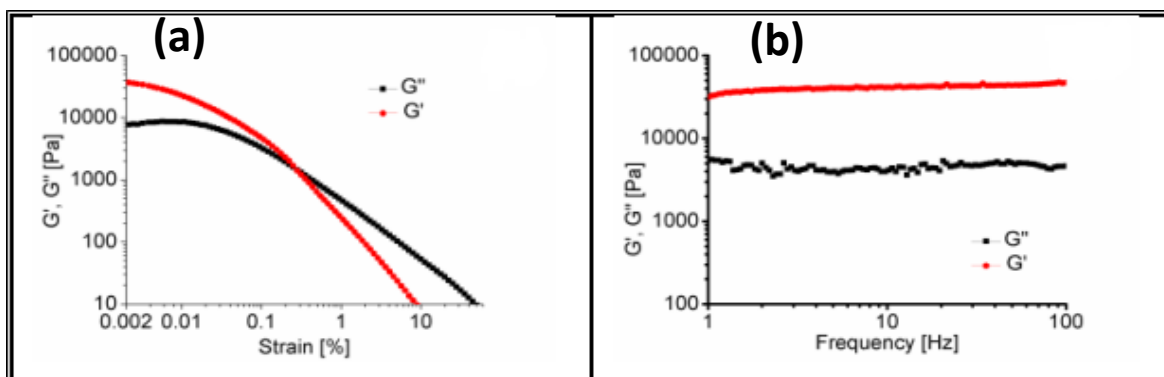

**Figure S5.** (a) DSS curve of **2b** gel with *p*-xylene at 1.0% (w/v) at frequency 1 Hz and temperature 25 °C (b) DFS curve of **2b** gel with *p*-xylene at 1.0% (w/v) at strain 0.001% and temperature 25°C.

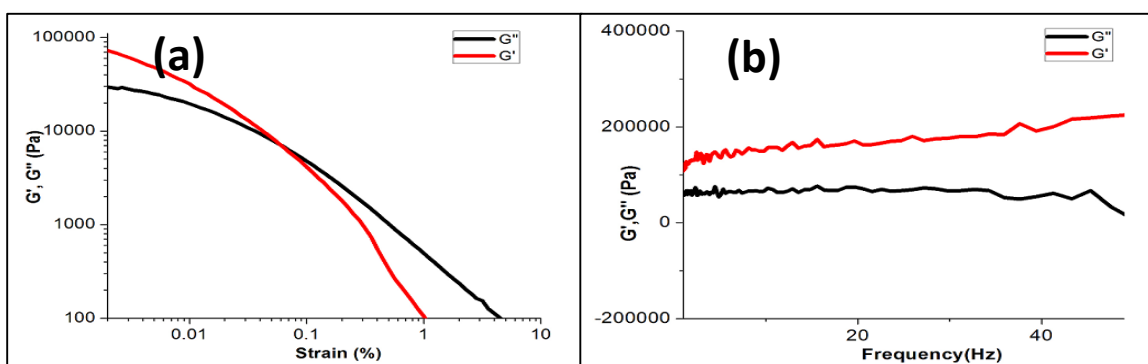

**Figure S6.** (a) DSS curve of **2d** gel with *p*-xylene at 1.0% (w/v) at frequency 1 Hz and temperature 25 °C (b) DFS curve of **2d** gel with *p*-xylene at 1.0% (w/v) at strain 0.001% and temperature 25°C.

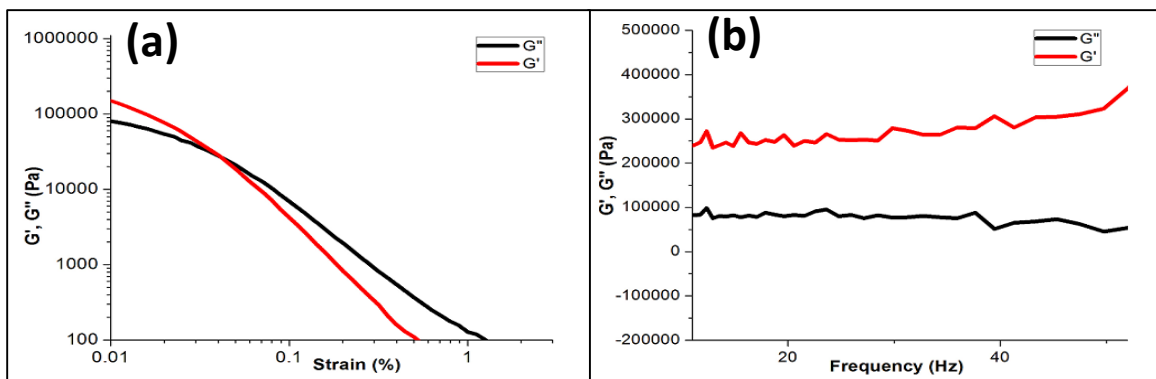

**Figure S7.** (a) DSS curve of **3'a** gel with *p*-xylene at 1.0% (w/v) at frequency 1 Hz and temperature 25 °C (b) DFS curve of **3'a** gel with *p*-xylene at 1.0% (w/v) at strain 0.001% and temperature 25°C.

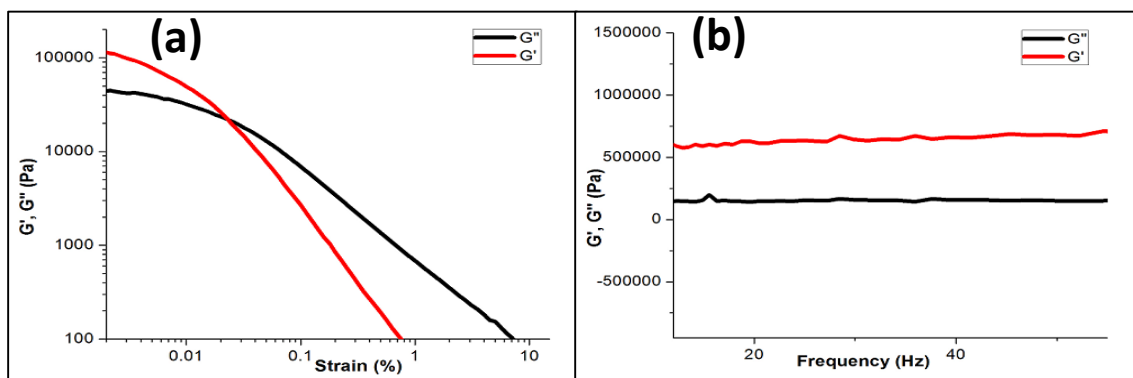

**Figure S8.** (a) DSS curve of **3'd** gel with *p*-xylene at 1.0% (w/v) at frequency 1 Hz and temperature 25 °C (b) DFS curve of **3'd** gel with *p*-xylene at 1.0% (w/v) at strain 0.001% and temperature 25 °C.

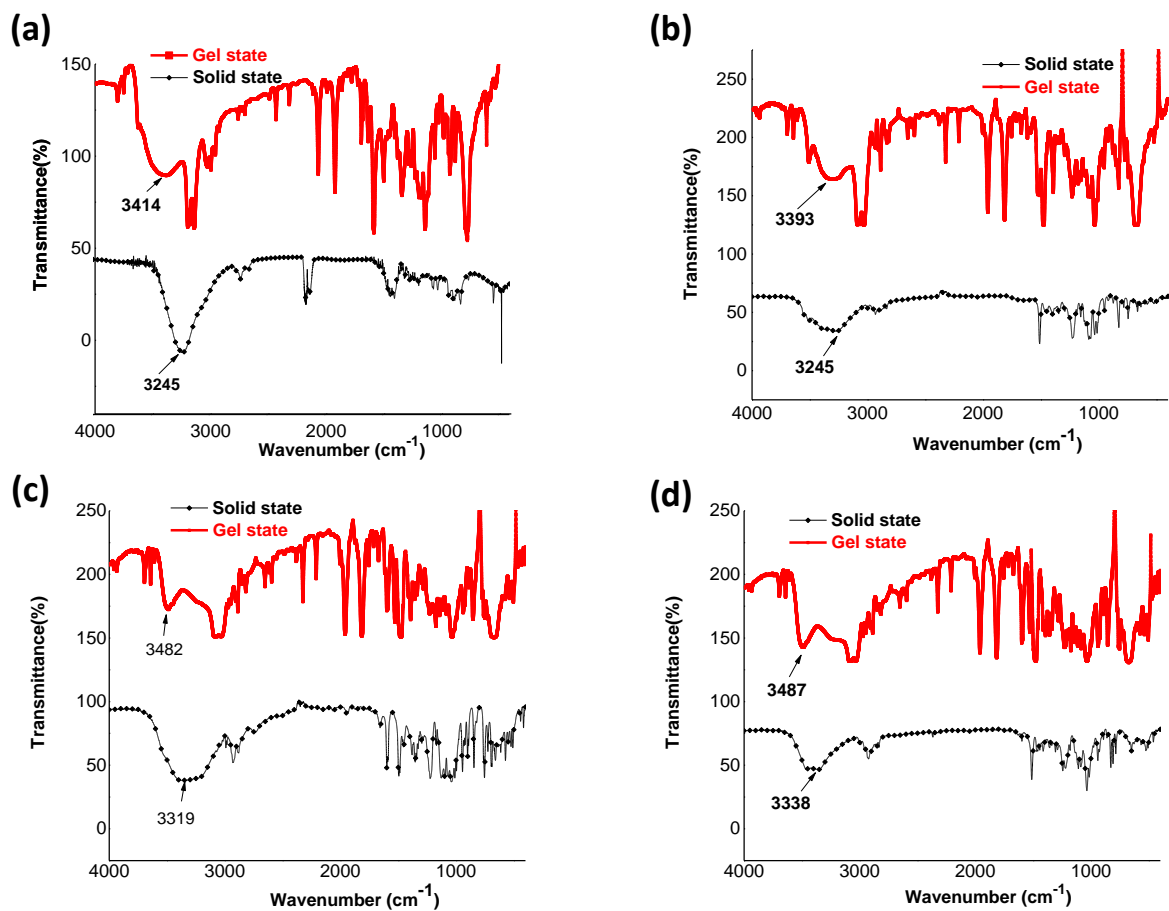

**Figure S9.** FTIR spectra of crystalline (black) and benzene gels (red) of (a) **2b** (b) **2d** (c) **3'a** (d) **3'd**. The shifts of the OH stretching frequencies for the gelators in their respective crystalline and gel states are shown.

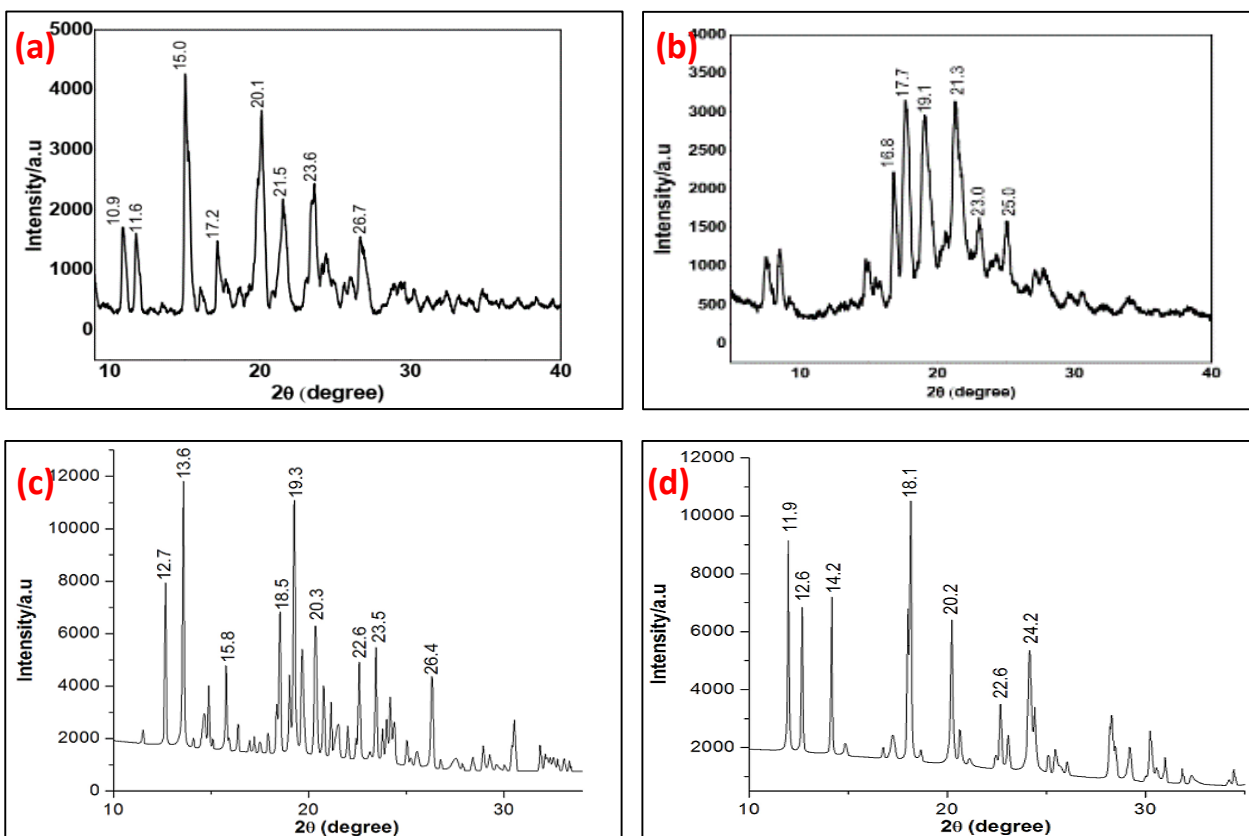

Figure S10. WXR D diffractograms of *p*-xylene xerogel of (a) **2b** (b) **2d** (c) **3'a** and (d) **3'd**.

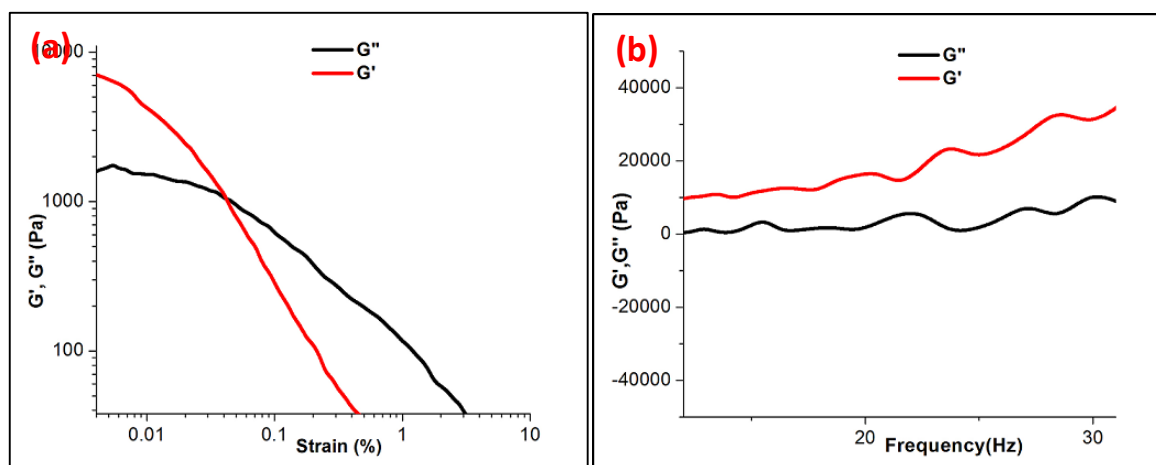

Figure S11. (a) DSS curve of **2b** gel with mustard oil at 1.5% (w/v) at frequency 1 Hz and temperature 25 °C (b) DFS curve **2b** gel with mustard oil at 1.5% (w/v) at strain 0.001% and temperature 25 °C.

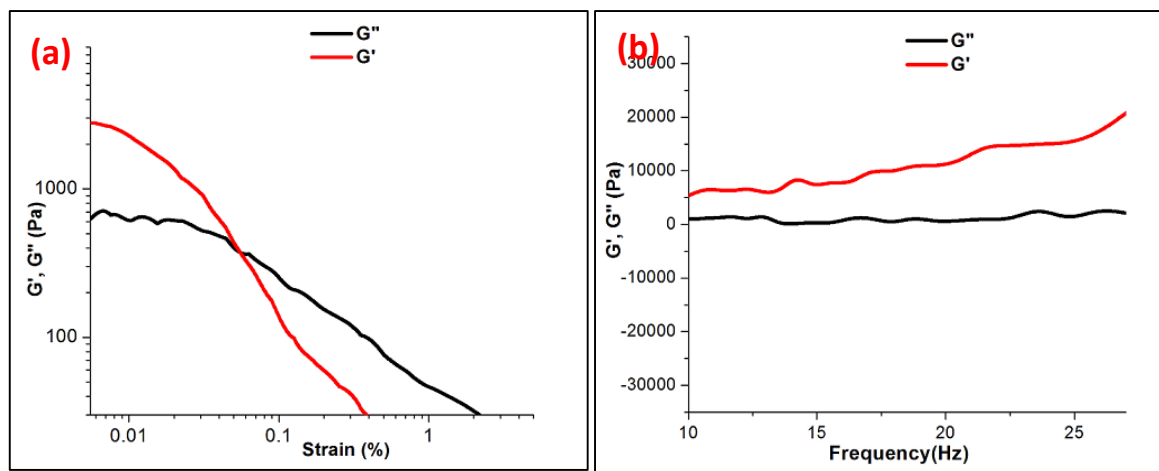

**Figure S12.** (a) DSS curve of  $2b$ +Cur gel with mustard oil at 1.5% (w/v) at frequency 1 Hz and temperature 25 °C (b) DFS curve  $2b$ +Cur gel with mustard oil at 1.5% (w/v) at strain 0.001% and temperature 25°C.



(a)

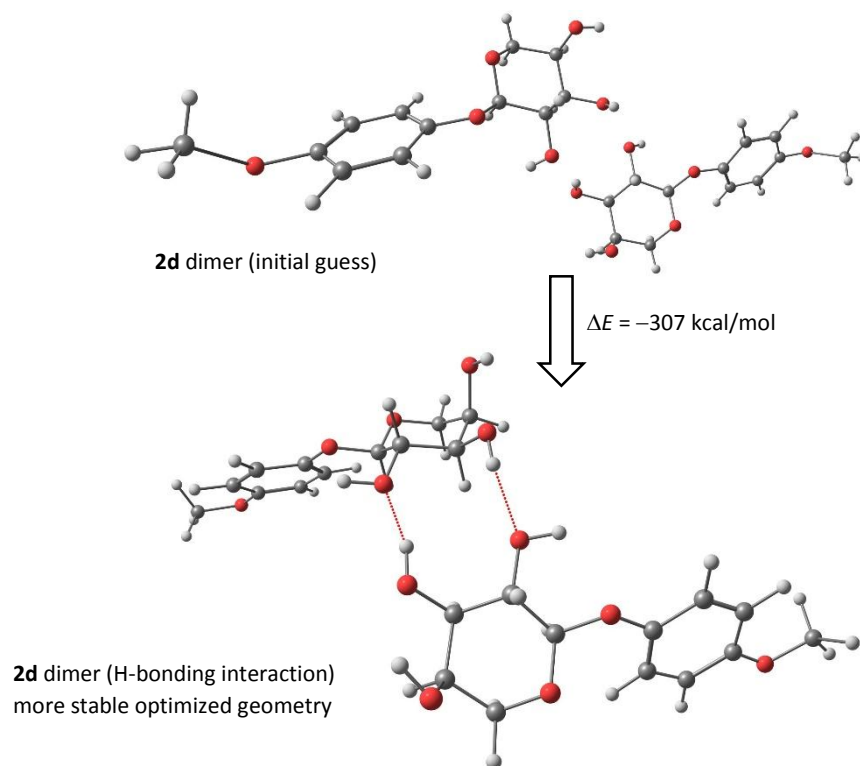

(b)

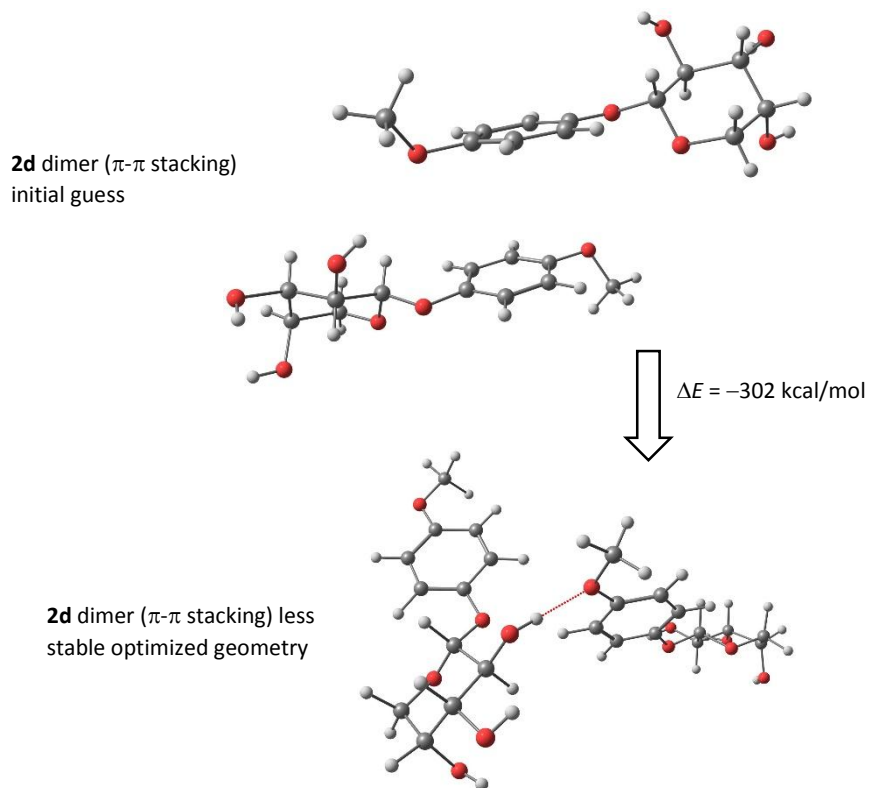

**Figure S13.** Optimized geometries of two differently oriented dimers of **2d** (a) H-bonding interactions (b)  $\pi$ - $\pi$  stacking interactions.

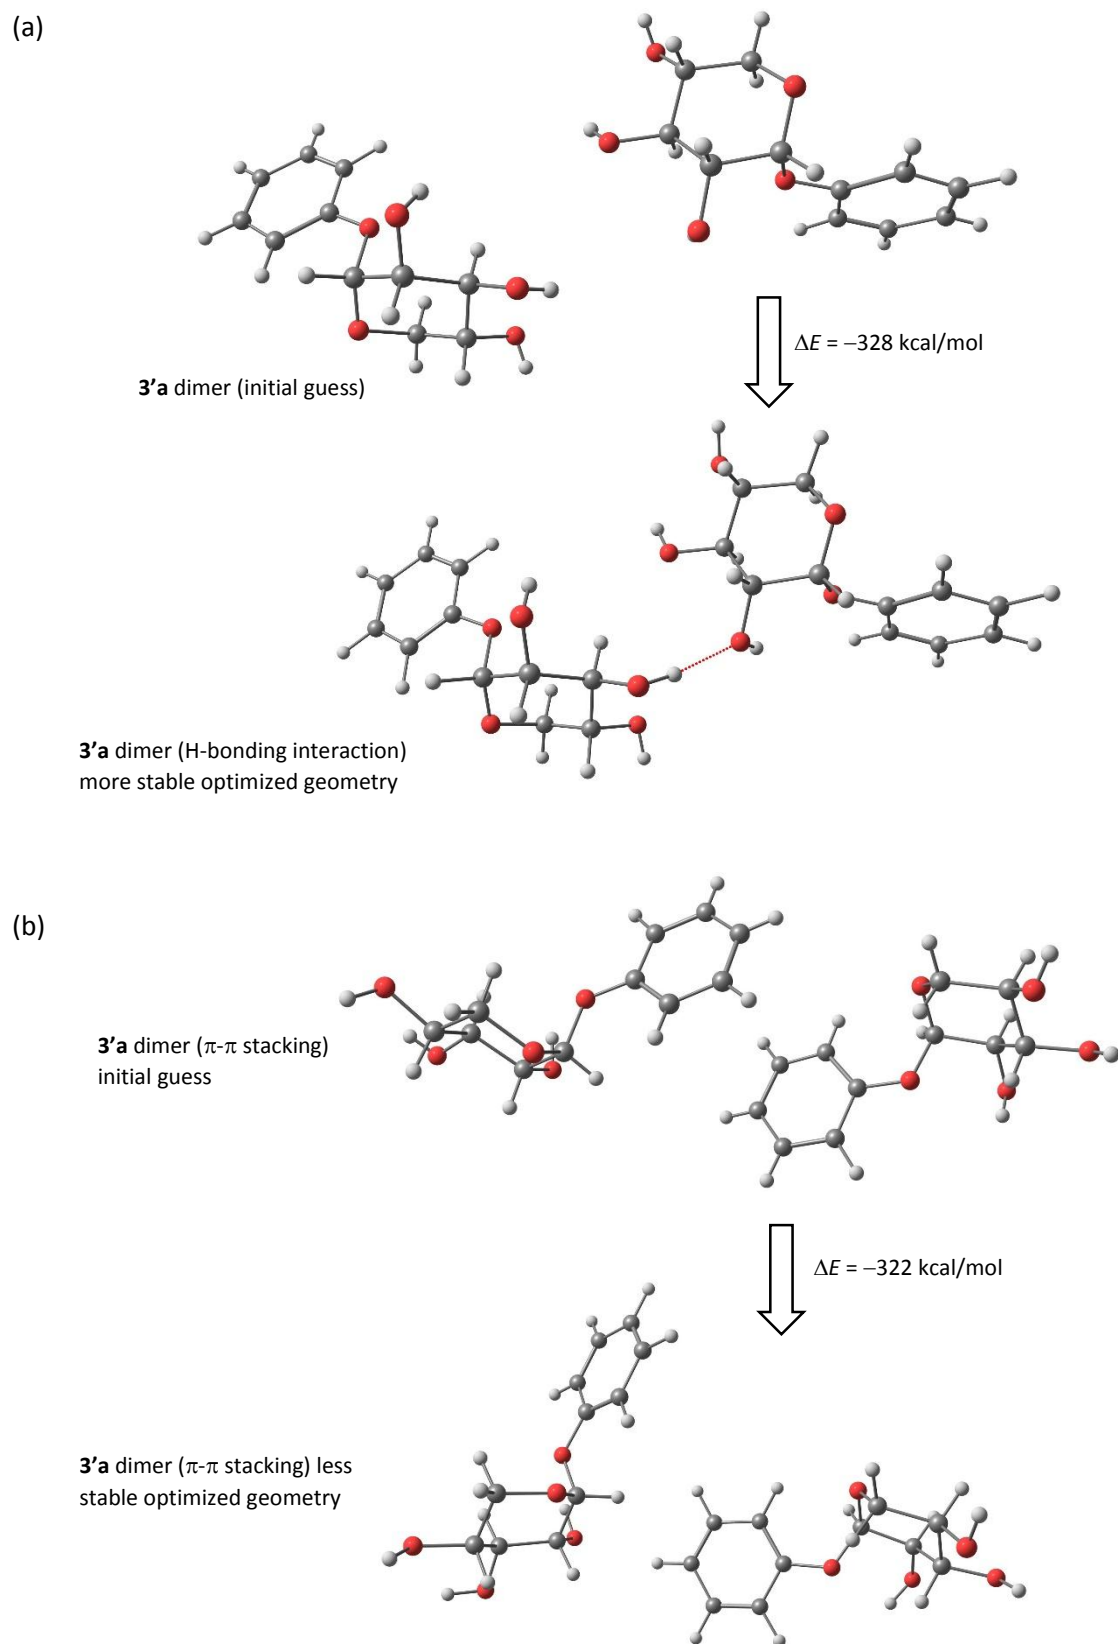

**Figure S14.** Optimized geometries of two differently oriented dimers of **3'a** (a) H-bonding interactions (b)  $\pi$ - $\pi$  stacking interactions.

(a)

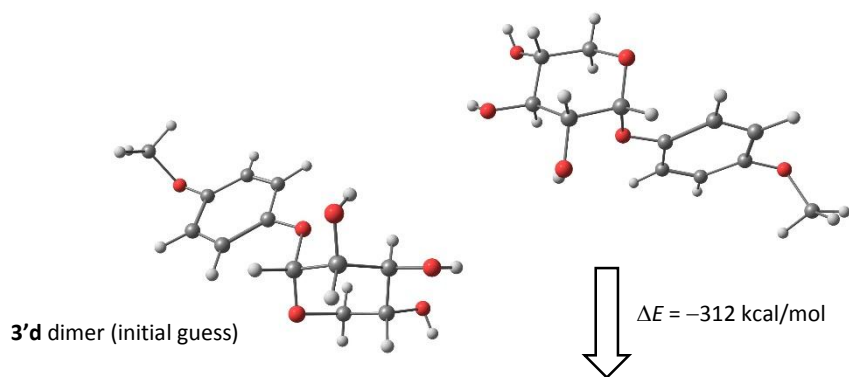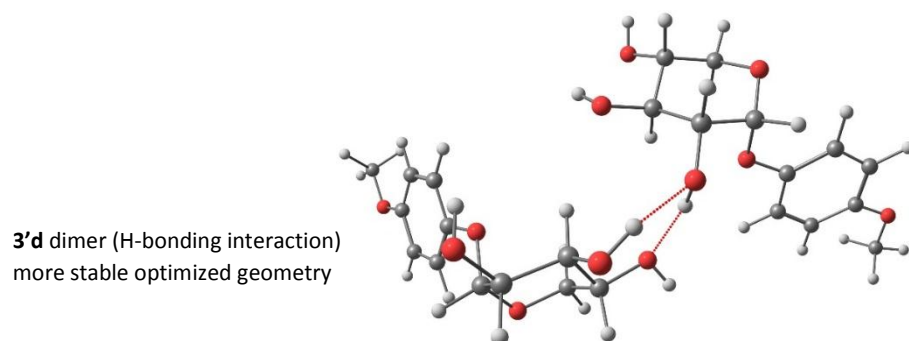

(b)

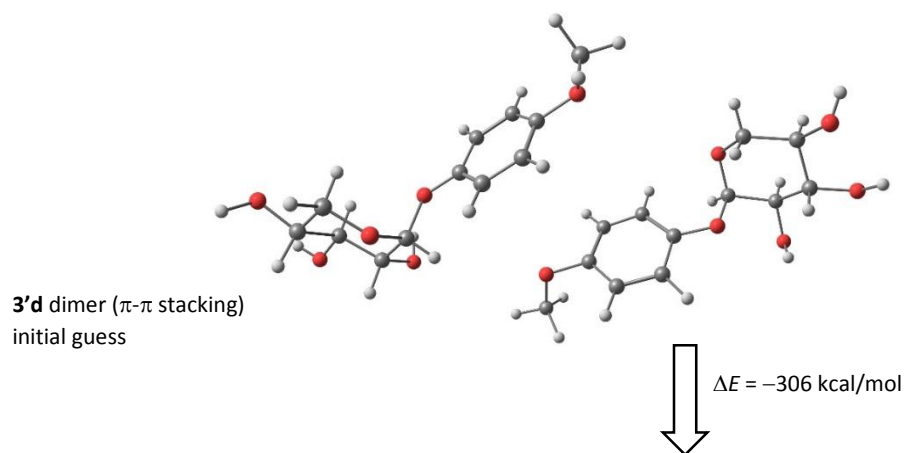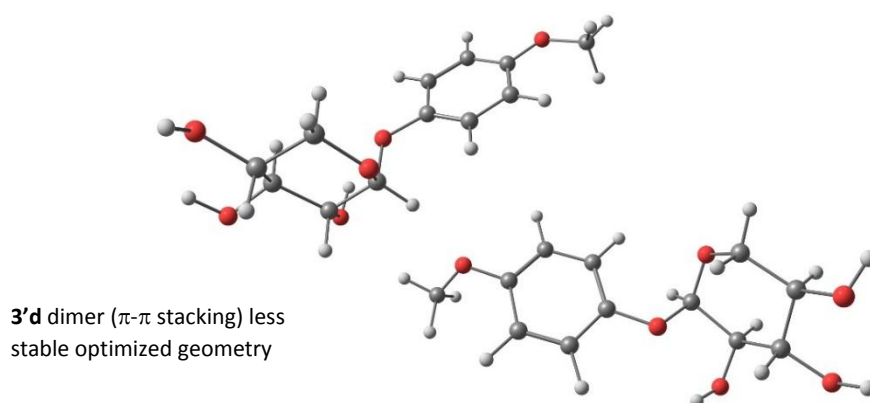

**Figure S15.** Optimized geometries of two differently oriented dimers of **3'd** (a) H-bonding interactions (b)  $\pi$ - $\pi$  stacking interactions.

**Table S3.** DFT-optimized Cartesian coordinates of monomer of **2b**.

|   |              |             |              |
|---|--------------|-------------|--------------|
| C | 7.767848000  | 3.206968000 | 7.313752000  |
| H | 7.669280000  | 3.505750000 | 8.360195000  |
| C | 8.970204000  | 3.408180000 | 6.637111000  |
| H | 9.822545000  | 3.862825000 | 7.146715000  |
| C | 9.085484000  | 3.012653000 | 5.299015000  |
| H | 10.016346000 | 3.138896000 | 4.742742000  |
| C | 8.000632000  | 2.432618000 | 4.646057000  |
| C | 8.078098000  | 2.940100000 | 2.311856000  |
| H | 7.629294000  | 3.886880000 | 2.681687000  |
| C | 9.486160000  | 4.075219000 | 0.790455000  |
| H | 10.551112000 | 4.142270000 | 0.530097000  |
| H | 9.135524000  | 5.079748000 | 1.102595000  |
| C | 8.683516000  | 3.629316000 | -0.431802000 |
| H | 8.656750000  | 4.477666000 | -1.145677000 |
| C | 7.243239000  | 3.302127000 | -0.019256000 |
| H | 6.738776000  | 4.243338000 | 0.276930000  |
| C | 7.223758000  | 2.362583000 | 1.181549000  |
| H | 7.676433000  | 1.395238000 | 0.897370000  |
| O | 8.091170000  | 1.982637000 | 3.344213000  |
| O | 9.405313000  | 3.163428000 | 1.885856000  |
| O | 9.318712000  | 2.508182000 | -1.025493000 |
| H | 8.667219000  | 2.113236000 | -1.629985000 |
| O | 6.584145000  | 2.734075000 | -1.147981000 |
| H | 5.747570000  | 2.355468000 | -0.831670000 |
| O | 5.869336000  | 2.201967000 | 1.582330000  |
| H | 5.865489000  | 1.766408000 | 2.456157000  |
| C | 6.778427000  | 2.231028000 | 5.326509000  |
| C | 6.672388000  | 2.619869000 | 6.666966000  |
| H | 5.741757000  | 2.474748000 | 7.215317000  |
| O | 5.767601000  | 1.663226000 | 4.593838000  |
| C | 4.519041000  | 1.426486000 | 5.234350000  |
| H | 4.060574000  | 2.367029000 | 5.584726000  |
| H | 3.869949000  | 0.967738000 | 4.477329000  |
| H | 4.630539000  | 0.734430000 | 6.086146000  |

**Table S4.** DFT-optimized Cartesian coordinates of dimer of **2b** (H-bonding).

|   |              |              |              |
|---|--------------|--------------|--------------|
| C | 8.502052000  | 5.285461000  | 6.806434000  |
| H | 8.348553000  | 6.093524000  | 7.525800000  |
| C | 9.794098000  | 4.899715000  | 6.450682000  |
| H | 10.660557000 | 5.399909000  | 6.888757000  |
| C | 9.978595000  | 3.855908000  | 5.535682000  |
| H | 10.975175000 | 3.515255000  | 5.248105000  |
| C | 8.875467000  | 3.216267000  | 4.976500000  |
| C | 9.353958000  | 2.402775000  | 2.774853000  |
| H | 9.132908000  | 3.464037000  | 2.528915000  |
| C | 11.147510000 | 2.338690000  | 1.253885000  |
| H | 12.216652000 | 2.088075000  | 1.229014000  |
| H | 11.027401000 | 3.403647000  | 0.968447000  |
| C | 10.388983000 | 1.467460000  | 0.256401000  |
| H | 10.647244000 | 1.819645000  | -0.763686000 |
| C | 8.868480000  | 1.618596000  | 0.434299000  |
| H | 8.573282000  | 2.633540000  | 0.101561000  |
| C | 8.486284000  | 1.481800000  | 1.909297000  |
| H | 8.670029000  | 0.445096000  | 2.240478000  |
| O | 9.012304000  | 2.143541000  | 4.117848000  |
| O | 10.726592000 | 2.141580000  | 2.602856000  |
| O | 10.786658000 | 0.116024000  | 0.422805000  |
| H | 10.103757000 | -0.421420000 | -0.015273000 |
| O | 8.266067000  | 0.629901000  | -0.383744000 |
| H | 7.289885000  | 0.750319000  | -0.407034000 |
| O | 7.111431000  | 1.833712000  | 2.074094000  |
| H | 6.957594000  | 2.008341000  | 3.027220000  |

|   |             |              |              |
|---|-------------|--------------|--------------|
| C | 4.101120000 | 1.522334000  | -6.857671000 |
| H | 4.209138000 | 1.891428000  | -7.880465000 |
| C | 2.835115000 | 1.245285000  | -6.342711000 |
| H | 1.944333000 | 1.393160000  | -6.957138000 |
| C | 2.709008000 | 0.762487000  | -5.034349000 |
| H | 1.735266000 | 0.517510000  | -4.605672000 |
| C | 3.843459000 | 0.572753000  | -4.249537000 |
| C | 5.127295000 | 0.859290000  | -4.766097000 |
| C | 3.359143000 | 0.888030000  | -1.924492000 |
| H | 3.466098000 | 1.950733000  | -2.232389000 |
| C | 1.529498000 | 1.388201000  | -0.532572000 |
| H | 0.490890000 | 1.070955000  | -0.367991000 |
| H | 1.531570000 | 2.463099000  | -0.805678000 |
| C | 2.336649000 | 1.199226000  | 0.748913000  |
| H | 2.009040000 | 1.975534000  | 1.470865000  |
| C | 3.839637000 | 1.401174000  | 0.491237000  |
| H | 4.021045000 | 2.473364000  | 0.277695000  |
| C | 4.282521000 | 0.599991000  | -0.734801000 |
| H | 4.210341000 | -0.478854000 | -0.513113000 |
| O | 3.770420000 | 0.043610000  | -2.976103000 |
| O | 2.014050000 | 0.604256000  | -1.621866000 |
| O | 2.082710000 | -0.094425000 | 1.272465000  |
| H | 2.799964000 | -0.273526000 | 1.905458000  |
| O | 4.508088000 | 1.007740000  | 1.677855000  |
| H | 5.469640000 | 1.205496000  | 1.616257000  |
| O | 5.621805000 | 0.961706000  | -1.076580000 |
| H | 5.788948000 | 0.662202000  | -1.996078000 |
| C | 7.564766000 | 3.609400000  | 5.329416000  |
| C | 7.385494000 | 4.645671000  | 6.252096000  |
| H | 6.384123000 | 4.963142000  | 6.542688000  |
| O | 6.549165000 | 2.925279000  | 4.711477000  |
| C | 5.199601000 | 3.257841000  | 5.027916000  |
| H | 4.979252000 | 4.311045000  | 4.784320000  |
| H | 4.574858000 | 2.601206000  | 4.408509000  |
| H | 4.986514000 | 3.075226000  | 6.094416000  |
| C | 5.249171000 | 1.330933000  | -6.077446000 |
| H | 6.229432000 | 1.554718000  | -6.498170000 |
| O | 6.175867000 | 0.652345000  | -3.906435000 |
| C | 7.503604000 | 0.903604000  | -4.360510000 |
| H | 7.631830000 | 1.957613000  | -4.660045000 |
| H | 8.159023000 | 0.684112000  | -3.507652000 |
| H | 7.763478000 | 0.246633000  | -5.207228000 |

**Table S5.** DFT-optimized Cartesian coordinates of dimer of **2b** ( $\pi$ - $\pi$  stacking).

|   |              |             |              |
|---|--------------|-------------|--------------|
| C | 13.481216000 | 4.423570000 | 0.939306000  |
| H | 13.919829000 | 4.477927000 | 1.938825000  |
| C | 14.278828000 | 4.623083000 | -0.187176000 |
| H | 15.345907000 | 4.830605000 | -0.080405000 |
| C | 13.705477000 | 4.545661000 | -1.462131000 |
| H | 14.301749000 | 4.680672000 | -2.366850000 |
| C | 12.345362000 | 4.280661000 | -1.600666000 |
| C | 11.493325000 | 5.320073000 | -3.577815000 |
| H | 11.564954000 | 6.208207000 | -2.914696000 |
| C | 12.227403000 | 6.529061000 | -5.475352000 |
| H | 12.999417000 | 6.468858000 | -6.254473000 |
| H | 12.367921000 | 7.473516000 | -4.911605000 |
| C | 10.841932000 | 6.544746000 | -6.121708000 |
| H | 10.707505000 | 7.533486000 | -6.606265000 |
| C | 9.767301000  | 6.387863000 | -5.040821000 |
| H | 9.765877000  | 7.300004000 | -4.412933000 |
| C | 10.073982000 | 5.197658000 | -4.138788000 |
| H | 10.043296000 | 4.266422000 | -4.733362000 |
| O | 11.752816000 | 4.149028000 | -2.841809000 |
| O | 12.443214000 | 5.408026000 | -4.619980000 |
| O | 10.760062000 | 5.510161000 | -7.089571000 |

|   |              |              |              |
|---|--------------|--------------|--------------|
| H | 9.814278000  | 5.393444000  | -7.283595000 |
| O | 8.502651000  | 6.248468000  | -5.688456000 |
| H | 7.882829000  | 5.900442000  | -5.026264000 |
| O | 9.096906000  | 5.179783000  | -3.105655000 |
| H | 9.394473000  | 4.556183000  | -2.412120000 |
| C | 8.357899000  | 10.724013000 | -2.670677000 |
| H | 8.074639000  | 11.361189000 | -3.512070000 |
| C | 8.138259000  | 9.347948000  | -2.728234000 |
| H | 7.685127000  | 8.896476000  | -3.613660000 |
| C | 8.508216000  | 8.540235000  | -1.644917000 |
| H | 8.372597000  | 7.457139000  | -1.671090000 |
| C | 9.082913000  | 9.115426000  | -0.514874000 |
| C | 8.570060000  | 8.027812000  | 1.545420000  |
| H | 7.783739000  | 8.811168000  | 1.586283000  |
| C | 7.050410000  | 6.355949000  | 2.239457000  |
| H | 6.657154000  | 5.386971000  | 1.902841000  |
| H | 6.206866000  | 7.071804000  | 2.303753000  |
| C | 7.685752000  | 6.211071000  | 3.620409000  |
| H | 6.875515000  | 6.036208000  | 4.356159000  |
| C | 8.408038000  | 7.509593000  | 3.996288000  |
| H | 7.647271000  | 8.298668000  | 4.157988000  |
| C | 9.330511000  | 7.974869000  | 2.872514000  |
| H | 10.148956000 | 7.243028000  | 2.743290000  |
| O | 9.509794000  | 8.336161000  | 0.547666000  |
| O | 7.982889000  | 6.774940000  | 1.244843000  |
| O | 8.580665000  | 5.105788000  | 3.608071000  |
| H | 9.127659000  | 5.191575000  | 4.407894000  |
| O | 9.124711000  | 7.271242000  | 5.204789000  |
| H | 9.710634000  | 8.032017000  | 5.350091000  |
| O | 9.837492000  | 9.251345000  | 3.237766000  |
| H | 10.204194000 | 9.667241000  | 2.435193000  |
| C | 12.113042000 | 4.151940000  | 0.810204000  |
| H | 11.504512000 | 4.009290000  | 1.702925000  |
| C | 11.532624000 | 4.079499000  | -0.462163000 |
| O | 10.208402000 | 3.830605000  | -0.702409000 |
| C | 9.354202000  | 3.578244000  | 0.416188000  |
| H | 9.303266000  | 4.445107000  | 1.092053000  |
| H | 8.359291000  | 3.386078000  | -0.005776000 |
| H | 9.690667000  | 2.687755000  | 0.972641000  |
| C | 8.946427000  | 11.308608000 | -1.541700000 |
| H | 9.113636000  | 12.385389000 | -1.521152000 |
| C | 9.315427000  | 10.507801000 | -0.454096000 |
| O | 9.899399000  | 10.971314000 | 0.696661000  |
| C | 10.140205000 | 12.368653000 | 0.818280000  |
| H | 9.201521000  | 12.945361000 | 0.758601000  |
| H | 10.592340000 | 12.515429000 | 1.807650000  |
| H | 10.837800000 | 12.725233000 | 0.041517000  |

**Table S6.** DFT-optimized Cartesian coordinates of monomer of **2d**.

|   |              |             |              |
|---|--------------|-------------|--------------|
| C | 8.827619000  | 3.948738000 | 6.300632000  |
| H | 9.659262000  | 4.554229000 | 6.666423000  |
| C | 8.794812000  | 3.517302000 | 4.975838000  |
| H | 9.619519000  | 3.762620000 | 4.307636000  |
| C | 7.719895000  | 2.737805000 | 4.526208000  |
| C | 8.313837000  | 2.865602000 | 2.195625000  |
| H | 8.307102000  | 3.970575000 | 2.321815000  |
| C | 10.437575000 | 2.933823000 | 1.150635000  |
| H | 11.430612000 | 2.474700000 | 1.247549000  |
| H | 10.541140000 | 4.029990000 | 1.281595000  |
| C | 9.871949000  | 2.652265000 | -0.240588000 |
| H | 10.434242000 | 3.271519000 | -0.968533000 |
| C | 8.396368000  | 3.065599000 | -0.296203000 |
| H | 8.335384000  | 4.170163000 | -0.228937000 |
| C | 7.624413000  | 2.480417000 | 0.882771000  |
| H | 7.640163000  | 1.378107000 | 0.818309000  |

|   |              |             |              |
|---|--------------|-------------|--------------|
| O | 7.591307000  | 2.261507000 | 3.229618000  |
| O | 9.644697000  | 2.383583000 | 2.202129000  |
| O | 10.032436000 | 1.274767000 | -0.538531000 |
| H | 9.467942000  | 1.092520000 | -1.309171000 |
| O | 7.867703000  | 2.625498000 | -1.542528000 |
| H | 6.902413000  | 2.723431000 | -1.496598000 |
| O | 6.294587000  | 2.982335000 | 0.799631000  |
| H | 5.786460000  | 2.587887000 | 1.525788000  |
| C | 6.741255000  | 2.807117000 | 6.746506000  |
| H | 5.932898000  | 2.513659000 | 7.415936000  |
| C | 6.703528000  | 2.383560000 | 5.414786000  |
| H | 5.875948000  | 1.768497000 | 5.055117000  |
| C | 7.806237000  | 3.600980000 | 7.196539000  |
| O | 7.940874000  | 4.074162000 | 8.475625000  |
| C | 6.948465000  | 3.735035000 | 9.429990000  |
| H | 6.879712000  | 2.642360000 | 9.576665000  |
| H | 7.257113000  | 4.205301000 | 10.372990000 |
| H | 5.954823000  | 4.122467000 | 9.142054000  |

**Table S7.** DFT-optimized Cartesian coordinates of dimer of **2d** (H-bonding).

|   |              |              |              |
|---|--------------|--------------|--------------|
| C | 8.913857000  | 5.675966000  | 6.935801000  |
| C | 9.607147000  | 5.792863000  | 5.722277000  |
| H | 10.199984000 | 6.692628000  | 5.544075000  |
| C | 9.558271000  | 4.777314000  | 4.768799000  |
| H | 10.139776000 | 4.872854000  | 3.852333000  |
| C | 8.794932000  | 3.628624000  | 5.018317000  |
| C | 9.043995000  | 2.718920000  | 2.794270000  |
| H | 8.678593000  | 3.698110000  | 2.410876000  |
| C | 10.876924000 | 2.807103000  | 1.326140000  |
| H | 11.971336000 | 2.714428000  | 1.342266000  |
| H | 10.612486000 | 3.819912000  | 0.959054000  |
| C | 10.283354000 | 1.763949000  | 0.384826000  |
| H | 10.497951000 | 2.082216000  | -0.655597000 |
| C | 8.752275000  | 1.674645000  | 0.537139000  |
| H | 8.303374000  | 2.604138000  | 0.132645000  |
| C | 8.377822000  | 1.576385000  | 2.016093000  |
| H | 8.758477000  | 0.628106000  | 2.423703000  |
| O | 8.667106000  | 2.564445000  | 4.134620000  |
| O | 10.445762000 | 2.646596000  | 2.677075000  |
| O | 10.886434000 | 0.507878000  | 0.649666000  |
| H | 10.336066000 | -0.156545000 | 0.198204000  |
| O | 8.344554000  | 0.550641000  | -0.218202000 |
| H | 7.369171000  | 0.525575000  | -0.342466000 |
| O | 6.954166000  | 1.654823000  | 2.157325000  |
| H | 6.794215000  | 1.788891000  | 3.107178000  |
| C | 4.057001000  | 2.056148000  | -7.100309000 |
| C | 3.528402000  | 2.841936000  | -6.065758000 |
| H | 3.145573000  | 3.835706000  | -6.308122000 |
| C | 3.474819000  | 2.362281000  | -4.758303000 |
| H | 3.021303000  | 2.973755000  | -3.978632000 |
| C | 3.968856000  | 1.083054000  | -4.468024000 |
| C | 3.812933000  | 1.332124000  | -2.075497000 |
| H | 4.414747000  | 2.260622000  | -2.195079000 |
| C | 2.231590000  | 2.486182000  | -0.767000000 |
| H | 1.148792000  | 2.666404000  | -0.724447000 |
| H | 2.746872000  | 3.459873000  | -0.897297000 |
| C | 2.699177000  | 1.843366000  | 0.535552000  |
| H | 2.678192000  | 2.621105000  | 1.325913000  |
| C | 4.146181000  | 1.334294000  | 0.414641000  |
| H | 4.829331000  | 2.203700000  | 0.377567000  |
| C | 4.322607000  | 0.529304000  | -0.871950000 |
| H | 3.718688000  | -0.391531000 | -0.807392000 |
| O | 3.969047000  | 0.515428000  | -3.201601000 |
| O | 2.450127000  | 1.657948000  | -1.908418000 |
| O | 1.816688000  | 0.782810000  | 0.868005000  |
| H | 2.258649000  | 0.267249000  | 1.565097000  |

|   |             |              |               |
|---|-------------|--------------|---------------|
| O | 4.407552000 | 0.553326000  | 1.566143000   |
| H | 5.369912000 | 0.569865000  | 1.755822000   |
| O | 5.705199000 | 0.208145000  | -1.028827000  |
| H | 5.786637000 | -0.284515000 | -1.863026000  |
| C | 8.165420000 | 4.516916000  | 7.187507000   |
| H | 7.619221000 | 4.388445000  | 8.121766000   |
| C | 4.533688000 | 0.770072000  | -6.807806000  |
| H | 4.945678000 | 0.128865000  | -7.586806000  |
| C | 4.488706000 | 0.293117000  | -5.494461000  |
| H | 4.860662000 | -0.706128000 | -5.258433000  |
| C | 8.109405000 | 3.502470000  | 6.227407000   |
| H | 7.527145000 | 2.597882000  | 6.415122000   |
| O | 4.057479000 | 2.623792000  | -8.347257000  |
| O | 9.034206000 | 6.730261000  | 7.801902000   |
| C | 4.574187000 | 1.870853000  | -9.432215000  |
| H | 4.474862000 | 2.507030000  | -10.321587000 |
| H | 5.639879000 | 1.620818000  | -9.283750000  |
| H | 4.004365000 | 0.937925000  | -9.590030000  |
| C | 8.361095000 | 6.660906000  | 9.048327000   |
| H | 8.595788000 | 7.594863000  | 9.575716000   |
| H | 7.266967000 | 6.585209000  | 8.916866000   |
| H | 8.710814000 | 5.805974000  | 9.653923000   |

**Table S8.** DFT-optimized Cartesian coordinates of dimer of **2d** ( $\pi$ - $\pi$  stacking).

|   |              |              |              |
|---|--------------|--------------|--------------|
| C | 15.193107000 | 7.401867000  | -0.990198000 |
| C | 15.226389000 | 6.487692000  | -2.053307000 |
| H | 16.184748000 | 6.044478000  | -2.331393000 |
| C | 14.060024000 | 6.136429000  | -2.730285000 |
| H | 14.096972000 | 5.392926000  | -3.525935000 |
| C | 12.838162000 | 6.714223000  | -2.356421000 |
| C | 11.615208000 | 5.975819000  | -4.289163000 |
| H | 12.387235000 | 6.517661000  | -4.877306000 |
| C | 11.868448000 | 4.025736000  | -5.622154000 |
| H | 12.065411000 | 2.952066000  | -5.499098000 |
| H | 12.682997000 | 4.465924000  | -6.232480000 |
| C | 10.541838000 | 4.228690000  | -6.349789000 |
| H | 10.688024000 | 3.943402000  | -7.411483000 |
| C | 10.148592000 | 5.707905000  | -6.296177000 |
| H | 10.864883000 | 6.285699000  | -6.914308000 |
| C | 10.221225000 | 6.250886000  | -4.869150000 |
| H | 9.495379000  | 5.705310000  | -4.240335000 |
| O | 11.626243000 | 6.422350000  | -2.963867000 |
| O | 11.879158000 | 4.581292000  | -4.308566000 |
| O | 9.548557000  | 3.408881000  | -5.754029000 |
| H | 8.692648000  | 3.742979000  | -6.072981000 |
| O | 8.835744000  | 5.836086000  | -6.830508000 |
| H | 8.527099000  | 6.725797000  | -6.588980000 |
| O | 9.908985000  | 7.632610000  | -4.942852000 |
| H | 9.678973000  | 7.963802000  | -4.051361000 |
| C | 8.286672000  | 8.550150000  | -1.532040000 |
| C | 7.273092000  | 9.247765000  | -0.870465000 |
| H | 6.949653000  | 10.232172000 | -1.207827000 |
| C | 6.634542000  | 8.676543000  | 0.240503000  |
| H | 5.816427000  | 9.213314000  | 0.719108000  |
| C | 7.020545000  | 7.414825000  | 0.694279000  |
| C | 5.723207000  | 7.499580000  | 2.721121000  |
| H | 6.241100000  | 8.458504000  | 2.943241000  |
| C | 3.602972000  | 8.468789000  | 3.137013000  |
| H | 2.627577000  | 8.583434000  | 2.645358000  |
| H | 4.025084000  | 9.476839000  | 3.324461000  |
| C | 3.426694000  | 7.748918000  | 4.472852000  |
| H | 2.945318000  | 8.455131000  | 5.179342000  |
| C | 4.797782000  | 7.361086000  | 5.040360000  |
| H | 5.335224000  | 8.285964000  | 5.330481000  |
| C | 5.636531000  | 6.641559000  | 3.987712000  |



|   |              |              |              |
|---|--------------|--------------|--------------|
| H | 5.138081000  | 5.696916000  | 3.707666000  |
| O | 6.457320000  | 6.767868000  | 1.780870000  |
| O | 4.425987000  | 7.752458000  | 2.216417000  |
| O | 2.607066000  | 6.607575000  | 4.281522000  |
| H | 2.703985000  | 6.061871000  | 5.080632000  |
| O | 4.579204000  | 6.546494000  | 6.186380000  |
| H | 5.434613000  | 6.155898000  | 6.429947000  |
| O | 6.913099000  | 6.399117000  | 4.569089000  |
| H | 7.436828000  | 5.889632000  | 3.930964000  |
| C | 13.966966000 | 7.965898000  | -0.609688000 |
| H | 13.903676000 | 8.677571000  | 0.213394000  |
| C | 8.665834000  | 7.275813000  | -1.079337000 |
| H | 9.464766000  | 6.740606000  | -1.596956000 |
| C | 12.798784000 | 7.623122000  | -1.297723000 |
| H | 11.842028000 | 8.066145000  | -1.015112000 |
| C | 8.035688000  | 6.715176000  | 0.025054000  |
| H | 8.325296000  | 5.725984000  | 0.385038000  |
| O | 16.396382000 | 7.672180000  | -0.390664000 |
| C | 16.418346000 | 8.575988000  | 0.701062000  |
| H | 17.465115000 | 8.637825000  | 1.027075000  |
| H | 16.072329000 | 9.582749000  | 0.405622000  |
| H | 15.798649000 | 8.216042000  | 1.541798000  |
| O | 8.962590000  | 9.027485000  | -2.637404000 |
| C | 8.662592000  | 10.337686000 | -3.106644000 |
| H | 7.613095000  | 10.416868000 | -3.438092000 |
| H | 9.327112000  | 10.515307000 | -3.962058000 |
| H | 8.858250000  | 11.093496000 | -2.327233000 |

**Table S9.** DFT-optimized Cartesian coordinates of monomer of **3'a**.

|   |             |              |              |
|---|-------------|--------------|--------------|
| C | 5.377593000 | 6.278199000  | 11.417389000 |
| H | 6.264732000 | 5.860569000  | 10.916589000 |
| C | 5.591819000 | 6.297072000  | 12.944599000 |
| H | 6.554954000 | 6.796541000  | 13.135459000 |
| C | 4.493107000 | 7.111762000  | 13.641453000 |
| H | 3.528694000 | 6.574372000  | 13.536496000 |
| C | 4.339069000 | 8.474523000  | 12.962713000 |
| H | 5.268820000 | 9.046985000  | 13.138193000 |
| C | 4.125738000 | 8.305506000  | 11.458354000 |
| H | 3.161080000 | 7.803684000  | 11.270923000 |
| H | 4.117659000 | 9.278052000  | 10.944442000 |
| C | 4.051528000 | 4.889732000  | 9.930268000  |
| C | 4.699408000 | 5.329583000  | 8.768989000  |
| H | 5.391846000 | 6.170236000  | 8.800125000  |
| C | 4.420129000 | 4.695675000  | 7.552134000  |
| H | 4.927183000 | 5.040128000  | 6.647034000  |
| C | 3.501059000 | 3.647417000  | 7.481664000  |
| H | 3.288674000 | 3.163014000  | 6.525921000  |
| C | 2.850020000 | 3.227176000  | 8.647598000  |
| H | 2.126602000 | 2.408759000  | 8.607700000  |
| O | 5.209061000 | 7.568459000  | 10.879242000 |
| O | 5.730531000 | 4.984906000  | 13.449466000 |
| O | 4.832711000 | 7.256964000  | 15.010095000 |
| H | 4.145205000 | 7.815325000  | 15.407316000 |
| O | 3.227594000 | 9.123828000  | 13.588355000 |
| H | 3.283624000 | 10.076295000 | 13.422642000 |
| O | 4.254757000 | 5.436379000  | 11.183959000 |
| H | 4.940089000 | 4.489894000  | 13.177760000 |
| C | 3.121764000 | 3.842445000  | 9.868793000  |
| H | 2.626615000 | 3.521312000  | 10.787616000 |

**Table S10.** DFT-optimized Cartesian coordinates of dimer of **3'a** (H-bonding).

|   |              |             |              |
|---|--------------|-------------|--------------|
| C | 5.237010000  | 6.381715000 | 11.993530000 |
| H | 6.132754000  | 6.059369000 | 11.441243000 |
| C | 5.524034000  | 6.387848000 | 13.507063000 |
| H | 6.445619000  | 6.972348000 | 13.657349000 |
| C | 4.400872000  | 7.074309000 | 14.299440000 |
| H | 3.492913000  | 6.441818000 | 14.258868000 |
| C | 4.056252000  | 8.423968000 | 13.654652000 |
| H | 4.919728000  | 9.095510000 | 13.813638000 |
| C | 3.801584000  | 8.269489000 | 12.154582000 |
| H | 2.884637000  | 7.677202000 | 11.994273000 |
| H | 3.669690000  | 9.248276000 | 11.670871000 |
| C | 3.981165000  | 4.914824000 | 10.525231000 |
| C | 4.541384000  | 5.437330000 | 9.352103000  |
| H | 5.160075000  | 6.333447000 | 9.381557000  |
| C | 4.269374000  | 4.813037000 | 8.129192000  |
| H | 4.709152000  | 5.223309000 | 7.216568000  |
| C | 3.441486000  | 3.691648000 | 8.061983000  |
| H | 3.233426000  | 3.215215000 | 7.101523000  |
| C | 2.875867000  | 3.187479000 | 9.238904000  |
| H | 2.223781000  | 2.311009000 | 9.201947000  |
| O | 4.921520000  | 7.660321000 | 11.500454000 |
| O | 5.820767000  | 5.081667000 | 13.962854000 |
| O | 4.831007000  | 7.237135000 | 15.632702000 |
| H | 4.038440000  | 7.347366000 | 16.190759000 |
| O | 2.893915000  | 8.943264000 | 14.308270000 |
| H | 2.905744000  | 9.907337000 | 14.234404000 |
| O | 4.186575000  | 5.442165000 | 11.782336000 |
| H | 5.032156000  | 4.540570000 | 13.800009000 |
| C | 2.380102000  | 5.996862000 | 19.628368000 |
| H | 3.207456000  | 6.503862000 | 20.148277000 |
| C | 2.687372000  | 5.889408000 | 18.122600000 |
| H | 3.691856000  | 5.453856000 | 18.011455000 |
| C | 1.685314000  | 4.966266000 | 17.419924000 |
| H | 0.683456000  | 5.440285000 | 17.435509000 |
| C | 1.582463000  | 3.640902000 | 18.176915000 |
| H | 2.557397000  | 3.126396000 | 18.095191000 |
| C | 1.265452000  | 3.890551000 | 19.651754000 |
| H | 0.261198000  | 4.336521000 | 19.749114000 |
| H | 1.288346000  | 2.954497000 | 20.228274000 |
| C | 0.877015000  | 7.382143000 | 20.936380000 |
| C | 1.486964000  | 7.071316000 | 22.157537000 |
| H | 2.241191000  | 6.288001000 | 22.222909000 |
| C | 1.090685000  | 7.760012000 | 23.310438000 |
| H | 1.568599000  | 7.516668000 | 24.262774000 |
| C | 0.093952000  | 8.735198000 | 23.258109000 |
| H | -0.209457000 | 9.263304000 | 24.164757000 |
| C | -0.517683000 | 9.025595000 | 22.032870000 |
| H | -1.301333000 | 9.785338000 | 21.977490000 |
| O | 2.262047000  | 4.734709000 | 20.239740000 |
| O | 2.771641000  | 7.179840000 | 17.539607000 |
| O | 2.109822000  | 4.759570000 | 16.080727000 |
| H | 1.485342000  | 4.124606000 | 15.693909000 |
| O | 0.558447000  | 2.878377000 | 17.531482000 |
| H | 0.674052000  | 1.942735000 | 17.751499000 |
| O | 1.194914000  | 6.772870000 | 19.735474000 |
| H | 1.924969000  | 7.641324000 | 17.678851000 |
| C | -0.130042000 | 8.354936000 | 20.874054000 |
| H | -0.593520000 | 8.575084000 | 19.910324000 |
| C | 3.142542000  | 3.792231000 | 10.465773000 |
| H | 2.714077000  | 3.406376000 | 11.392741000 |

**Table S11.** DFT-optimized Cartesian coordinates of dimer of **3'a** ( $\pi$ - $\pi$  stacking).

|   |              |              |              |
|---|--------------|--------------|--------------|
| C | -0.599317000 | 15.252722000 | 15.362904000 |
| H | -0.234424000 | 14.247413000 | 15.622803000 |
| C | 0.409317000  | 15.952303000 | 14.429264000 |
| H | 0.626510000  | 15.257487000 | 13.602946000 |
| C | -0.188697000 | 17.231483000 | 13.829577000 |
| H | -0.321512000 | 17.977236000 | 14.639723000 |
| C | -1.570106000 | 16.940091000 | 13.239741000 |
| H | -1.434205000 | 16.261981000 | 12.376870000 |
| C | -2.465137000 | 16.262778000 | 14.278061000 |
| H | -2.668443000 | 16.959537000 | 15.109205000 |
| H | -3.425589000 | 15.956716000 | 13.837854000 |
| C | -1.161524000 | 15.511662000 | 17.710756000 |
| C | -1.840161000 | 14.288586000 | 17.787987000 |
| H | -2.051864000 | 13.708846000 | 16.890048000 |
| C | -2.275783000 | 13.829549000 | 19.037058000 |
| H | -2.804712000 | 12.874690000 | 19.094871000 |
| C | -2.054807000 | 14.576892000 | 20.195077000 |
| H | -2.401839000 | 14.209207000 | 21.163254000 |
| C | -1.388473000 | 15.804710000 | 20.101585000 |
| H | -1.211289000 | 16.402656000 | 20.999221000 |
| O | -1.853829000 | 15.058556000 | 14.754703000 |
| O | 1.642600000  | 16.164310000 | 15.090014000 |
| O | 0.697547000  | 17.727771000 | 12.840670000 |
| H | 0.266975000  | 18.504318000 | 12.448138000 |
| O | -2.107348000 | 18.194692000 | 12.809576000 |
| H | -2.812553000 | 18.032656000 | 12.165900000 |
| O | -0.678923000 | 16.056099000 | 16.535089000 |
| H | 1.451226000  | 16.676365000 | 15.893191000 |
| C | 2.211827000  | 7.930067000  | 16.637134000 |
| H | 2.790962000  | 8.400853000  | 17.446496000 |
| C | 2.687732000  | 6.479096000  | 16.420291000 |
| H | 2.674847000  | 5.978363000  | 17.401349000 |
| C | 1.728358000  | 5.720581000  | 15.492336000 |
| H | 1.802155000  | 6.151794000  | 14.473358000 |
| C | 0.284656000  | 5.898488000  | 15.967258000 |
| H | 0.185240000  | 5.391186000  | 16.944864000 |
| C | -0.049837000 | 7.381135000  | 16.132185000 |
| H | -0.028396000 | 7.881509000  | 15.148977000 |
| H | -1.049556000 | 7.518304000  | 16.570447000 |
| C | 2.516234000  | 9.997035000  | 15.400505000 |
| C | 2.077356000  | 10.812236000 | 16.450770000 |
| H | 1.622748000  | 10.380152000 | 17.341620000 |
| C | 2.199353000  | 12.202367000 | 16.329469000 |
| H | 1.857881000  | 12.835698000 | 17.152643000 |
| C | 2.736238000  | 12.783418000 | 15.178244000 |
| H | 2.817832000  | 13.869940000 | 15.097224000 |
| C | 3.157864000  | 11.953989000 | 14.130972000 |
| H | 3.580014000  | 12.392383000 | 13.222993000 |
| O | 0.864271000  | 8.000517000  | 17.043616000 |
| O | 4.032748000  | 6.450515000  | 15.988740000 |
| O | 2.096294000  | 4.351278000  | 15.477610000 |
| H | 1.445493000  | 3.896761000  | 14.919004000 |
| O | -0.551507000 | 5.268114000  | 14.991261000 |
| H | -1.416293000 | 5.085780000  | 15.387194000 |
| O | 2.450408000  | 8.614296000  | 15.414507000 |
| H | 4.087621000  | 7.003870000  | 15.192098000 |
| C | 3.051071000  | 10.567705000 | 14.237326000 |
| H | 3.381586000  | 9.909921000  | 13.430575000 |
| C | -0.941389000 | 16.273182000 | 18.867006000 |
| H | -0.414585000 | 17.225763000 | 18.779380000 |

**Table S12.** DFT-optimized Cartesian coordinates of monomer of **3'd**.

|   |             |              |              |
|---|-------------|--------------|--------------|
| C | 5.208005000 | 6.731133000  | 11.284767000 |
| H | 6.161896000 | 6.376469000  | 10.863725000 |
| C | 5.324365000 | 6.875606000  | 12.816089000 |
| H | 6.219915000 | 7.482783000  | 13.022883000 |
| C | 4.109080000 | 7.618157000  | 13.389552000 |
| H | 3.211765000 | 6.977148000  | 13.272130000 |
| C | 3.861544000 | 8.908199000  | 12.605328000 |
| H | 4.716068000 | 9.585787000  | 12.788604000 |
| C | 3.760390000 | 8.616182000  | 11.108187000 |
| H | 2.866090000 | 8.002008000  | 10.906395000 |
| H | 3.684345000 | 9.545227000  | 10.524087000 |
| C | 4.146289000 | 5.104339000  | 9.832535000  |
| C | 4.763628000 | 5.569369000  | 8.661891000  |
| H | 5.306584000 | 6.514283000  | 8.657028000  |
| C | 4.655078000 | 4.830102000  | 7.485068000  |
| H | 5.129606000 | 5.179125000  | 6.565764000  |
| C | 3.926195000 | 3.632478000  | 7.450987000  |
| C | 3.299336000 | 3.178734000  | 8.620765000  |
| H | 2.723511000 | 2.253495000  | 8.630832000  |
| O | 4.947700000 | 7.961352000  | 10.646977000 |
| O | 5.557995000 | 5.621078000  | 13.422754000 |
| O | 4.346726000 | 7.890375000  | 14.760698000 |
| H | 3.584052000 | 8.401296000  | 15.076318000 |
| O | 2.653814000 | 9.478851000  | 13.120264000 |
| H | 2.624652000 | 10.418517000 | 12.887859000 |
| O | 4.192084000 | 5.766782000  | 11.050369000 |
| H | 4.844320000 | 5.029311000  | 13.132527000 |
| C | 3.415057000 | 3.915369000  | 9.803149000  |
| H | 2.935116000 | 3.564845000  | 10.719352000 |
| O | 3.881553000 | 2.988700000  | 6.242266000  |
| C | 3.159491000 | 1.771528000  | 6.150993000  |
| H | 2.089586000 | 1.912627000  | 6.386823000  |
| H | 3.256497000 | 1.435272000  | 5.110263000  |
| H | 3.576505000 | 0.998514000  | 6.820867000  |

**Table S13.** DFT-optimized Cartesian coordinates of dimer of **3'd** (H-bonding).

|   |             |             |              |
|---|-------------|-------------|--------------|
| C | 4.823503000 | 6.991984000 | 12.323016000 |
| H | 5.392384000 | 7.163809000 | 11.395970000 |
| C | 5.781687000 | 6.893517000 | 13.524417000 |
| H | 6.426545000 | 7.786525000 | 13.498584000 |
| C | 5.022863000 | 6.902688000 | 14.864969000 |
| H | 4.458644000 | 5.955160000 | 14.961606000 |
| C | 4.013373000 | 8.061290000 | 14.876206000 |
| H | 4.588636000 | 9.002329000 | 14.929028000 |
| C | 3.140408000 | 8.054495000 | 13.620089000 |
| H | 2.487968000 | 7.164537000 | 13.629830000 |
| H | 2.502792000 | 8.950141000 | 13.575732000 |
| C | 3.551526000 | 5.372070000 | 11.045902000 |
| C | 3.239142000 | 6.261458000 | 10.006530000 |
| H | 3.433044000 | 7.328737000 | 10.111011000 |
| C | 2.646787000 | 5.779574000 | 8.840237000  |
| H | 2.398541000 | 6.460067000 | 8.023219000  |
| C | 2.344771000 | 4.418066000 | 8.694284000  |
| C | 2.644829000 | 3.534459000 | 9.741185000  |
| H | 2.422869000 | 2.470233000 | 9.663525000  |
| O | 3.941636000 | 8.087269000 | 12.436351000 |
| O | 6.651747000 | 5.789412000 | 13.380135000 |
| O | 5.964983000 | 7.028335000 | 15.909282000 |
| H | 5.584323000 | 6.610425000 | 16.707142000 |
| O | 3.177684000 | 7.938863000 | 16.045991000 |
| H | 2.837137000 | 8.815021000 | 16.278292000 |
| O | 4.139845000 | 5.748955000 | 12.241487000 |
| H | 6.100275000 | 4.990522000 | 13.362166000 |

|   |              |              |              |
|---|--------------|--------------|--------------|
| C | 2.651565000  | 5.469130000  | 19.681930000 |
| H | 3.240031000  | 5.897257000  | 20.508113000 |
| C | 3.581733000  | 5.107403000  | 18.506300000 |
| H | 4.369533000  | 4.452832000  | 18.911994000 |
| C | 2.808454000  | 4.322007000  | 17.441003000 |
| H | 2.032308000  | 4.980010000  | 17.003419000 |
| C | 2.102980000  | 3.132191000  | 18.093535000 |
| H | 2.880917000  | 2.439315000  | 18.464732000 |
| C | 1.236758000  | 3.597466000  | 19.266255000 |
| H | 0.402497000  | 4.213851000  | 18.890133000 |
| H | 0.817385000  | 2.740579000  | 19.814120000 |
| C | 1.036014000  | 7.223037000  | 20.094774000 |
| C | 0.963125000  | 6.985943000  | 21.475568000 |
| H | 1.438347000  | 6.110653000  | 21.917723000 |
| C | 0.247314000  | 7.862443000  | 22.289716000 |
| H | 0.182542000  | 7.690349000  | 23.365971000 |
| C | -0.415286000 | 8.972660000  | 21.746955000 |
| C | -0.354530000 | 9.196614000  | 20.363658000 |
| H | -0.861887000 | 10.045925000 | 19.906403000 |
| O | 2.023026000  | 4.322077000  | 20.218279000 |
| O | 4.244631000  | 6.250237000  | 18.009068000 |
| O | 3.713038000  | 3.892970000  | 16.431930000 |
| H | 3.199545000  | 3.331563000  | 15.828364000 |
| O | 1.324419000  | 2.503393000  | 17.070113000 |
| H | 1.104664000  | 1.602468000  | 17.349388000 |
| O | 1.722691000  | 6.420989000  | 19.198979000 |
| H | 3.619407000  | 6.818275000  | 17.509089000 |
| C | 0.370343000  | 8.322689000  | 19.548520000 |
| H | 0.424056000  | 8.489133000  | 18.470558000 |
| C | 3.247589000  | 4.016044000  | 10.906902000 |
| H | 3.493246000  | 3.332705000  | 11.722552000 |
| O | -1.091903000 | 9.765543000  | 22.636804000 |
| O | 1.759956000  | 4.054010000  | 7.508830000  |
| C | 1.429285000  | 2.689836000  | 7.310332000  |
| H | 0.698702000  | 2.333628000  | 8.058585000  |
| H | 0.979559000  | 2.625688000  | 6.310632000  |
| H | 2.324083000  | 2.042958000  | 7.345940000  |
| C | -1.786386000 | 10.897543000 | 22.140073000 |
| H | -2.576775000 | 10.609575000 | 21.424014000 |
| H | -2.249149000 | 11.379840000 | 23.011189000 |
| H | -1.102278000 | 11.614165000 | 21.651450000 |

**Table S14.** DFT-optimized Cartesian coordinates of dimer of **3'd** ( $\pi$ - $\pi$  stacking).

|   |              |              |              |
|---|--------------|--------------|--------------|
| C | 1.643375000  | 15.128614000 | 15.681000000 |
| H | 2.078153000  | 14.157519000 | 15.955425000 |
| C | 2.749171000  | 16.083885000 | 15.186548000 |
| H | 3.316078000  | 15.556289000 | 14.402777000 |
| C | 2.150115000  | 17.351405000 | 14.562926000 |
| H | 1.662805000  | 17.947210000 | 15.361132000 |
| C | 1.072329000  | 16.974120000 | 13.544502000 |
| H | 1.571111000  | 16.462030000 | 12.700067000 |
| C | 0.041292000  | 16.030326000 | 14.167771000 |
| H | -0.520346000 | 16.557473000 | 14.958202000 |
| H | -0.676397000 | 15.668968000 | 13.415706000 |
| C | 0.305818000  | 15.019199000 | 17.707085000 |
| C | -0.079521000 | 13.699503000 | 17.486299000 |
| H | 0.182124000  | 13.168118000 | 16.569900000 |
| C | -0.840326000 | 13.043994000 | 18.443026000 |
| H | -1.121076000 | 12.026425000 | 18.253281000 |
| C | -1.237643000 | 13.698117000 | 19.615329000 |
| C | -0.868478000 | 15.030442000 | 19.833661000 |
| H | -1.184845000 | 15.534216000 | 20.749062000 |
| O | 0.683607000  | 14.860310000 | 14.684658000 |
| O | 3.678015000  | 16.353748000 | 16.215401000 |
| O | 3.194499000  | 18.096384000 | 13.955887000 |

|   |              |              |              |
|---|--------------|--------------|--------------|
| H | 2.777885000  | 18.868112000 | 13.539700000 |
| O | 0.478982000  | 18.200341000 | 13.102694000 |
| H | 0.017406000  | 18.041524000 | 12.266148000 |
| O | 1.069263000  | 15.759676000 | 16.822365000 |
| H | 3.168645000  | 16.672216000 | 16.979469000 |
| C | 2.636934000  | 6.359540000  | 17.726346000 |
| H | 3.229380000  | 6.756375000  | 18.565907000 |
| C | 3.019423000  | 4.889903000  | 17.450751000 |
| H | 2.956051000  | 4.348821000  | 18.408528000 |
| C | 2.027955000  | 4.238079000  | 16.477395000 |
| H | 2.148301000  | 4.708586000  | 15.479750000 |
| C | 0.592061000  | 4.491552000  | 16.940786000 |
| H | 0.445523000  | 3.952153000  | 17.895616000 |
| C | 0.352161000  | 5.985218000  | 17.162353000 |
| H | 0.419186000  | 6.522893000  | 16.200395000 |
| H | -0.642412000 | 6.171030000  | 17.594886000 |
| C | 3.126662000  | 8.448390000  | 16.590086000 |
| C | 2.675361000  | 9.250929000  | 17.644653000 |
| H | 2.117106000  | 8.817019000  | 18.473768000 |
| C | 2.908160000  | 10.640851000 | 17.639656000 |
| H | 2.546768000  | 11.300133000 | 18.506827000 |
| C | 3.579539000  | 11.189720000 | 16.548611000 |
| C | 4.028868000  | 10.374740000 | 15.443127000 |
| H | 4.533088000  | 10.809335000 | 14.577599000 |
| O | 1.290719000  | 6.506374000  | 18.110155000 |
| O | 4.366552000  | 4.790686000  | 17.037783000 |
| O | 2.304952000  | 2.849566000  | 16.407207000 |
| H | 1.632940000  | 2.463850000  | 15.822196000 |
| O | -0.267427000 | 3.957525000  | 15.928374000 |
| H | -1.145221000 | 3.807258000  | 16.309159000 |
| O | 2.947803000  | 7.075964000  | 16.536508000 |
| H | 4.469235000  | 5.374865000  | 16.268304000 |
| C | 3.796122000  | 9.009151000  | 15.483391000 |
| H | 4.120183000  | 8.357418000  | 14.669451000 |
| C | -0.097830000 | 15.698744000 | 18.886382000 |
| H | 0.195725000  | 16.737327000 | 19.051267000 |
| O | 3.731500000  | 12.561754000 | 16.542200000 |
| O | -1.997729000 | 13.132362000 | 20.608680000 |
| C | 5.077753000  | 13.070575000 | 16.464605000 |
| H | 5.590441000  | 12.720097000 | 15.552838000 |
| H | 4.999323000  | 14.164099000 | 16.442009000 |
| H | 5.663702000  | 12.764035000 | 17.348418000 |
| C | -2.419852000 | 11.788752000 | 20.453528000 |
| H | -1.561459000 | 11.097881000 | 20.372711000 |
| H | -3.001068000 | 11.538763000 | 21.350986000 |
| H | -3.060645000 | 11.664024000 | 19.561850000 |

## UV-spectra

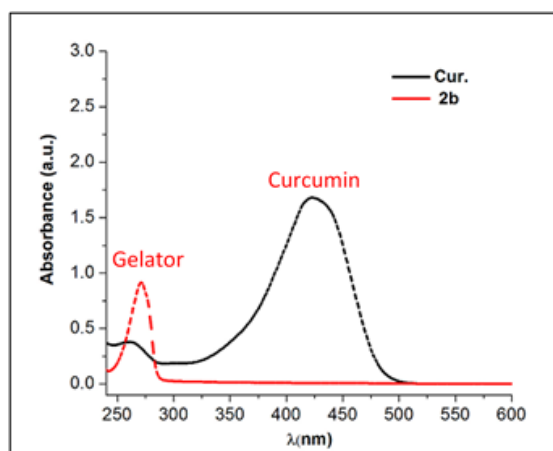

Figure S16. UV-spectra for release of gelator **2b** (red) and curcumin (black).

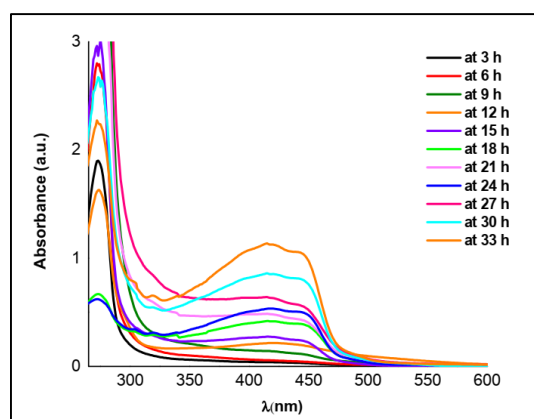

Figure S17. UV-spectra for release of curcumin from MO gel of **2b+Cur** at pH 7 in buffer solution.

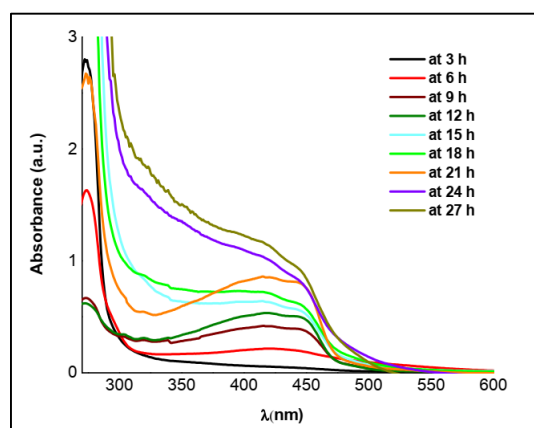

Figure S18. UV-spectra for release of curcumin from MO gelator of **2b+Cur** at pH 7.4 in buffer solution.

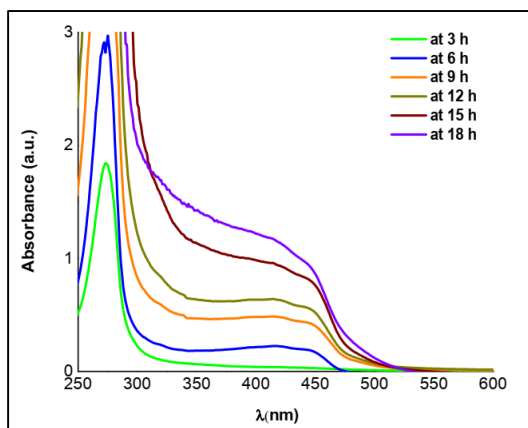

Figure S19. UV-spectra for release of curcumin from MO gelator of **2b+Cur** at pH 7.6 in buffer solution.

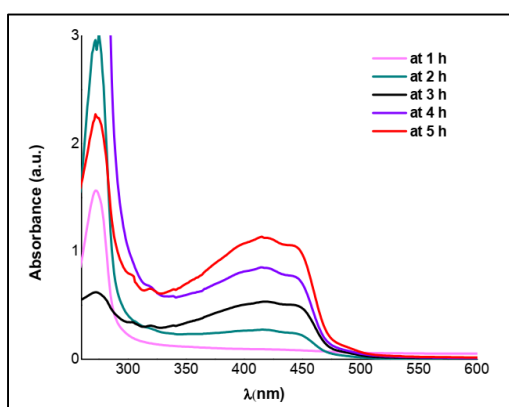

Figure S20. UV-spectra for release of curcumin from MO gelator of **2b+Cur** at pH 8 in buffer solution.

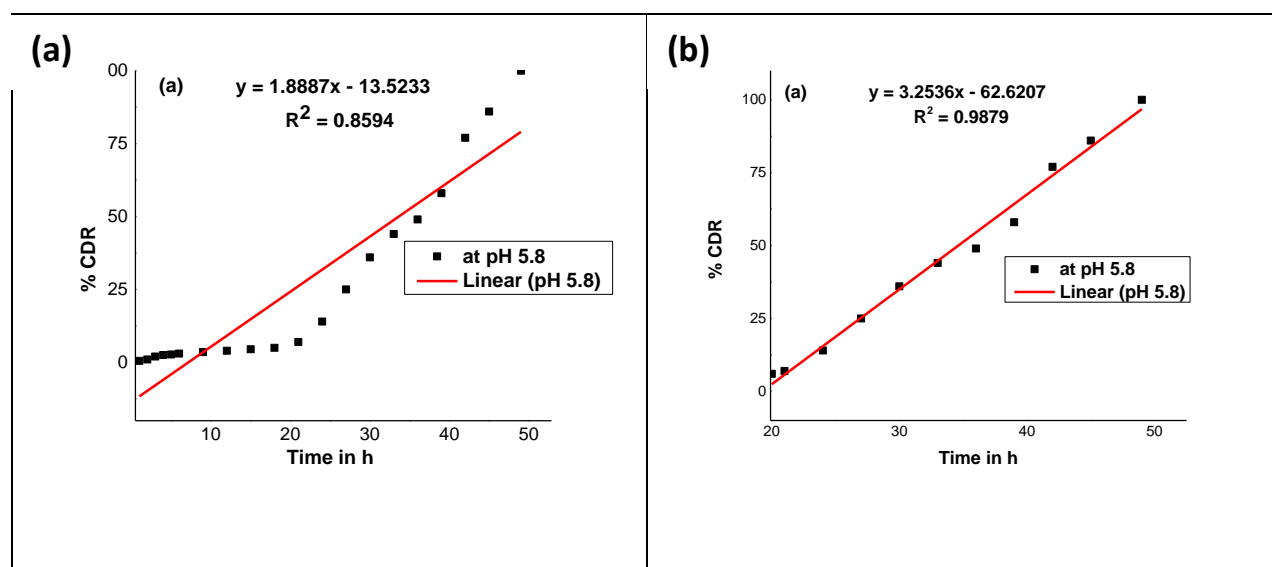

Figure S21. (a) Analysis of the data of release of curcumin from the entrapped organogel of **2b** using zero order kinetic equation. (b) Analysis of the data of release of curcumin from the entrapped organogel of **2b** using zero order kinetic equation from 20 h onwards.



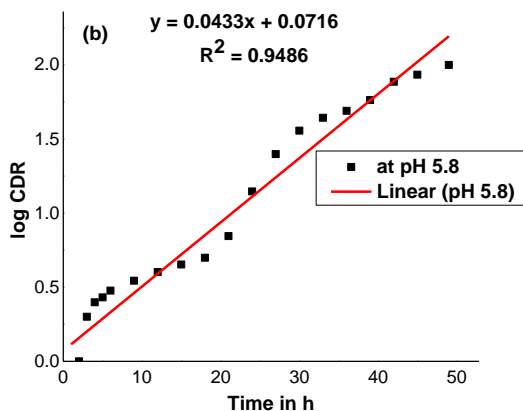

**Figure S22.** Analysis of the data of release of curcumin from the entrapped organogel of **2b** using first order kinetic equation.

## Experimental

### General Procedures

All chemicals, solvents and reagents were procured from commercial source and were used without further purification. Column chromatography was performed by using silica gel (100-200 mesh) under medium pressure. TLC was performed on precoated aluminium plates of silica gel 60-F<sub>254</sub>. TLC spot were visualized by standing with a vaniline solution and subsequent heating on hot plate. <sup>1</sup>H and <sup>13</sup>C NMR spectra are recorded on Bruker AC-400 NMR spectrometer at 400 MHz (<sup>1</sup>H) and 100 MHz (<sup>13</sup>C) in solution of d<sub>6</sub>-DMSO or CDCl<sub>3</sub> using the residual peak of the solvent as internal standard.

#### A: General procedure for synthesis of β-phenolic glycosides (2a-d, 3a-d, 4a-d)

The β-phenolic glycosides **2a-d**, **3a-d** and **4a-d** were synthesized by following the procedure reported previously.<sup>1</sup>

#### B: General procedure for synthesis of α-phenolic glycosides (2'a-d, 3'a-d, 4'a-d) and the β-phenolic glycosides 5a-d:<sup>2</sup>

1,2,3,4-tetra-*O*-acetyl-D-pyranosyl pentose sugar (1.50 g, 4.68 mmol) was dissolved in dichloromethane (DCM, 5 mL) followed by addition of phenol derivatives (0.88 mL, 9.35 mmol) and triflic acid (TfOH) in catalytic amount (30 μL). The solution was stirred at room temperature, the progress of the reaction was monitored by TLC. After 2-12 h, when the reaction was complete, the mixture was quenched with DCM and water, neutralized with sodium bicarbonate and extracted with DCM. The organic extract was then dried over Na<sub>2</sub>SO<sub>4</sub>, filtered and concentrated in *vacuo* to yield the crude product. Subsequently, the 2,3,4-tri-*O*-acetyl-1-phenoxy-α-D-pentose pyranoside was dissolved in methanol (5 mL) and sodium methoxide (0.07 g, 1.29 mmol) was added to the reaction mixture. After 1 h, the mixture was neutralized with amberlite IR 120 H<sup>+</sup> resin. Then the reaction mixture was filtered and concentrated in *vacuo* to yield the crude product. The crude product was

purified by column chromatography using MeOH/CHCl<sub>3</sub> mixture to afford the desired product.

### **Gelation tests**

Gelation test were carried out by heating-cooling method in which exact weights of compounds were added to 1 mL of appropriate solvent in a sample vial. The vial was then sealed and heated to dissolve the compound till a clear solution was obtained. The vial was then set aside and allowed cool to room temperature, after which gelation was tested by inverting the sample vial. If the inverted sample vial was able to hold the weight of the system, it was considered as gel.

### **Determination of Minimum Gelation Concentration (MGC)**

To 1 mL of appropriate solvent taken in 5 mL sample vial, 1 mg of gelator was added in it and heated till the clear solution obtained. The mixture was subjected to heating cooling cycle as described above. If gelation was not observed, the process was repeated with 1 mg increments of the gelator until a gel was formed after a cycle. The minimum weight of the gelator at which the gel was formed was used to report the MGC.

### **Field Emission Scanning Electron Micrographs (FESEM)**

Samples were prepared for FESEM by drop casting a hot 1% (w/v) solution of gelator **2b**, **2d**, **3'a** or **3'd** in *p*-xylene solvent on a glass slide (2mm x 2mm) and drying them overnight in air followed by drying inside a vacuum desiccator. The slides loaded with the xerogels was then placed on a stub which was then coated with gold by Quorum-Q150RES sputter coater under vacuum of 5 x 10<sup>-5</sup> mbar and a current of 20 mA for 2 minutes. Then the FESEM analyses were performed by using a Zeiss supra-55 FESEM.

### **Atomic force microscopy (AFM)**

The AFM experiments carried on a Bruker Dimension Icon instrument with the *p*-xylene xerogels of the gelators **2b**, **2d**, **3'a** and **3'd**. The respective *p*-xylene gel sample was placed on a glass slide (2mm x 2mm) and then dried under vacuum overnight. The AFM image of the samples were obtained using Tapping Mode at 1 Hz scan rate with a silicon cantilever tip (RFESP-MPP-21100-10) at a resonance frequency of 75 kHz and spring constant of 3 Nm<sup>-1</sup>.

### **Rheology**

The rheology of the gel samples were performed on a Bohlin Gemini-2 Malvern rheometer using parallel plates (25 mm, stainless steel) with gaps of 500 micron between the parallel plates. The experiments were carried out for gels of **2b**, **2d**, **3'a** and **3'd** at 1% (w/v) concentration. The gel samples were placed on parallel plate by spatula in such a way that it covered the surface of the parallel plates. The different tests Dynamic Strain Sweep (DSS) and Dynamic Frequency Sweep (DFS) were performed to characterize the mechanical properties of the gels. DSS experiment were carried out at constant frequency of 1 Hz at temperature 25 °C. The strain value was determined at a point where  $\tan \delta = G''/G'$  ( $G'' =$

loss modulus;  $G'$  = storage modulus). Variation of storage modulus ( $G'$ ) was tested within frequency range of 1 Hz to 100 Hz at strain of 0.01% by DFS experiments.

#### **FTIR experiments**

FTIR experiments carried out by Perkin Elmer Spectrum Two FTIR spectrometer. Samples for IR experiments in the crystalline states were prepared by crystallization from  $\text{CH}_2\text{Cl}_2$ -Hexane mixtures. For FTIR experiments in the gel state, the benzene gel of each gelator was analysed on a KBr pellet.

#### **Wide Angle X-ray diffraction (WXR)**

The xerogels of the sample were prepared by drying a *p*-xylene gel of each gelator overnight in a vacuum desiccator. The WXR diffractogram of the samples were recorded on a Prorog AXRD diffractometer. X-rays of wavelength 1.5 Å were used.

#### **UV –Visible Spectroscopy**

UV-spectra were measured in a Shimadzu UV-1800 spectrophotometer wavelength range of 200-600 nm using water as a solvent. For every UV-spectra at a regular time take 2 mL of phosphate buffer in cuvettes from every pH and recorded their spectra, after then transfer it in their respective vial.

#### **Preparation of phosphate buffer solution**

The phosphate buffer solution of different pH for curcumin release study were prepared as follows. A stock solution of 0.1 M monobasic potassium phosphate ( $\text{K}_2\text{HPO}_4$ ) was prepared by dissolving 87.09g in 500 mL deionized water in a volumetric flask and a 0.1 M stock solution of potassium phosphate dibasic ( $\text{KH}_2\text{PO}_4$ ) was prepared by dissolving 68.045g in 500 mL deionized water. The stock solutions were mixed in proportions as indicated in Table S15 to provide the buffers of appropriate buffers. Further, the pH of the buffers were confirmed using a pH meter at 25 °C.

---

**Table S15.** Preparation of phosphate buffers of different pH.

---

| pH  | 0.1 (M)<br>$\text{K}_2\text{HPO}_4$ (mL) | 0.1 (M)<br>$\text{KH}_2\text{PO}_4$ (mL) |
|-----|------------------------------------------|------------------------------------------|
| 8.0 | 9.4                                      | 0.6                                      |
| 7.6 | 8.66                                     | 1.34                                     |
| 7.4 | 8.02                                     | 1.98                                     |
| 7.0 | 6.15                                     | 3.85                                     |
| 5.8 | 0.85 mL                                  | 9.15                                     |

---

## Physical entrapment of curcumin in gels and curcumin release experiments

A stock solution (20 mL) containing 1 mg curcumin per 1 mL of mustard oil was prepared. Then 2 mL of the curcumin-mustard oil solution was transferred into a sample vial and 10 mg of the gelator was added to it. The solution was warmed to dissolve the gelator. Then the solution was allowed to cool to enable the gel formation. After, 1 h 4 mL of the appropriate phosphate buffer was added to the vial. The release of curcumin from the gel matrix to the buffer was measured at intervals of 1 h by physically removing aliquots of the buffer and subjecting it to UV-Vis spectroscopy. After measuring the UV-Vis absorption, the aliquot was reintroduced into the vial containing the curcumin-mustard oil gel.

## Compound characterization data

The characterization data for compounds 1-(phenoxy)- $\beta$ -D-arabinopyranosides (**2a**), 1-(2-methoxyphenoxy)- $\beta$ -D-arabinopyranosides (**2b**) and 1-(3-methoxyphenoxy)- $\beta$ -D-arabinopyranosides (**2c**) were previously reported.<sup>1</sup>

**1-(4-methoxyphenoxy)- $\beta$ -D-arabinopyranosides (2d):** It was synthesized following the general method-A and purified by column chromatography (8% MeOH/CHCl<sub>3</sub>) to afford white solid 1-(4-methoxyphenoxy)- $\beta$ -D-arabinopyranosides (**2d**, 2.25 g; 47%) from compound **1a** (over three steps). m.p. 150 – 152°C [ $\alpha$ ]<sub>D</sub><sup>30</sup> = 4.321 (*c* = 0.632 in MeOH); <sup>1</sup>H NMR (400 MHz, d<sub>6</sub>-DMSO in CDCl<sub>3</sub>)  $\delta$  (ppm) 7.00 – 6.95 (m, 2H), 6.86 – 6.82 (m, 2H), 5.21 (d, *J* = 4.9 Hz, 1H), 4.78 (d, *J* = 5.6 Hz, 1H), 4.70 (d, *J* = 6.9 Hz, 1H), 4.63 (d, *J* = 4.0 Hz, 1H), 3.80 (dd, *J* = 12.1 and 3.0 Hz, 1H), 3.75 (bs, 1H), 3.73 (s, 3H), 3.66 – 3.61 (m, 1H), 3.57 – 3.53 (m, 1H), 3.51 – 3.47 (m, 1H); <sup>13</sup>C NMR (100 MHz, d<sub>6</sub>-DMSO in CDCl<sub>3</sub>)  $\delta$  (ppm) 154.3, 151.1, 117.8(2C), 114.2(2C), 102, 72.5, 70.4, 67.5, 65.5, **55.2**; HRMS calcd. for C<sub>12</sub>H<sub>16</sub>O<sub>6</sub>Na<sup>+</sup> (*M* + Na)<sup>+</sup> 279.0845; found 279.0856.

**1-(phenoxy)- $\beta$ -D-xylopyranosides (3a):** It was synthesized following the general method-A and purified by column chromatography (7% MeOH/CHCl<sub>3</sub>) to afford white solid 1-(phenoxy)- $\beta$ -D-xylopyranosides (**3a**, 1.91 g; 45%) from compound **1b** (over three steps). m.p. 167 – 169°C [ $\alpha$ ]<sub>D</sub><sup>25</sup> = – 35.051 (*c* = 0.533 in MeOH); <sup>1</sup>H NMR (400 MHz, d<sub>6</sub>-DMSO)  $\delta$  (ppm) 7.31 – 7.27 (m, 2H), 7.01 – 6.98 (m, 3H), 5.36 (d, *J* = 4.8 Hz, 1H), 5.15 (d, *J* = 4.0 Hz, 1H), 5.10 (d, *J* = 4.8 Hz, 1H), 4.86 (d, *J* = 7.2 Hz, 1H), 3.75 (dd, *J* = 11.0 and 4.8 Hz, 1H), 3.38 – 3.36 (m, 1H), 3.29 – 3.24 (m, 3H); <sup>13</sup>C NMR (100 MHz, d<sub>6</sub>-DMSO)  $\delta$  (ppm) 157.6, 129.9(2C), 122.3, 116.7(2C), 101.3, 76.9, 73.5, 69.8, **66.1**; HRMS calcd. for C<sub>11</sub>H<sub>14</sub>O<sub>5</sub>Na<sup>+</sup> (*M* + Na)<sup>+</sup> 249.0739; found 249.0658.

**1-(2-methoxyphenoxy)- $\beta$ -D-xylopyranosides (3b):** It was synthesized following the general method-A and purified by column chromatography (9% MeOH/CHCl<sub>3</sub>) to afford white solid 1-(2-methoxyphenoxy)- $\beta$ -D-xylopyranosides (**3b**, 2.11 g; 50%) from compound **1b** (over three steps). m.p. 165 – 167°C [ $\alpha$ ]<sub>D</sub><sup>25</sup> = – 51.418 (*c* = 0.732 in MeOH); <sup>1</sup>H NMR (400 MHz, d<sub>6</sub>-DMSO)  $\delta$  (ppm) 7.04 – 7.02 (m, 1H), 6.99 – 6.93 (m, 2H), 6.88 – 6.84 (m, 1H), 5.33 (d, *J* = 4.8 Hz, 1H), 5.16 – 5.13 (m, 2H), 4.88 (d, *J* = 6.9 Hz, 1H), 3.74 – 3.70 (m, 4H), 3.36 (bs, 1H), 3.29 – 3.18 (m, 3H); <sup>13</sup>C NMR (100 MHz,

d6-DMSO)  $\delta$  (ppm) 149.5, 146.3, 122.6, 120.9, 116.3, 112.9, 101.1, 76.7, 73.2, 69.6, 65.8, 55.8.; HRMS calcd. for  $C_{12}H_{16}O_6Na^+$  (M + Na) $^+$  279.0845; found 279.0851.

**1-(3-methoxyphenoxy)- $\beta$ -D-xylopyranosides (3c):** It was synthesized following the general method-A and purified by column chromatography (9% MeOH/ $CHCl_3$ ) to afford white solid 1-(3-methoxyphenoxy)- $\beta$ -D-xylopyranosides (**3c**, 1.52 g; 36%) from compound **1b** (over three steps). m.p. 161 – 163°C [ $\alpha$ ] $_D^{25} = -63.371$  ( $c = 0.433$  in MeOH);  $^1H$  NMR (400 MHz, d6-DMSO)  $\delta$  (ppm) 7.25 – 7.21 (m, 1H), 6.65 – 6.59 (m, 3H), 5.36 (bs, 1H), 5.15 – 5.11 (m, 2H), 4.89 (t,  $J = 6.8$  Hz, 1H), 3.80 – 3.76 (m, 5H), 3.32 (d,  $J = 10.8$  Hz, 1H), 3.28 – 3.26 (m, 2H);  $^{13}C$  NMR (100 MHz, d6-DMSO)  $\delta$  (ppm) 160.3, 158.3, 129.8, 108.4, 107.4, 102.6, 100.8, 76.4, 73, 69.3, 65.6, 55; HRMS calcd. for  $C_{12}H_{16}O_6Na^+$  (M + Na) $^+$  279.0845; found 279.0853.

**1-(4-methoxyphenoxy)- $\beta$ -D-xylopyranosides (3d):** It was synthesized following the general method-A and purified by column chromatography (9% MeOH/ $CHCl_3$ ) to afford white solid 1-(4-methoxyphenoxy)- $\beta$ -D-xylopyranosides (**3d**, 2.05 g; 49%) from compound **1b** (over three steps). m.p. 171 – 173°C [ $\alpha$ ] $_D^{25} = -78.926$  ( $c = 0.524$  in MeOH);  $^1H$  NMR (400 MHz, d6-DMSO)  $\delta$  (ppm) 7.01 – 6.97 (m, 2H), 6.91 – 6.87 (m, 2H), 5.35 (bs, 1H), 5.13 – 5.09 (m, 2H), 4.75 (t,  $J = 3.7$  Hz, 1H), 3.79 – 3.74 (m, 5H), 3.28 – 3.21 (m, 3H);  $^{13}C$  NMR (100 MHz, d6-DMSO)  $\delta$  (ppm) 154.3, 151.1, 117.8(2C), 114.4(2C), 102.1, 76.4, 73.1, 69.4, 65.6, 55.3; HRMS calcd. for  $C_{12}H_{16}O_6Na^+$  (M + Na) $^+$  279.0845; found 279.0848.

**1-(phenoxy)- $\beta$ -D-lyxopyranosides (4a):** It was synthesized following the general method-A and purified by column chromatography (8% MeOH/ $CHCl_3$ ) to afford white solid 1-(phenoxy)- $\beta$ -D-lyxopyranosides (**4a**, 1.30 g; 31%) from compound **1c** (over three steps). m.p. 129 – 131°C [ $\alpha$ ] $_D^{25} = 58.909$  ( $c = 0.466$  in MeOH);  $^1H$  NMR (400 MHz, d6-DMSO)  $\delta$  (ppm) 7.31 – 7.28 (m, 2H), 7.03 – 6.97 (m, 3H), 5.32 (d,  $J = 2.4$  Hz, 1H), 5.09 (d,  $J = 4.8$  Hz, 1H), 4.95 (bs, 1H), 4.92 (d,  $J = 3.2$  Hz, 1H), 3.85 – 3.62 (m, 4H), 3.37 (d,  $J = 6.8$  Hz, 1H);  $^{13}C$  NMR (100 MHz, d6-DMSO)  $\delta$  (ppm) 156.8, 129.9(2C), 122.3, 116.9(2C), 99, 71.5, 69.7, 67.3, 64.5; HRMS calcd. for  $C_{11}H_{14}O_5Na^+$  (M + Na) $^+$  249.0739; found 249.0667.

**1-(2-methoxyphenoxy)- $\beta$ -D-lyxopyranosides (4b):** It was synthesized following the general method-A and purified by column chromatography (8% MeOH/ $CHCl_3$ ) to afford white solid 1-(2-methoxyphenoxy)- $\beta$ -D-lyxopyranosides (**4b**, 1.25 g; 26%) from compound **1c** (over three steps). m.p. 133 – 135°C [ $\alpha$ ] $_D^{25} = 53.732$  ( $c = 0.400$  in MeOH);  $^1H$  NMR (400 MHz, d6-DMSO)  $\delta$  (ppm) 7.05 – 7.03 (m, 1H), 7.00 – 6.94 (m, 2H), 6.87 – 6.83 (m, 1H), 5.25 (d,  $J = 2.0$  Hz, 1H), 5.02 (d,  $J = 4.8$  Hz, 1H), 4.91 (d,  $J = 4.0$  Hz, 1H), 4.84 (d,  $J = 4.0$  Hz, 1H), 3.82 (bs, 1H), 3.75 (s, 3H), 3.65 (m, 2H), 3.54 (dd,  $J = 12.2$  and 4.0 Hz, 1H);  $^{13}C$  NMR (100 MHz, d6-DMSO)  $\delta$  (ppm) 150.5, 145.7, 123.3, 121.1, 118.2, 113.2, 100, 71.4, 70.2, 66.8, 64.3, 56.1; HRMS calcd. for  $C_{12}H_{16}O_6Na^+$  (M + Na) $^+$  279.0845; found 279.0853.

**1-(3-methoxyphenoxy)- $\beta$ -D-lyxopyranosides (4c):** It was synthesized following the general method-A and purified by column chromatography (8% MeOH/ $CHCl_3$ ) to afford white solid 1-(3-methoxyphenoxy)- $\beta$ -D-lyxopyranosides (**4c**, 1.11 g; 23%) from compound **1c** (over three steps).

m.p. 137 – 139°C [ $\alpha$ ]<sub>D</sub><sup>25</sup> = 55.782 (*c* = 0.333 in MeOH); <sup>1</sup>H NMR (400 MHz, d<sub>6</sub>-DMSO)  $\delta$  (ppm) 7.19 – 7.15 (m, 1H), 6.60 – 6.55 (m, 3H), 5.29 (d, *J* = 3.2 Hz, 1H), 5.07 (d, *J* = 4.8 Hz, 1H), 4.94 (d, *J* = 2.8 Hz, 1H), 4.89 (d, *J* = 4.4 Hz, 1H), 3.77 (bs, 1H), 3.70 (s, 3H), 3.65 – 3.60 (m, 3H), 3.33 (dd, *J* = 9.6 and 8.0 Hz, 1H); <sup>13</sup>C NMR (100 MHz, d<sub>6</sub>-DMSO)  $\delta$  (ppm) 160.8, 158, 130.5, 108.9, 108, 103.1, 99, 71.5, 69.7, 67.3, 64.5, 55.6; HRMS calcd. for C<sub>12</sub>H<sub>16</sub>O<sub>6</sub>Na<sup>+</sup> (*M* + Na)<sup>+</sup> 279.0845; found 279.0851.

**1-(4-methoxyphenoxy)- $\beta$ -D-lyxopyranosides (4d):** It was synthesized following the general method-A and purified by column chromatography (8% MeOH/CHCl<sub>3</sub>) to afford white solid 1-(4-methoxyphenoxy)- $\beta$ -D-lyxopyranosides (**4d**, 1.05 g; 43%) from compound **1c** (over three steps). m.p. 132 – 134°C [ $\alpha$ ]<sub>D</sub><sup>25</sup> = 78.911 (*c* = 0.533 in MeOH); <sup>1</sup>H NMR (400 MHz, d<sub>6</sub>-DMSO)  $\delta$  (ppm) 6.95 – 6.92 (m, 2H), 6.85 – 6.82 (m, 2H), 5.16 (d, *J* = 3.2 Hz, 1H), 5.03 (d, *J* = 4.8 Hz, 1H), 4.92 (d, *J* = 4.4 Hz, 1H), 4.86 (d, *J* = 4.8 Hz, 1H), 3.76 (dd, *J* = 3.7 and 3.2 Hz, 1H), 3.67 (s, 3H), 3.64 – 3.51 (m, 3H), 3.37 – 3.32 (m, 1H); <sup>13</sup>C NMR (100 MHz, d<sub>6</sub>-DMSO)  $\delta$  (ppm) 154.6, 150.7, 118.3(2C), 115(2C), 100, 71.5, 69.8, 67.3, 64.4, 55.8; HRMS calcd. for C<sub>12</sub>H<sub>16</sub>O<sub>6</sub>Na<sup>+</sup> (*M* + Na)<sup>+</sup> 279.0845; found 279.0853.

**1-(phenoxy)- $\beta$ -D-ribosepyranosides (5a):** It was synthesized following the general method-B and purified by column chromatography (5% MeOH/CHCl<sub>3</sub>) to afford white solid 1-(phenoxy)- $\beta$ -D-ribosepyranosides (**5a**, 0.82 g; 77%) from compound **1d** (over two steps). m.p. 123 – 125°C [ $\alpha$ ]<sub>D</sub><sup>25</sup> = – 104.964 (*c* = 0.40 in MeOH); <sup>1</sup>H NMR (400 MHz, d<sub>6</sub>-DMSO)  $\delta$  (ppm) 7.32 – 7.28 (m, 2H), 7.04 – 6.98 (m, 3H), 5.29 (d, *J* = 5.2 Hz, 1H), 5.24 (d, *J* = 2.8 Hz, 1H), 5.00 (d, *J* = 5.6 Hz, 1H), 3.89 – 3.88 (m, 1H), 3.73 – 3.56 (m, 4H); <sup>13</sup>C NMR (100 MHz, d<sub>6</sub>-DMSO)  $\delta$  (ppm) 156.8, 129.6(2C), 122, 116.6, 116.4, 98.6, 70.4, 68.2, 68, 64; HRMS calcd. for C<sub>11</sub>H<sub>14</sub>O<sub>5</sub>Na<sup>+</sup> (*M* + Na)<sup>+</sup> 249.0739; found 249.0738.

**1-(2-methoxyphenoxy)- $\beta$ -D-ribosepyranosides (5b):** It was synthesized following the general method-B and purified by column chromatography (6% MeOH/CHCl<sub>3</sub>) to afford white solid 1-(2-methoxyphenoxy)- $\beta$ -D-ribosepyranosides (**5b**, 0.95 g; 79%) from compound **1d** (over two steps). m.p. 128 – 130°C [ $\alpha$ ]<sub>D</sub><sup>25</sup> = – 108.716 (*c* = 0.266 in MeOH); <sup>1</sup>H NMR (400 MHz, d<sub>6</sub>-DMSO)  $\delta$  (ppm) 7.08 – 7.06 (m, 1H), 7.00 – 6.96 (m, 2H), 6.89 – 6.85 (m, 1H), 5.32 (d, *J* = 4 Hz, 1H), 5.15 (d, *J* = 7.6 Hz, 1H), 5.08 (d, *J* = 6 Hz, 1H), 5.01 (d, *J* = 5.2 Hz, 1H), 3.86 – 3.84 (m, 1H), 3.77 – 3.66 (m, 6H), 3.60 (dd, *J* = 12.0 and 6.0 Hz, 1H); <sup>13</sup>C NMR (100 MHz, d<sub>6</sub>-DMSO)  $\delta$  (ppm) 150, 145.5, 122.9, 120.7, 117.5, 112.7, 99.6, 70.6, 68.6, 66.8, 64.4, 55.7; HRMS calcd. for C<sub>12</sub>H<sub>16</sub>O<sub>6</sub>Na<sup>+</sup> (*M* + Na)<sup>+</sup> 279.0845; found 279.0850.

**1-(3-methoxyphenoxy)- $\beta$ -D-ribosepyranosides (5c):** It was synthesized following the general method-B and purified by column chromatography (6% MeOH/CHCl<sub>3</sub>) to afford white solid 1-(3-methoxyphenoxy)- $\beta$ -D-ribosepyranosides (**5c**, 0.89 g; 74%) from compound **1d** (over two steps). m.p. 127 – 129°C [ $\alpha$ ]<sub>D</sub><sup>25</sup> = – 76.474 (*c* = 0.20 in MeOH); <sup>1</sup>H NMR (400 MHz, d<sub>6</sub>-DMSO)  $\delta$  (ppm) 7.21 – 7.17 (m, 1H), 6.61 – 6.57 (m, 3H), 5.27 (d, *J* = 4.8 Hz, 1H), 5.17 (d, *J* = 6.8 Hz, 1H), 4.99 (bs, 2H), 3.86 (bs, 1H), 3.72 – 3.56 (m, 7H), 3.28 – 3.26 (m, 2H); <sup>13</sup>C NMR (100 MHz, d<sub>6</sub>-DMSO)  $\delta$  (ppm) 160.4, 158, 130, 108.5, 107.6, 102.7, 98.6, 70.4, 68(2C), 64.1, 55.2; HRMS calcd. for C<sub>12</sub>H<sub>16</sub>O<sub>6</sub>Na<sup>+</sup> (*M* + Na)<sup>+</sup> 279.0845; found 279.0856.

**1-(4-methoxyphenoxy)- $\beta$ -D-ribosepyranosides (5d):** It was synthesized following the general method-B and purified by column chromatography (6% MeOH/CHCl<sub>3</sub>) to afford white solid 1-(4-

methoxyphenoxy)- $\beta$ -D-ribofuranosides (**5d**, 1.05 g; 88%) from compound **1d** (over two steps). m.p. 131 – 133°C [ $\alpha$ ]<sub>D</sub><sup>25</sup> = – 99.576 (*c* = 0.333 in MeOH); <sup>1</sup>H NMR (400 MHz, d<sub>6</sub>-DMSO)  $\delta$  (ppm) 6.98 – 6.94 (m, 2H), 6.87 – 6.84 (m, 2H), 5.16 – 5.14 (m, 2H), 4.98 – 4.95 (m, 2H), 3.87 – 3.84 (m, 1H), 3.69 – 3.53 (m, 7H); <sup>13</sup>C NMR (100 MHz, d<sub>6</sub>-DMSO)  $\delta$  (ppm) 154.4, 150.7, 117.9(2C), 114.5(2C), 99.7, 70.5, 68.1, 68, 64, 55.4; HRMS calcd. for C<sub>12</sub>H<sub>16</sub>O<sub>6</sub>Na<sup>+</sup> (*M* + Na)<sup>+</sup> 279.0845; found 279.0862.

**1-(phenoxy)- $\alpha$ -D-arabinopyranosides (**2'a**):** It was synthesized following the general method-B and purified by column chromatography (6% MeOH/CHCl<sub>3</sub>) to afford white solid 1-(phenoxy)- $\alpha$ -D-arabinopyranosides (**2'a**, 0.91 g; 86%) from compound **1a** (over two steps). m.p. 136 – 138°C [ $\alpha$ ]<sub>D</sub><sup>25</sup> = – 101.616 (*c* = 0.266 in MeOH); <sup>1</sup>H NMR (400 MHz, d<sub>6</sub>-DMSO)  $\delta$  (ppm) 7.31 – 7.27 (m, 2H), 7.05 – 6.96 (m, 3H), 5.45 (d, *J* = 2.4 Hz, 1H), 4.97 (d, *J* = 5.2 Hz, 1H), 4.79 (d, *J* = 5.2 Hz, 1H), 4.70 (d, *J* = 3.6 Hz, 1H), 3.80 – 3.78 (bs, 3H), 3.70 (d, *J* = 12.0 Hz, 1H), 3.51 (dd, *J* = 12.0 and 2.4 Hz, 1H); <sup>13</sup>C NMR (100 MHz, d<sub>6</sub>-DMSO)  $\delta$  (ppm) 157.5, 129.9(2C), 122.1, 117.1(2C), 98.5, 69.3, 68.7, 68.6, 64.4; HRMS calcd. for C<sub>11</sub>H<sub>14</sub>O<sub>5</sub>Na<sup>+</sup> (*M* + Na)<sup>+</sup> 249.0739; found 249.0738.

**1-(2-methoxyphenoxy)- $\alpha$ -D-arabinopyranosides (**2'b**):** It was synthesized following the general method-B and purified by column chromatography (7% MeOH/CHCl<sub>3</sub>) to afford white solid 1-(2-methoxyphenoxy)- $\alpha$ -D-arabinopyranosides (**2'b**, 0.95 g; 79%) from compound **1a** (over two steps). m.p. 136 – 138°C [ $\alpha$ ]<sub>D</sub><sup>25</sup> = – 107.471 (*c* = 0.333 in MeOH); <sup>1</sup>H NMR (400 MHz, d<sub>6</sub>-DMSO)  $\delta$  (ppm) 7.01 – 7.08 (m, 1H), 7.00 – 6.94 (m, 2H), 6.89 – 6.85 (m, 1H), 5.44 (d, *J* = 2.4 Hz, 1H), 4.85 (d, *J* = 5.2 Hz, 1H), 4.81 (d, *J* = 4.8 Hz, 1H), 4.65 (d, *J* = 2.8 Hz, 1H), 3.81 – 3.78 (m, 7H), 3.47 (dd, *J* = 12.0 and 2.4 Hz, 1H); <sup>13</sup>C NMR (100 MHz, DMSO-d<sub>6</sub>)  $\delta$  (ppm) 150.6, 146.6, 123.0, 121.3, 117.8, 113.4, 99.4, 69.2, 68.8, 68.7, 64.6, 56.3; HRMS calcd. for C<sub>12</sub>H<sub>16</sub>O<sub>6</sub>Na<sup>+</sup> (*M* + Na)<sup>+</sup> 279.0845; found 279.0858.

**1-(3-methoxyphenoxy)- $\alpha$ -D-arabinopyranosides (**2'c**):** It was synthesized following the general method-B and purified by column chromatography (7% MeOH/CHCl<sub>3</sub>) to afford white solid 1-(3-methoxyphenoxy)- $\alpha$ -D-arabinopyranosides (**2'c**, 0.85 g; 71%) from compound **1a** (over two steps). m.p. 142 – 144°C [ $\alpha$ ]<sub>D</sub><sup>25</sup> = – 119.239 (*c* = 0.133 in MeOH); <sup>1</sup>H NMR (400 MHz, d<sub>6</sub>-DMSO)  $\delta$  (ppm) 7.20 – 7.16 (m, 1H), 6.64 – 6.56 (m, 3H), 5.44 (s, 1H), 4.95 (bs, 1H), 4.82 – 4.77 (m, 1H), 4.69 (bs, 1H), 3.78 (s, 3H), 3.74 – 3.67 (m, 4H), 3.50 (dd, *J* = 11.6 and 1.6 Hz, 1H); <sup>13</sup>C NMR (100 MHz, d<sub>6</sub>-DMSO)  $\delta$  (ppm) 160.7, 158.7, 130.3, 109.2, 107.8, 103.2, 98.5, 69.3, 68.7, 68.6, 64.5, 55.5; HRMS calcd. for C<sub>12</sub>H<sub>16</sub>O<sub>6</sub>Na<sup>+</sup> (*M* + Na)<sup>+</sup> 279.0845; found 279.0856.

**1-(4-methoxyphenoxy)- $\alpha$ -D-arabinopyranosides (**2'd**):** It was synthesized following the general method-B and purified by column chromatography (6% MeOH/CHCl<sub>3</sub>) to afford white solid 1-(4-methoxyphenoxy)- $\alpha$ -D-arabinopyranosides (**2'd**, 0.98 g; 82%) from compound **1a** (over two steps). m.p. 139 – 141°C [ $\alpha$ ]<sub>D</sub><sup>25</sup> = – 121.321 (*c* = 0.266 in MeOH); <sup>1</sup>H NMR (400 MHz, d<sub>6</sub>-DMSO)  $\delta$  (ppm) 7.00 – 6.94 (m, 2H), 6.87 – 6.84 (m, 2H), 5.30 (d, *J* = 2.4 Hz, 1H), 4.91 (d, *J* = 6.0 Hz, 1H), 4.74 (d, *J* = 4.8 Hz, 1H), 4.66 (d, *J* = 3.2 Hz, 1H), 3.79 – 3.74 (m, 3H), 3.71 – 3.69 (m, 4H), 3.50 (dd, *J* = 12.0 and 2.0 Hz, 1H); <sup>13</sup>C NMR (100 MHz, d<sub>6</sub>-DMSO)  $\delta$  (ppm) 154.7, 151.4, 118.5(2C), 114.9(2C), 99.5, 69.4, 68.8, 68.7, 64.3, 55.8; HRMS calcd. for C<sub>12</sub>H<sub>16</sub>O<sub>6</sub>Na<sup>+</sup> (*M* + Na)<sup>+</sup> 279.0845; found 279.0841.

**1-(phenoxy)- $\alpha$ -D-xylopyranosides (3'a):** It was synthesized following the general method-B and purified by column chromatography (6% MeOH/CHCl<sub>3</sub>) to afford white solid 1-(phenoxy)- $\alpha$ -D-xylopyranosides (3'a, 0.58 g; 55%) from compound **1b** (over two steps). m.p. 153 – 155°C [ $\alpha$ ]<sub>D</sub><sup>25</sup> = 127.887 (*c* = 0.466 in MeOH); <sup>1</sup>H NMR (400 MHz, d<sub>6</sub>-DMSO)  $\delta$  (ppm) 7.32 – 7.27 (m, 2H), 7.06 – 6.98 (m, 3H), 5.42 (d, *J* = 3.6 Hz, 1H), 5.13 (bs, 1H), 5.06 (d, *J* = 4.4 Hz, 1H), 5.02 (d, *J* = 4.8 Hz, 1H), 3.60 (td, *J* = 8.8 and 4.8 Hz, 1H), 3.51 (d, *J* = 4.8 Hz, 1H), 3.43 – 3.34 (m, 5H); <sup>13</sup>C NMR (100 MHz, d<sub>6</sub>-DMSO)  $\delta$  (ppm) 157.3, 129.9(2C), 122.3, 117.1(2C), 97.9, 73.7, 72, 70.1, 63.1; HRMS calcd. for C<sub>11</sub>H<sub>14</sub>O<sub>5</sub>Na<sup>+</sup> (*M* + Na)<sup>+</sup> 249.0739; found 249.0770.

**1-(2-methoxyphenoxy)- $\alpha$ -D-xylopyranosides (3'b):** It was synthesized following the general method-B and purified by column chromatography (7% MeOH/CHCl<sub>3</sub>) to afford white solid 1-(2-methoxyphenoxy)- $\alpha$ -D-xylopyranosides (3'b, 0.49 g; 41%) from compound **1b** (over two steps). m.p. 159 – 161°C [ $\alpha$ ]<sub>D</sub><sup>25</sup> = 110.401 (*c* = 0.533 in MeOH); <sup>1</sup>H NMR (400 MHz, d<sub>6</sub>-DMSO)  $\delta$  (ppm) 7.10 – 7.08 (m, 1H), 7.07 – 6.95 (m, 2H), 6.89 – 6.85 (m, 1H), 5.41 (d, *J* = 3.6 Hz, 1H), 5.07 (d, *J* = 5.2 Hz, 1H), 5.04 – 5.00 (m, 2H), 3.75 (s, 3H), 3.62 – 3.59 (m, 1H), 3.49 – 3.43 (m, 2H), 3.41 – 3.35 (m, 2H); <sup>13</sup>C NMR (100 MHz, d<sub>6</sub>-DMSO)  $\delta$  (ppm) 150.5, 146.4, 123, 121.3, 117.7, 113.5, 98.8, 73.6, 72.2, 70.1, 63.2, 56.3; HRMS calcd. for C<sub>12</sub>H<sub>16</sub>O<sub>6</sub>Na<sup>+</sup> (*M* + Na)<sup>+</sup> 279.0845; found 279.0851.

**1-(3-methoxyphenoxy)- $\alpha$ -D-xylopyranosides (3'c):** It was synthesized following the general method-B and purified by column chromatography (7% MeOH/CHCl<sub>3</sub>) to afford white solid 1-(3-methoxyphenoxy)- $\alpha$ -D-xylopyranosides (3'c, 0.56 g; 47%) from compound **1b** (over two steps). m.p. 149 – 151°C [ $\alpha$ ]<sub>D</sub><sup>25</sup> = 127.211 (*c* = 0.466 in MeOH); <sup>1</sup>H NMR (400 MHz, d<sub>6</sub>-DMSO)  $\delta$  (ppm) 7.21 – 7.17 (m, 1H), 6.64 – 6.56 (m, 3H), 5.40 (d, *J* = 3.6 Hz, 1H), 5.08 (d, *J* = 6.4 Hz, 1H), 4.05 (d, *J* = 4.8 Hz, 1H), 5.00 (d, *J* = 4.8 Hz, 1H), 3.72 (s, 3H), 3.58 – 3.53 (m, 1H), 3.50 – 3.48 (m, 1H), 3.39 – 3.31 (m, 3H); <sup>13</sup>C NMR (100 MHz, d<sub>6</sub>-DMSO)  $\delta$  (ppm) 160.8, 158.5, 130.4, 109.2, 108, 103.2, 97.9, 73.7, 72, 70.1, 63.1, 55.6; HRMS calcd. for C<sub>12</sub>H<sub>16</sub>O<sub>6</sub>Na<sup>+</sup> (*M* + Na)<sup>+</sup> 279.0845; found 279.0854.

**1-(4-methoxyphenoxy)- $\alpha$ -D-xylopyranosides (3'd):** It was synthesized following the general method-B and purified by column chromatography (7% MeOH/CHCl<sub>3</sub>) to afford white solid 1-(4-methoxyphenoxy)- $\alpha$ -D-xylopyranosides (3'd, 0.72 g; 60%) from compound **1b** (over two steps). m.p. 156 – 158°C [ $\alpha$ ]<sub>D</sub><sup>25</sup> = 138.226 (*c* = 0.733 in MeOH); <sup>1</sup>H NMR (400 MHz, d<sub>6</sub>-DMSO)  $\delta$  (ppm) 6.94 – 6.92 (m, 2H), 6.74 – 6.72 (m, 2H), 5.23 (d, *J* = 3.0 Hz, 1H), 4.84 (bs, 1H), 4.75 – 4.73 (m, 2H), 3.67 – 3.66 (m, 4H), 3.53 – 3.44 (m, 4H); <sup>13</sup>C NMR (100 MHz, d<sub>6</sub>-DMSO)  $\delta$  (ppm) 154.6, 151, 118.3(2C), 114.4(2C), 98.8, 73.8, 71.9, 70, 62.7, 55.4; HRMS calcd. for C<sub>12</sub>H<sub>16</sub>O<sub>6</sub>Na<sup>+</sup> (*M* + Na)<sup>+</sup> 279.0845; found 279.0863.

**1-(phenoxy)- $\alpha$ -D-lyxopyranosides (4'a):** It was synthesized following the general method-B and purified by column chromatography (7% MeOH/CHCl<sub>3</sub>) to afford white solid 1-(phenoxy)- $\alpha$ -D-lyxopyranosides (4'a, 0.82 g; 77%) from compound **1c** (over two steps). m.p. 144 – 146°C [ $\alpha$ ]<sub>D</sub><sup>25</sup> = 56.981 (*c* = 0.533 in MeOH); <sup>1</sup>H NMR (400 MHz, d<sub>6</sub>-DMSO)  $\delta$  (ppm) 7.32 – 7.27 (m, 2H), 7.03 – 6.97 (m, 3H), 5.32 (d, *J* = 3.6 Hz, 1H), 5.08 (d, *J* = 5.2 Hz, 1H), 4.95 (d, *J* = 4.4 Hz, 1H), 4.90 (d, *J* = 4.8 Hz, 1H), 3.80 (dd, *J* = 4.0 and 3.6 Hz, 1H) 3.70 – 3.61 (m, 3H), 3.36 (dd, *J* = 10.2 and 7.6 Hz, 1H); <sup>13</sup>C NMR



(100 MHz, d6-DMSO)  $\delta$  (ppm) 156.8, 130(2C), 122.3, 116.9(2C), 99.0, 71.5, 69.7, 67.3, 64.5; HRMS calcd. for  $C_{11}H_{14}O_5Na^+$  (M + Na)<sup>+</sup> 249.0739; found 249.0742.

**1-(2-methoxyphenoxy)- $\alpha$ -D-lyxopyranosides (4'b):** It was synthesized following the general method-B and purified by column chromatography (7% MeOH/CHCl<sub>3</sub>) to afford white solid 1-(2-methoxyphenoxy)- $\alpha$ -D-lyxopyranosides (**4'b**, 0.91 g; 76%) from compound **1c** (over two steps). m.p. 145 – 147°C [ $\alpha$ ]<sub>D</sub><sup>25</sup> = 13.795 (*c* = 0.333 in MeOH); <sup>1</sup>H NMR (400 MHz, d6-DMSO)  $\delta$  (ppm) 7.07 – 6.96 (m, 3H), 6.89 – 6.84 (m, 1H), 5.28 (d, *J* = 2.8 Hz, 1H), 5.04(d, *J* = 4.8 Hz, 1H), 4.93 (d, *J* = 4.0 Hz, 1H), 4.87 (d, *J* = 4.4 Hz, 1H), 3.85 (t, *J* = 2.0 Hz, 1H), 3.68(m, 2H), 3.57(dd, *J* = 11.0 and 3.2 Hz, 1H), 3.42 (s, 3H); <sup>13</sup>C NMR (100 MHz, d6-DMSO)  $\delta$  (ppm) 150.5, 145.7, 123.3, 121.1, 118.2, 113.2, 100, 71.4, 70.1, 66.9, 64.3, 56.1; HRMS calcd. for  $C_{12}H_{16}O_6Na^+$  (M + Na)<sup>+</sup> 279.0845; found 279.0851.

**1-(3-methoxyphenoxy)- $\alpha$ -D-lyxopyranosides (4'c):** It was synthesized following the general method-B and purified by column chromatography (8% MeOH/CHCl<sub>3</sub>) to afford white solid 1-(3-methoxyphenoxy)- $\alpha$ -D-lyxopyranosides (**4'c**, 0.82 g; 68%) from compound **1c** (over two steps). m.p. 140 – 142°C [ $\alpha$ ]<sub>D</sub><sup>25</sup> = 59.646 (*c* = 0.600 in MeOH); <sup>1</sup>H NMR (400 MHz, d6-DMSO)  $\delta$  (ppm) 7.21 – 7.17 (m, 1H), 6.62 – 6.57 (m, 3H), 5.31 (d, *J* = 3.6 Hz, 1H), 3.79 – 3.72 (m, 1H), 3.68 – 3.62 (m, 8H), 3.35 (dd, *J* = 9.0 and 7.6 Hz, 1H); <sup>13</sup>C NMR (100 MHz, d6-DMSO)  $\delta$  (ppm) 160.8, 158, 130.5, 108.9, 108, 103.1, 99, 71.5, 69.7, 67.3, 64.5, 55.6; HRMS calcd. for  $C_{12}H_{16}O_6Na^+$  (M + Na)<sup>+</sup> 279.0845; found 279.0849.

**1-(4-methoxyphenoxy)- $\alpha$ -D-lyxopyranosides (4'd):** It was synthesized following the general method-B and purified by column chromatography (8% MeOH/CHCl<sub>3</sub>) to afford white solid (**4'd**, 0.99 g, 83%) from compound **1c** (over two steps). m.p. 149 – 151°C [ $\alpha$ ]<sub>D</sub><sup>25</sup> = 95.717 (*c* = 0.40 in MeOH); <sup>1</sup>H NMR (400 MHz, d6-DMSO)  $\delta$  (ppm) 6.97– 6.94 (m, 2H), 6.88 – 6.84 (m, 2H), 5.18 (d, *J* = 3.2 Hz, 1H), 5.05 (d, *J* = 4.8 Hz, 1H), 4.93 – 4.88 (m, 2H), 3.78 (bs, 1H), 3.70 (s, 3H), 3.66 – 3.65 (m, 2H), 3.60 (dd, *J* = 9.4 and 3.6 Hz, 1H), 3.37 – 3.36 (m, 1H); <sup>13</sup>C NMR (100 MHz, d6-DMSO)  $\delta$  (ppm) 154.8, 150.7, 118.3(2C), 115(2C), 100, 71.5, 69.8, 67.3, 64.4, 55.8; HRMS calcd. for  $C_{12}H_{16}O_6Na^+$  (M + Na)<sup>+</sup> 279.0845; found 279.0851.

## Reference

1. N. P. Pathak, Rajkamal and S. Yadav, *Chem. Commun.*, 2020, **56**, 2999.
2. S. Escopy, Y. Singh and A. V. Demchenko, *Org. Biomol. Chem.*, 2019, **17**, 8379-8383.

# 1H an 13C- NMR spectra

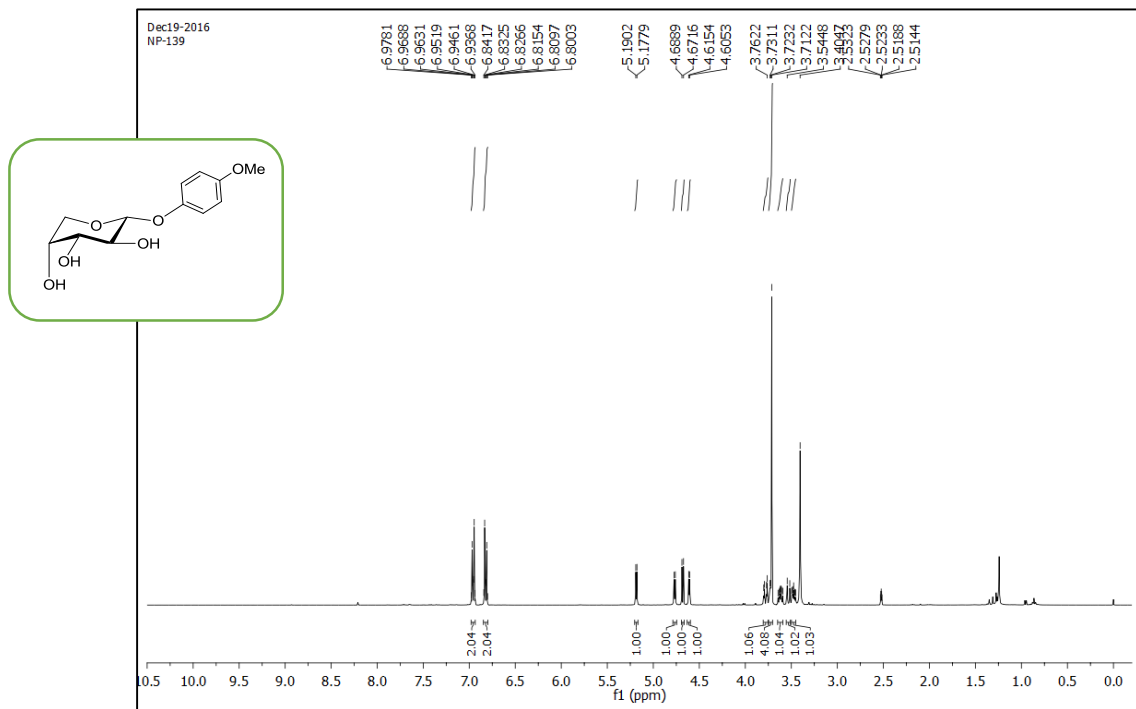

Figure S23. <sup>1</sup>H-NMR (400 MHz, DMSO-d<sub>6</sub>) spectra of 2d.

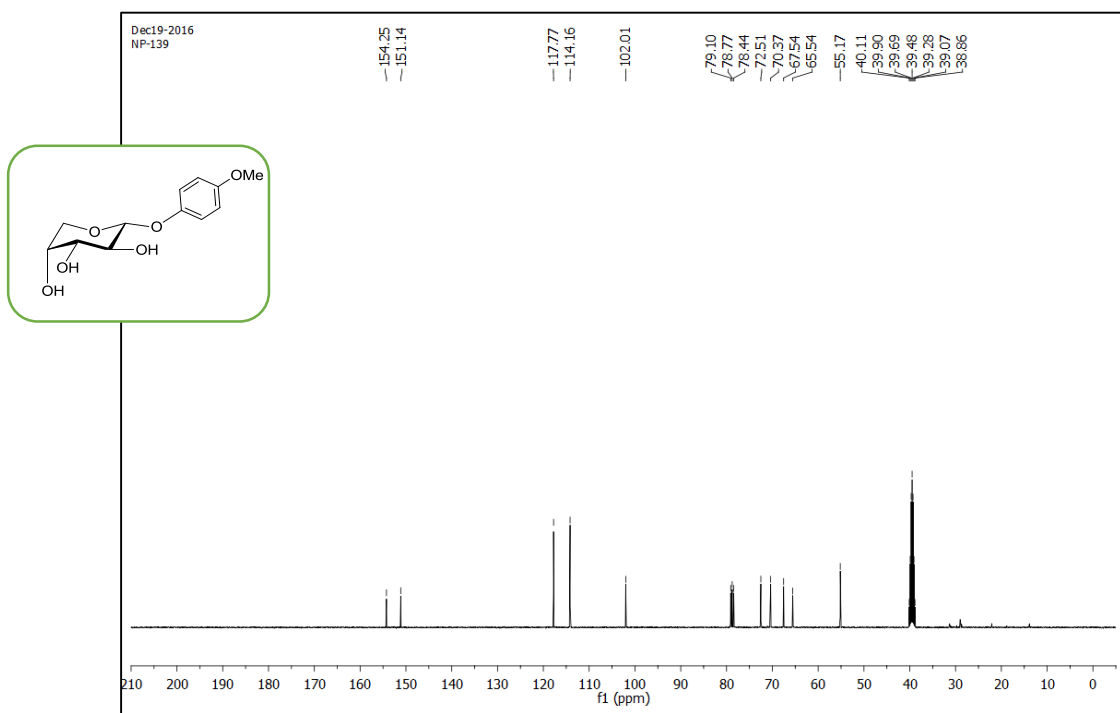

Figure S24. <sup>13</sup>C-NMR (100 MHz, DMSO-d<sub>6</sub>) spectra of 2d.

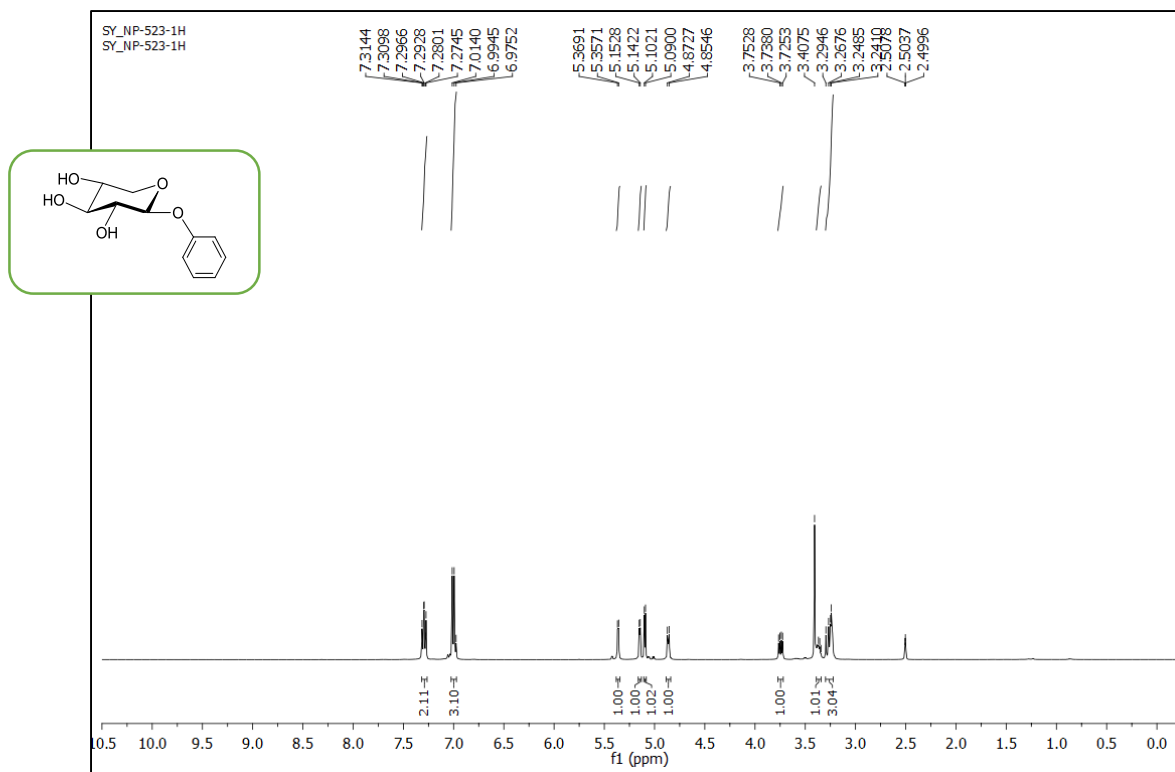

Figure S25.  $^1\text{H-NMR}$  (400 MHz, DMSO- $d_6$ ) spectra of **3a**.

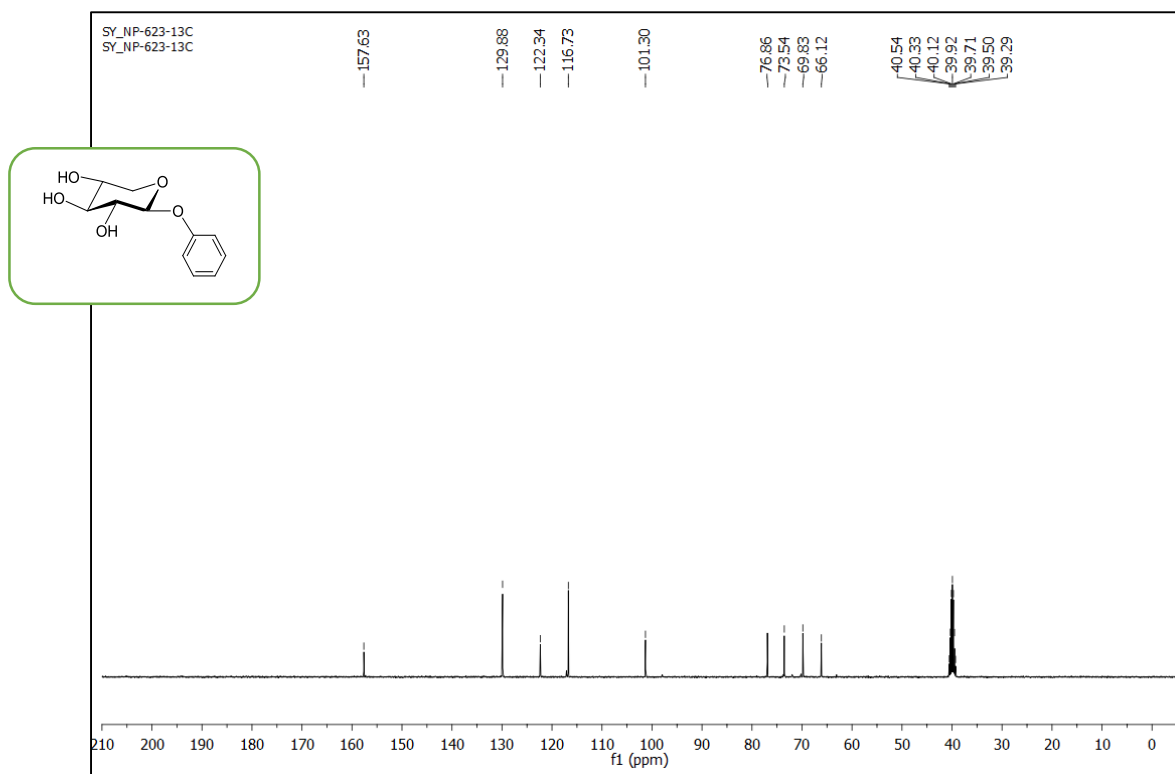

Figure S26.  $^{13}\text{C-NMR}$  (100 MHz, DMSO- $d_6$ ) spectra of **3a**.

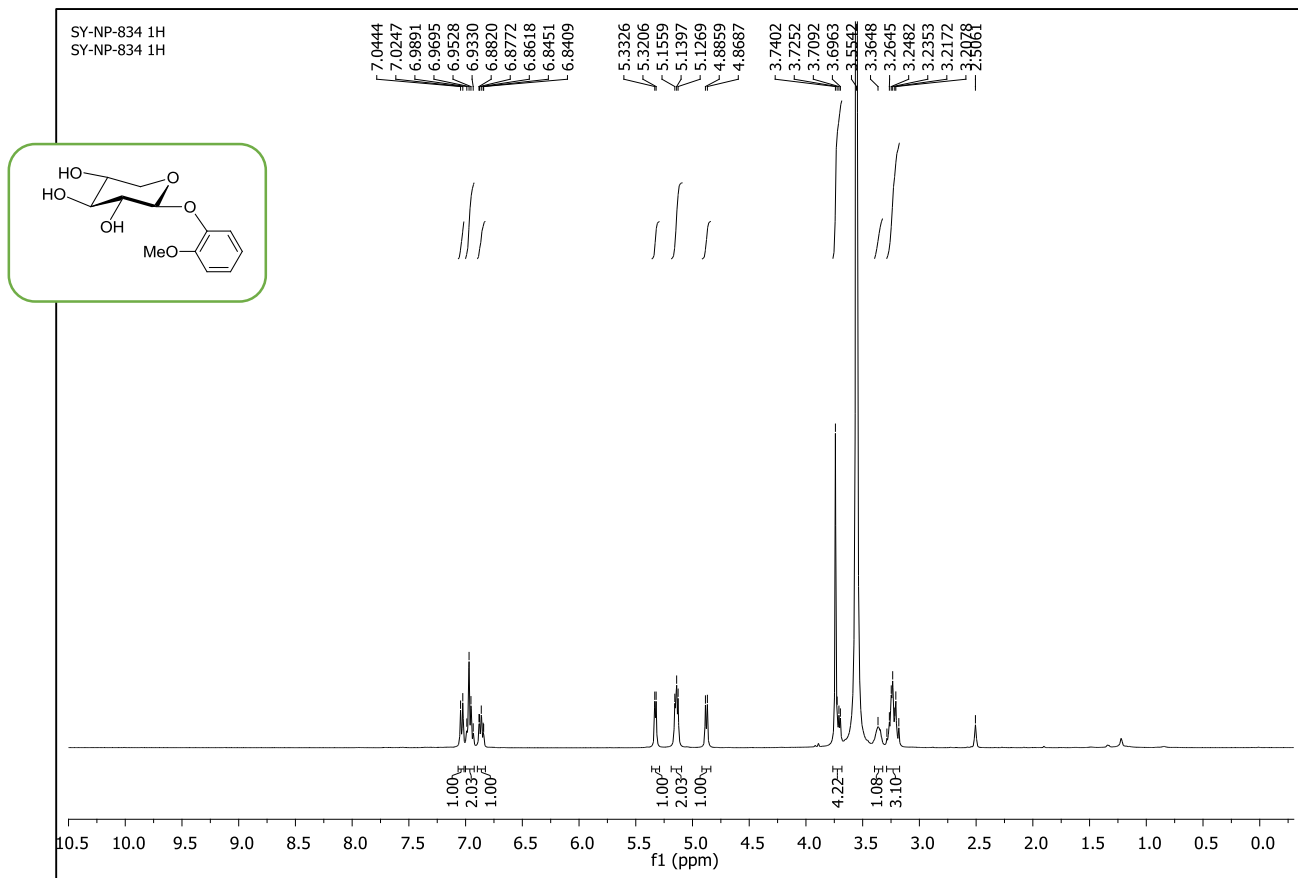

Figure S27.  $^1\text{H-NMR}$  (400 MHz, DMSO- $d_6$ ) spectra of **3b**.

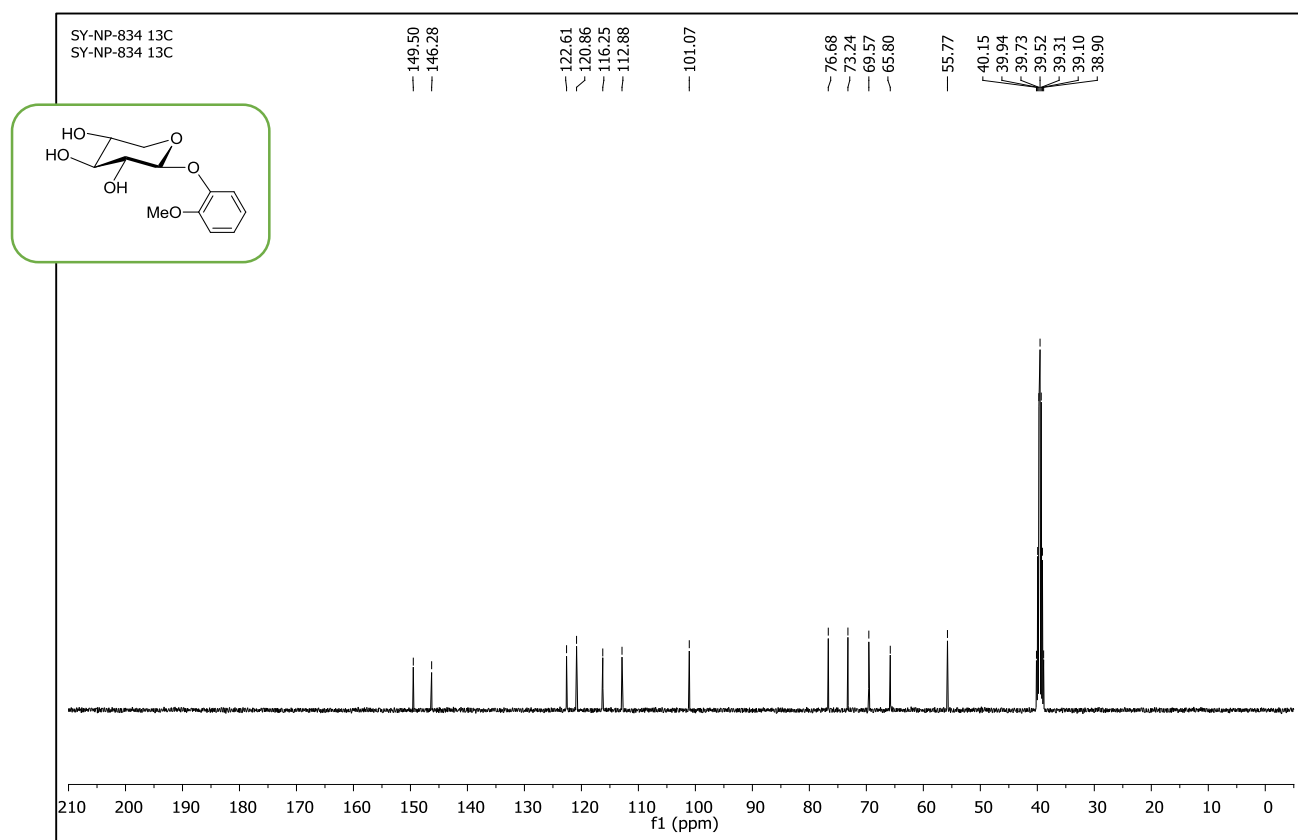

Figure S28.  $^{13}\text{C-NMR}$  (100 MHz, DMSO- $d_6$ ) spectra of **3b**.

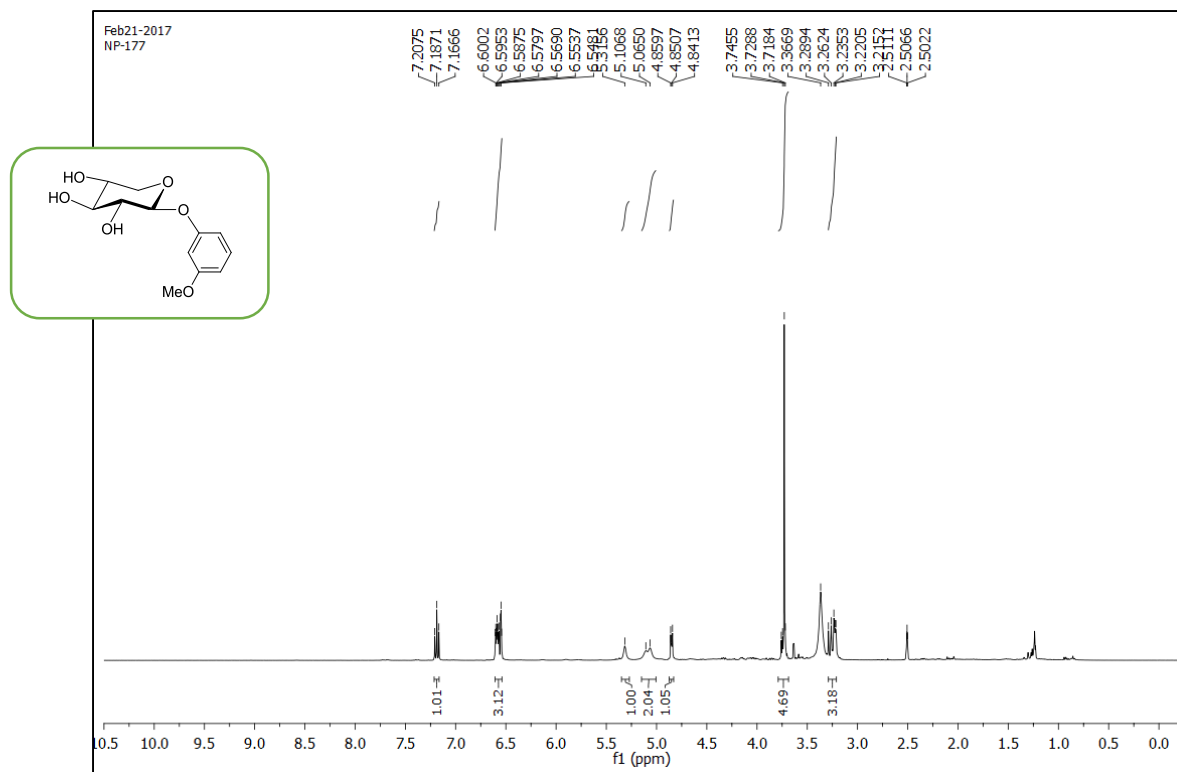

Figure S29. <sup>1</sup>H-NMR (400 MHz, DMSO-d<sub>6</sub>) spectra of 3c.

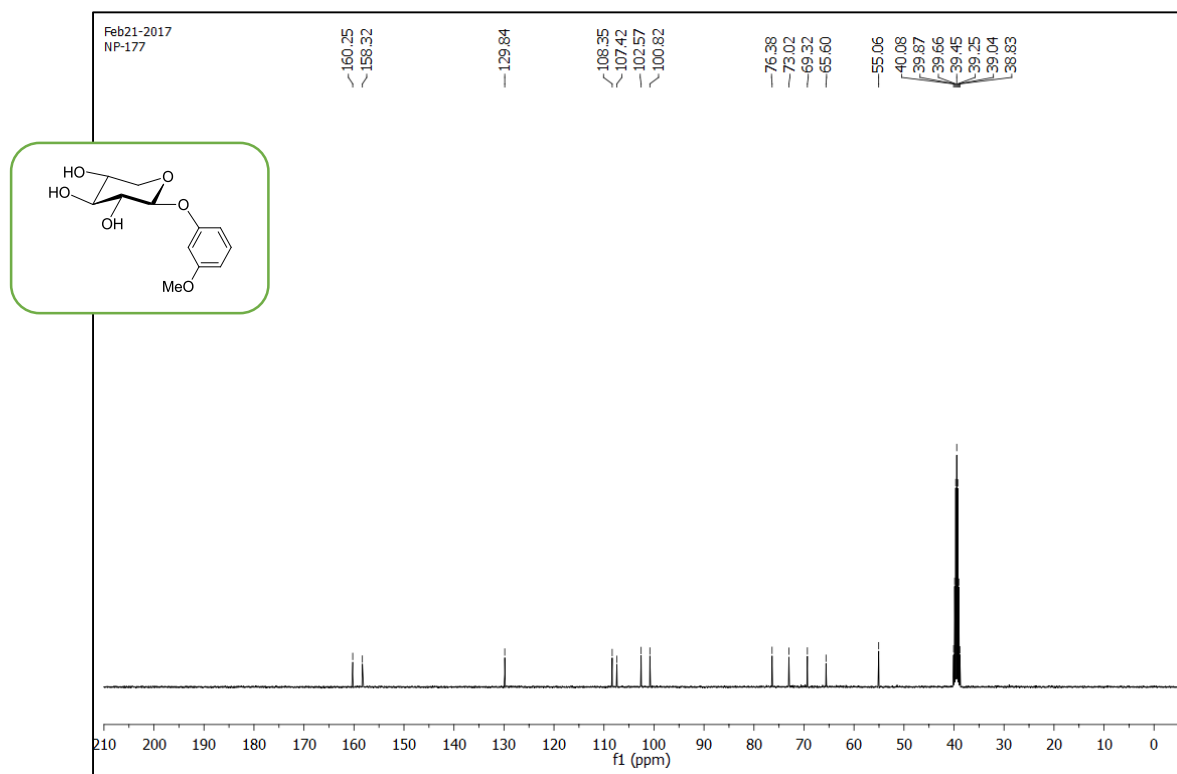

Figure S30. <sup>13</sup>C-NMR (100 MHz, DMSO-d<sub>6</sub>) spectra of 3c.

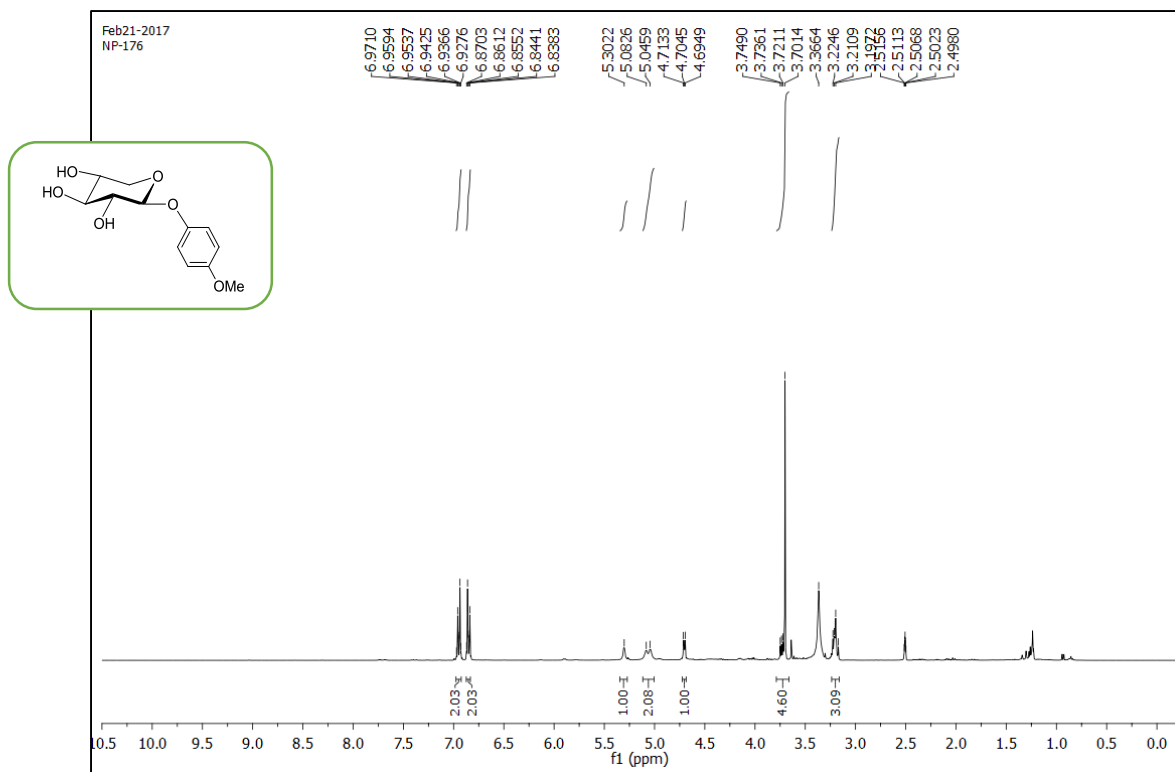

Figure S31.  $^1\text{H-NMR}$  (400 MHz,  $\text{DMSO-d}_6$ ) spectra of **3d**.

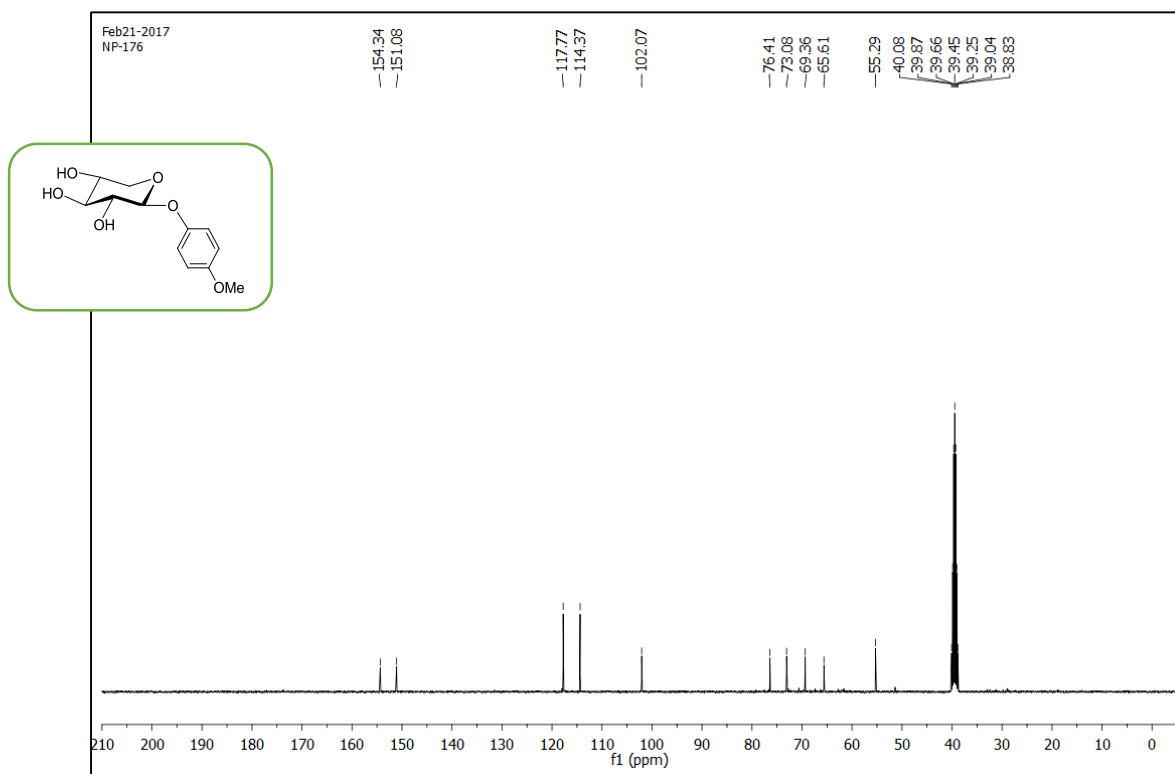

Figure S32.  $^{13}\text{C-NMR}$  (100 MHz,  $\text{DMSO-d}_6$ ) spectra of **3d**.

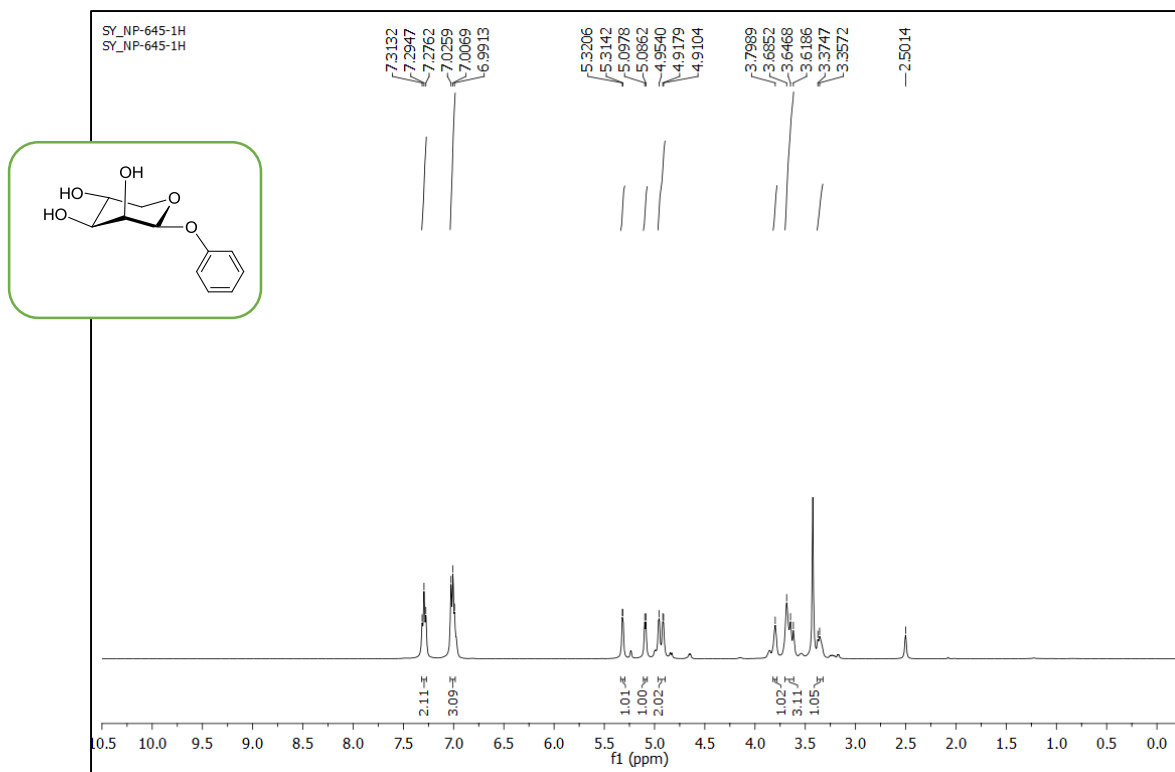

**Figure S33.**  $^1\text{H-NMR}$  (400 MHz, DMSO-d<sub>6</sub>) spectra of **4a**.

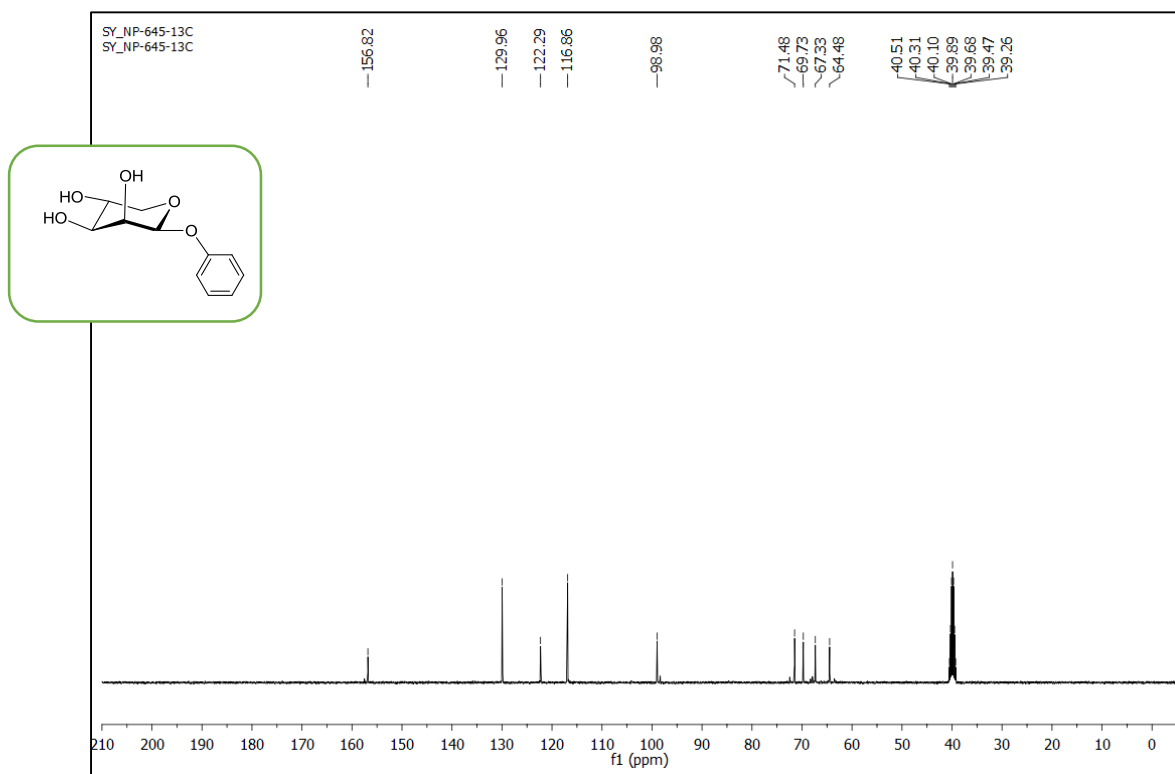

**Figure S34.**  $^{13}\text{C-NMR}$  (100 MHz, DMSO-d<sub>6</sub>) spectra of **4a**.

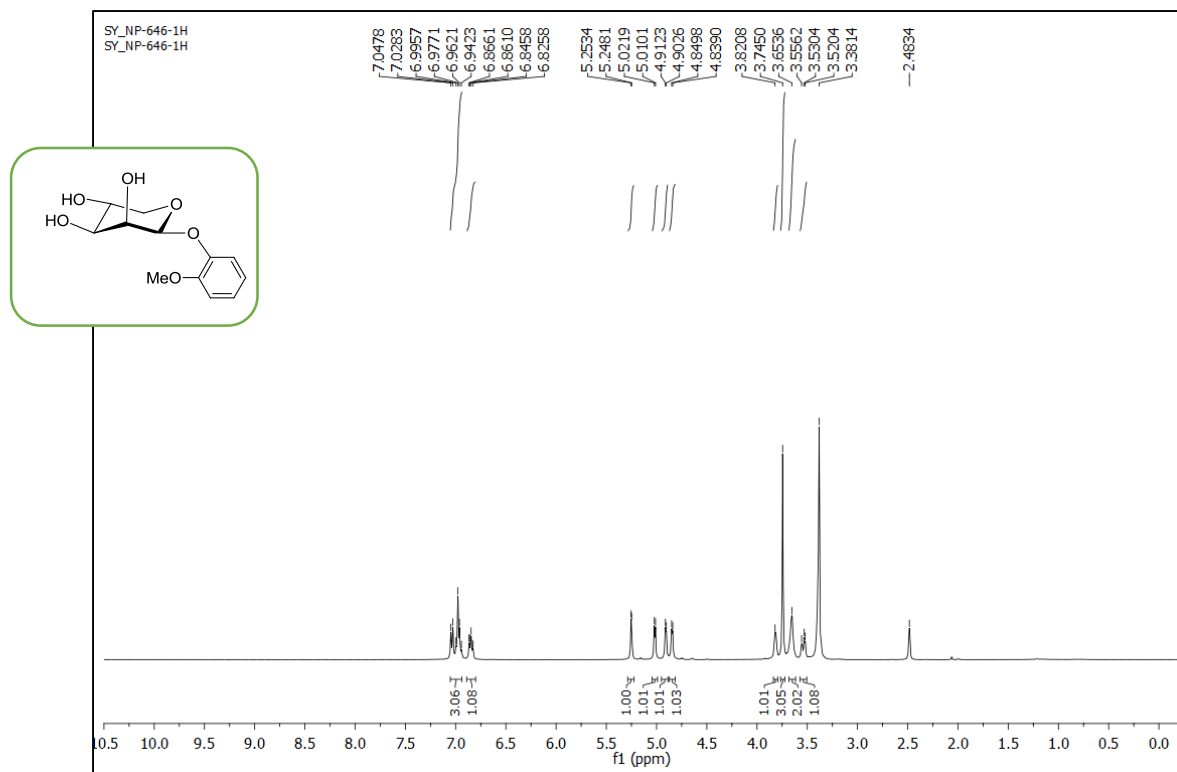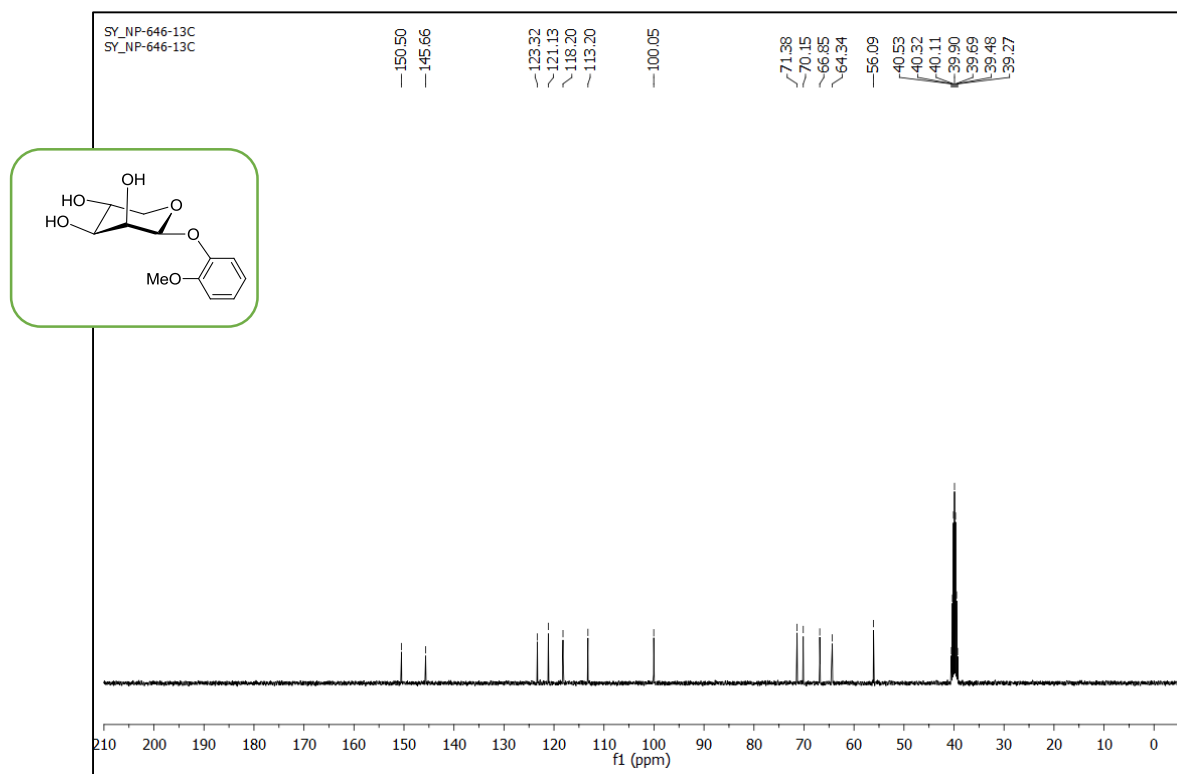



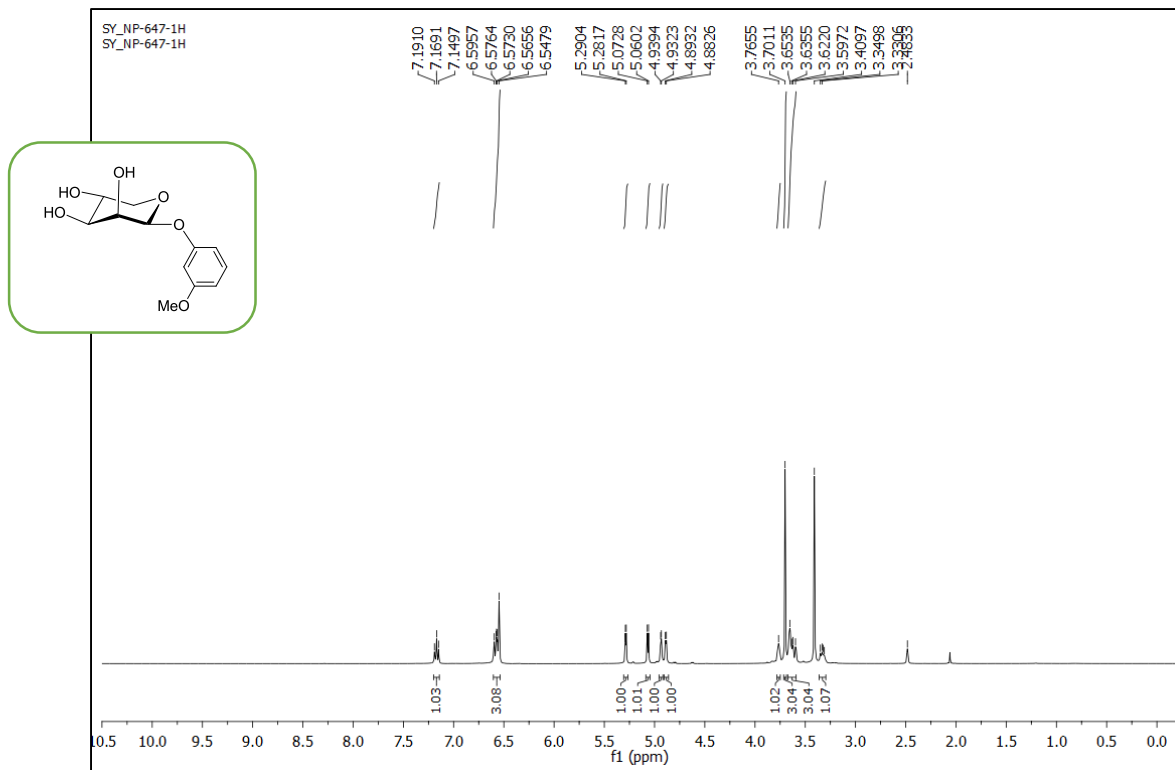

Figure S37.  $^1\text{H-NMR}$  (400 MHz,  $\text{DMSO-d}_6$ ) spectra of **4c**.

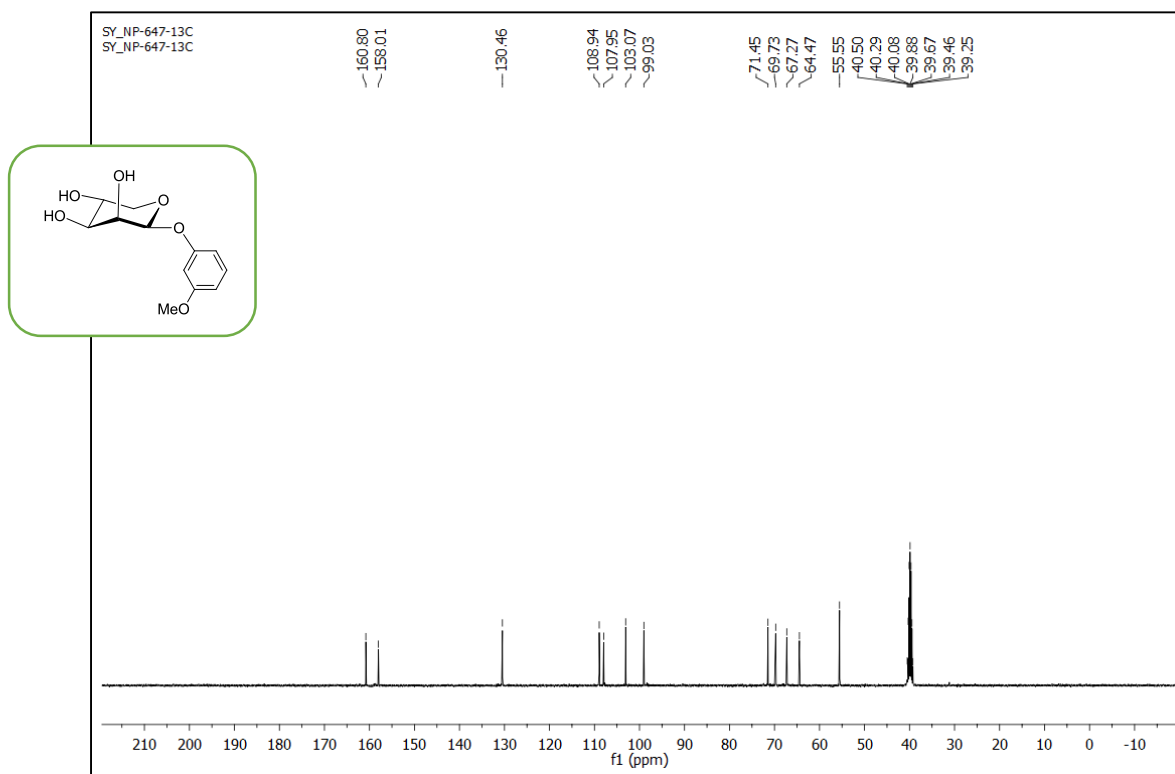

Figure S38.  $^{13}\text{C-NMR}$  (100 MHz,  $\text{DMSO-d}_6$ ) spectra of **4c**.

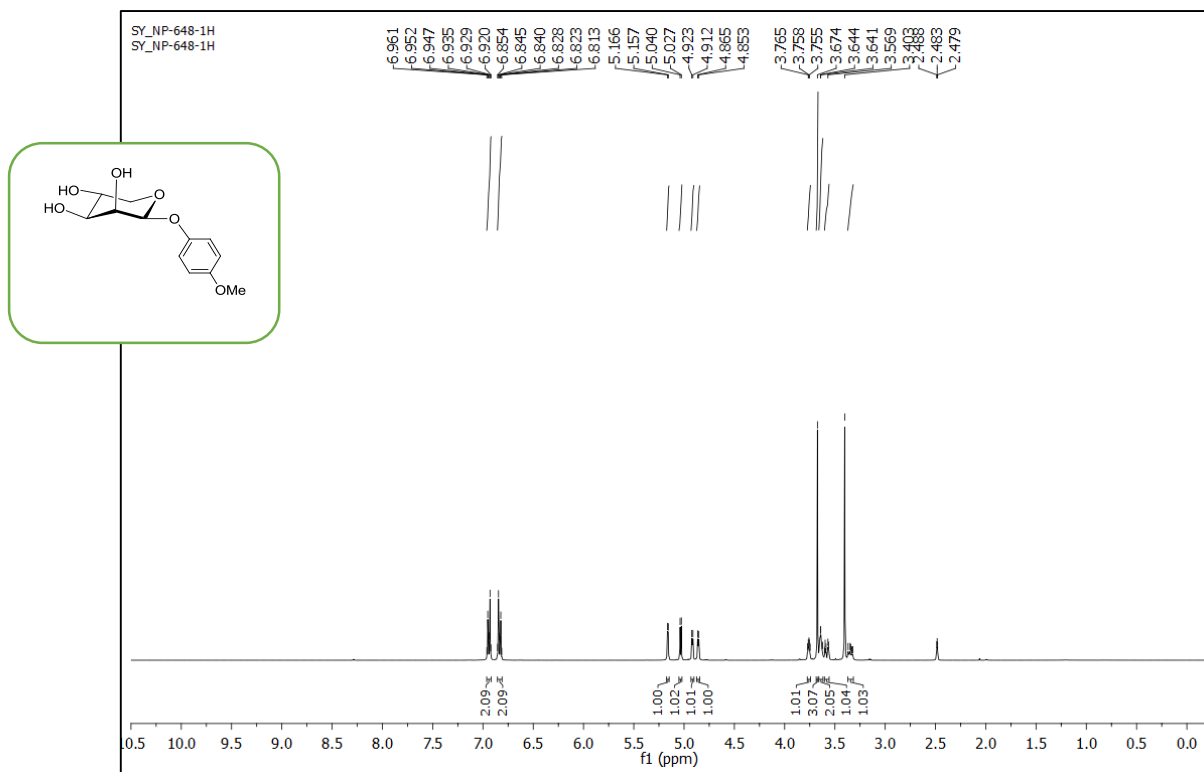

Figure S39. <sup>1</sup>H-NMR (400 MHz, DMSO-d<sub>6</sub>) spectra of 4d.

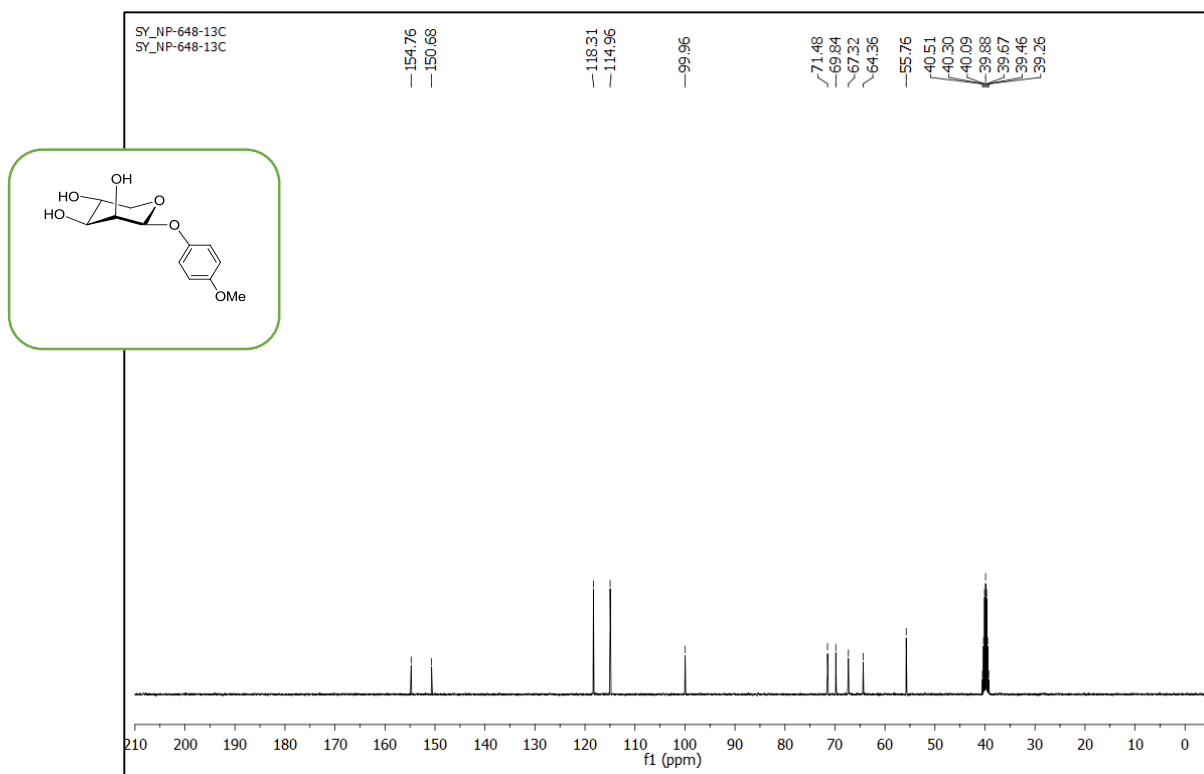

Figure S40. <sup>13</sup>C-NMR (100 MHz, DMSO-d<sub>6</sub>) spectra of 4d.

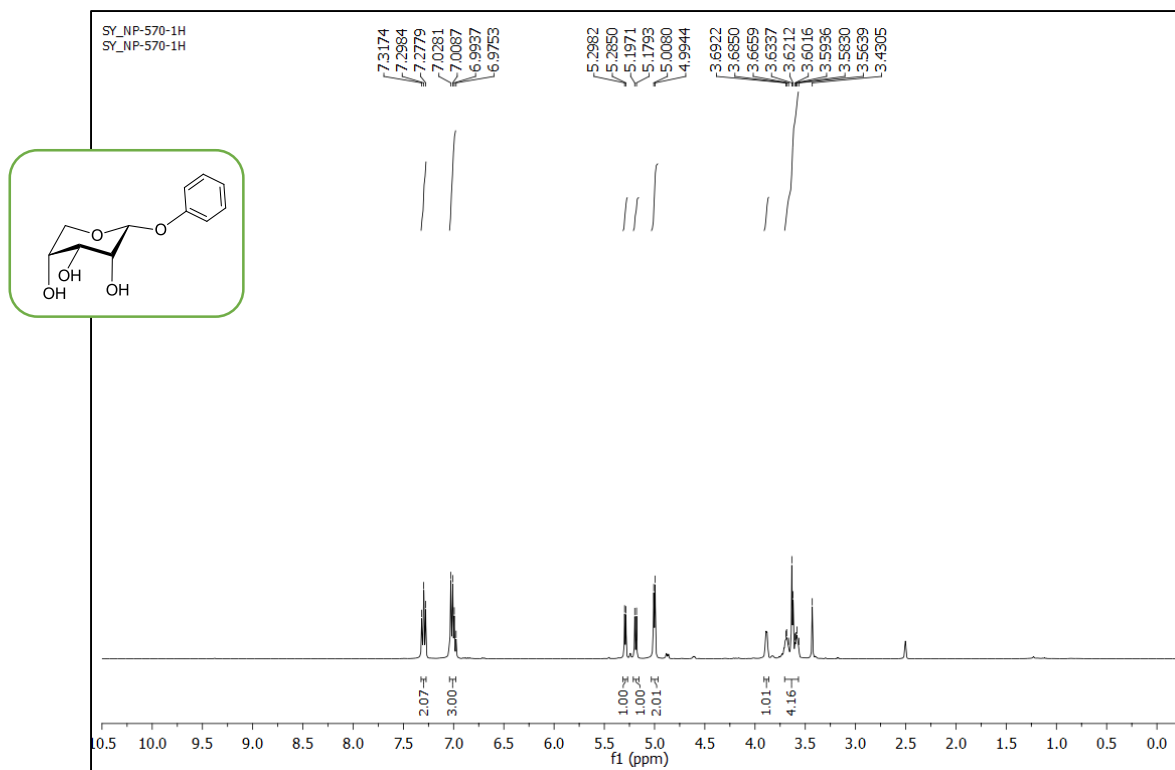

Figure S41.  $^1\text{H-NMR}$  (400 MHz, DMSO- $d_6$ ) spectra of **5a**.

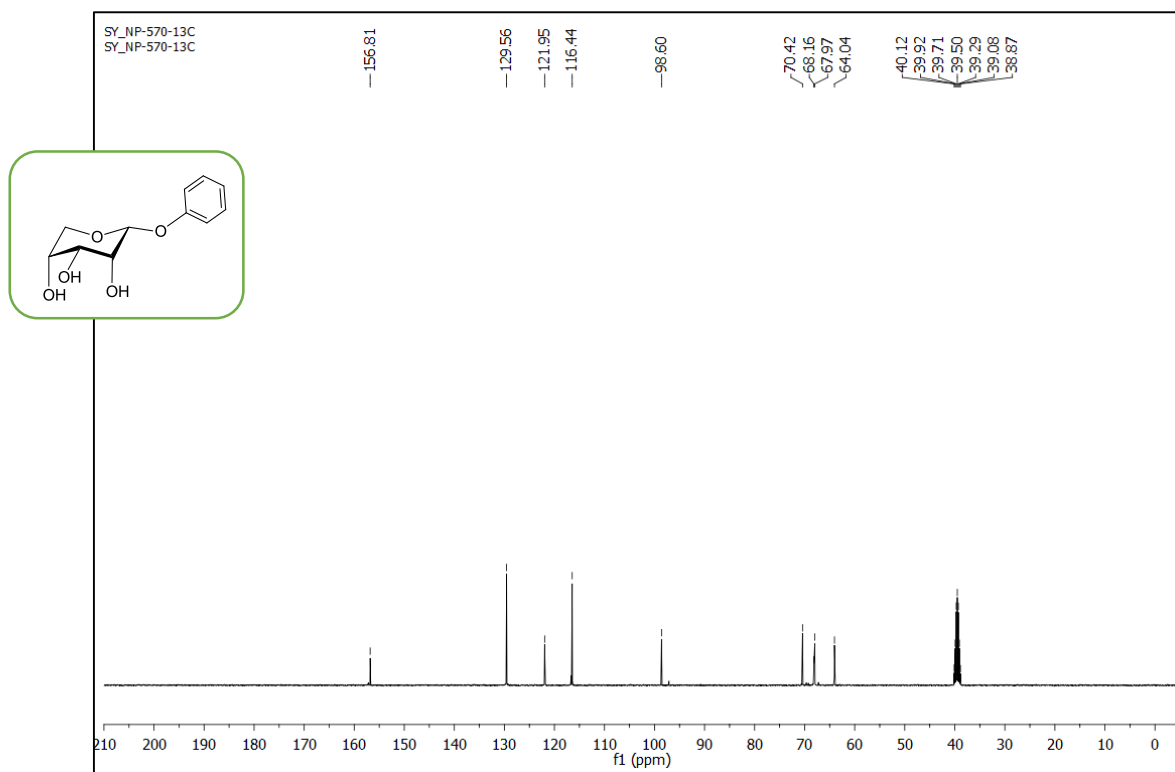

Figure S42.  $^{13}\text{C-NMR}$  (100 MHz, DMSO- $d_6$ ) spectra of **5a**.

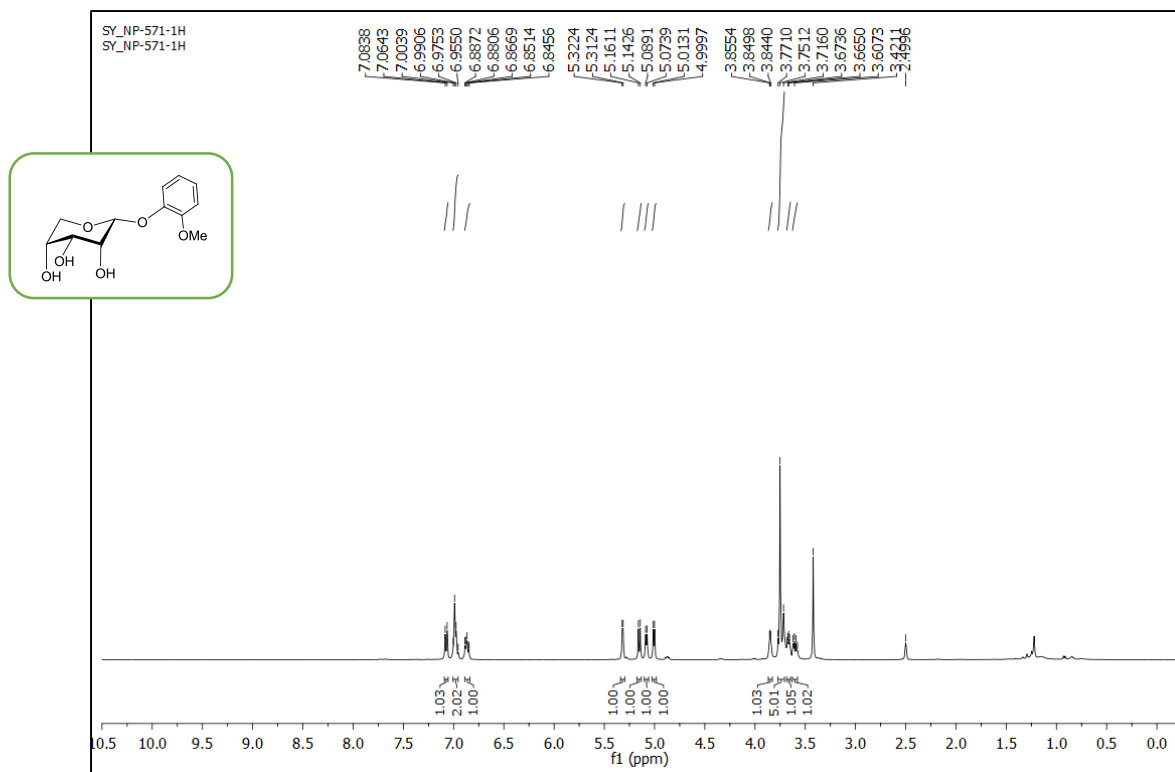

Figure S43.  $^1\text{H-NMR}$  (400 MHz, DMSO- $d_6$ ) spectra of **5b**.

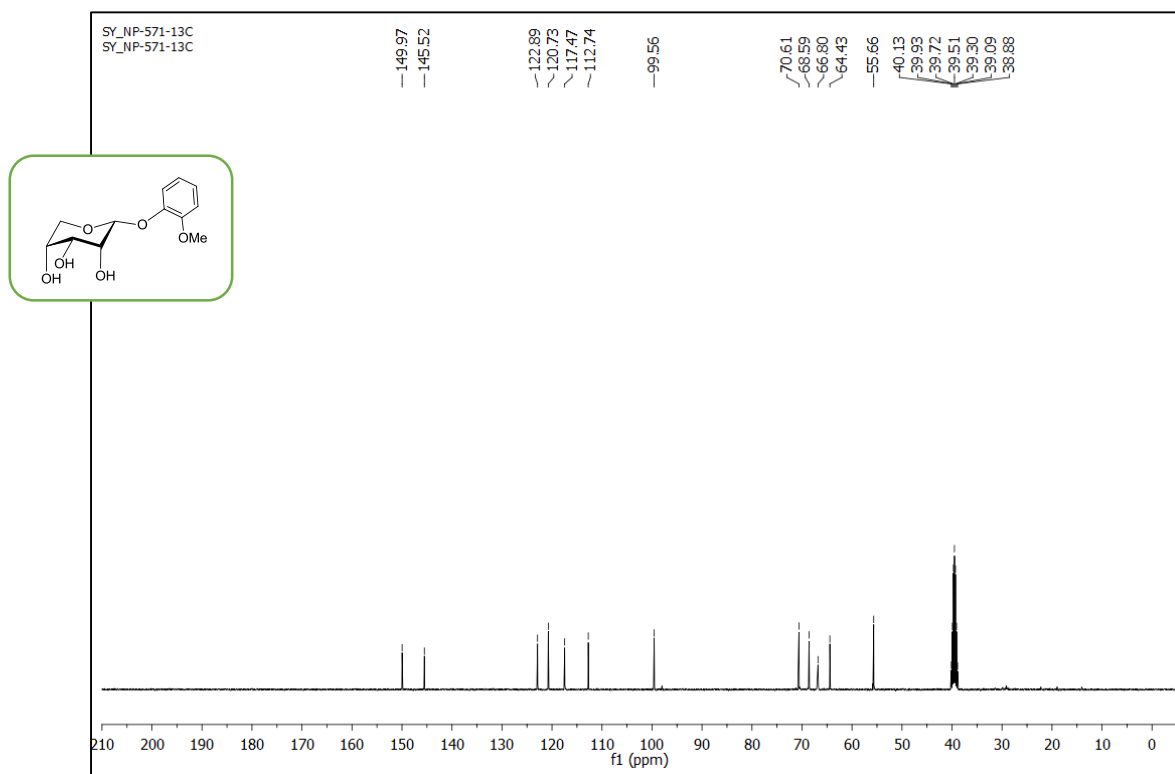

Figure S44.  $^{13}\text{C-NMR}$  (100 MHz, DMSO- $d_6$ ) spectra of **5b**.

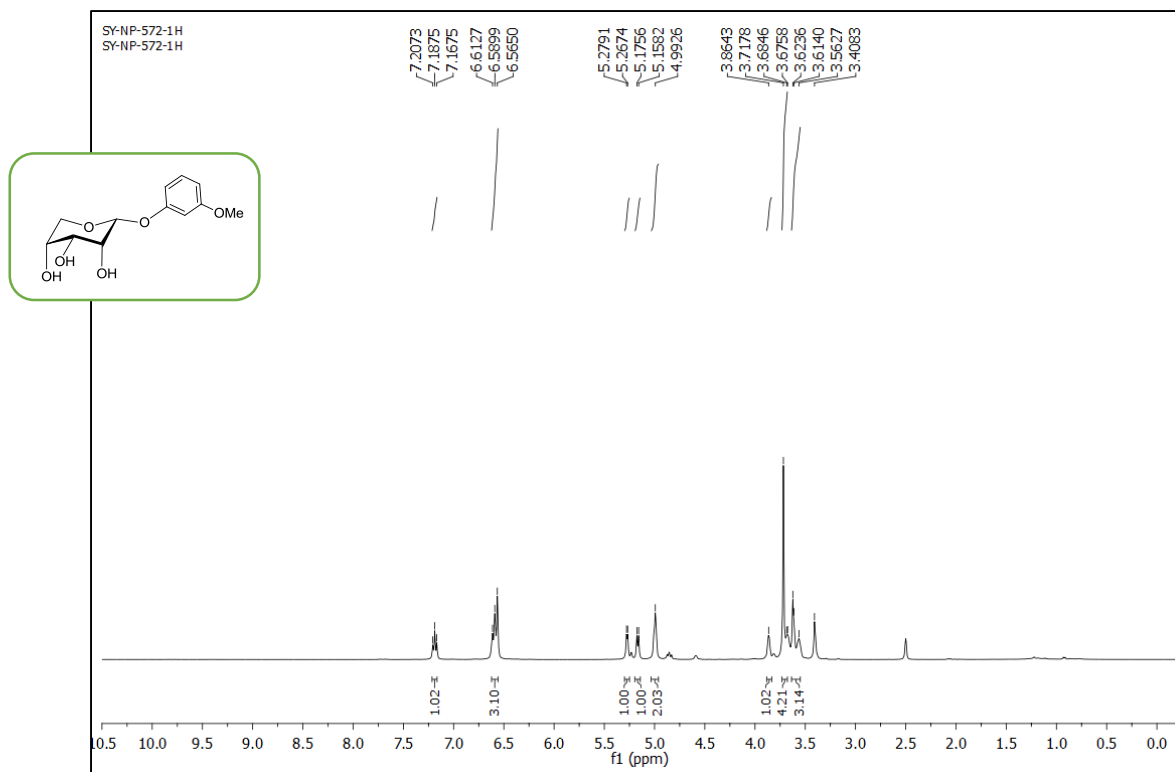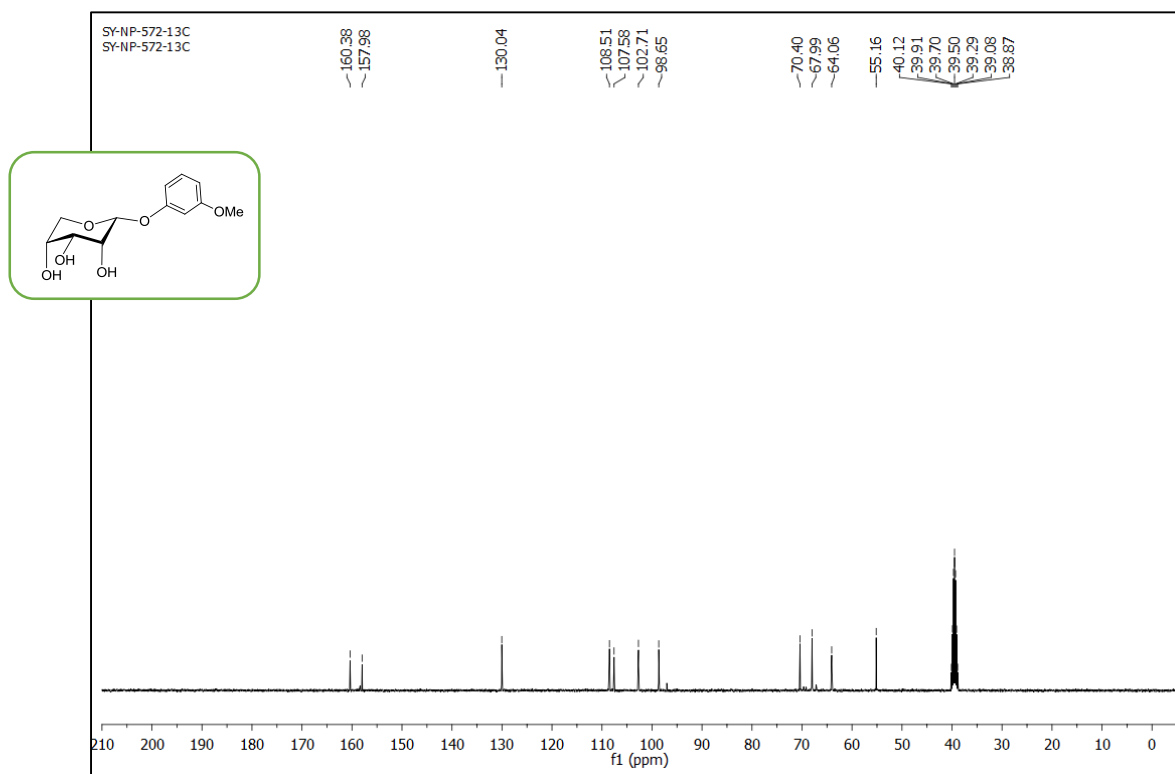

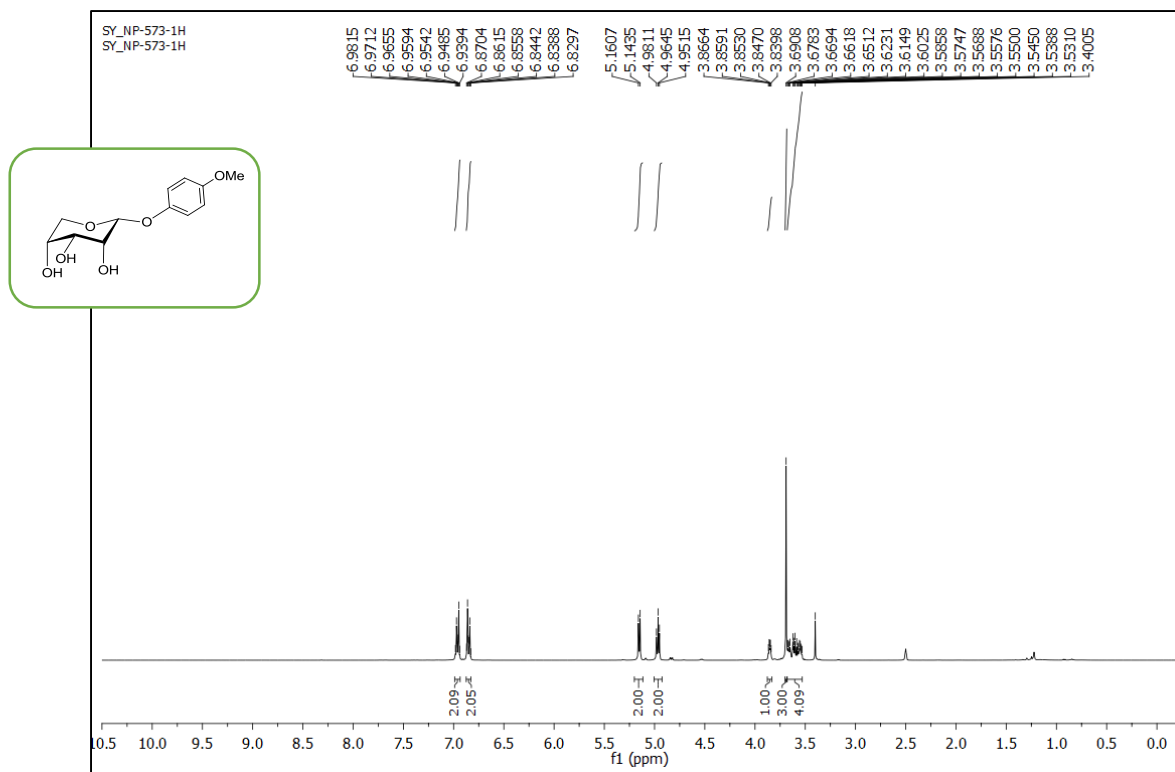

Figure S47.  $^1\text{H-NMR}$  (400 MHz,  $\text{DMSO-d}_6$ ) spectra of **5d**.

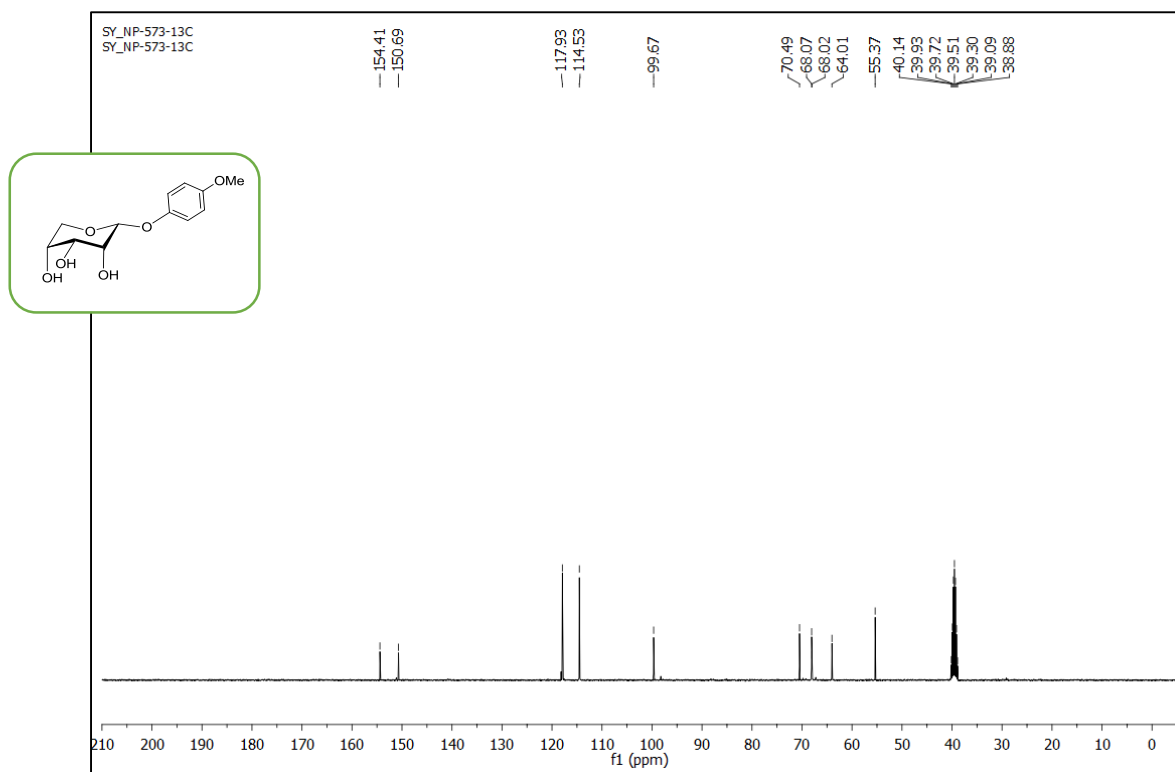

Figure S48.  $^{13}\text{C-NMR}$  (100 MHz,  $\text{DMSO-d}_6$ ) spectra of **5d**.

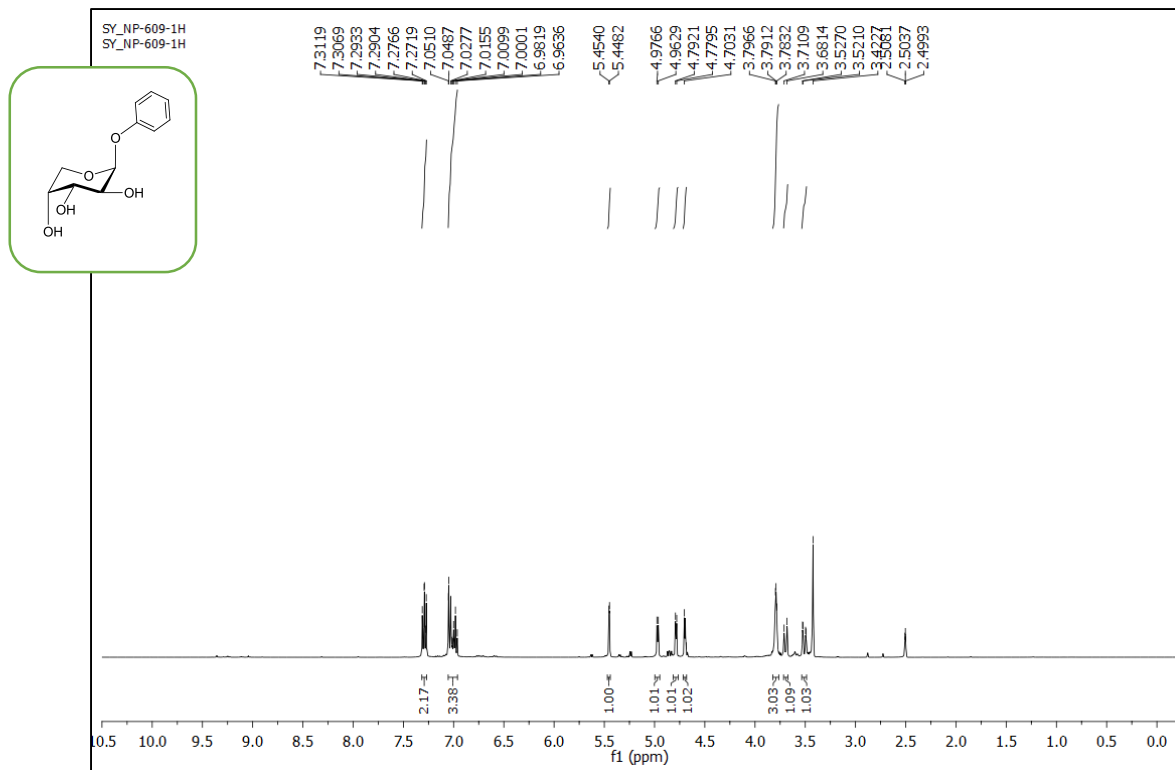

Figure S49.  $^1\text{H-NMR}$  (400 MHz,  $\text{DMSO-d}_6$ ) spectra of **2'a**.

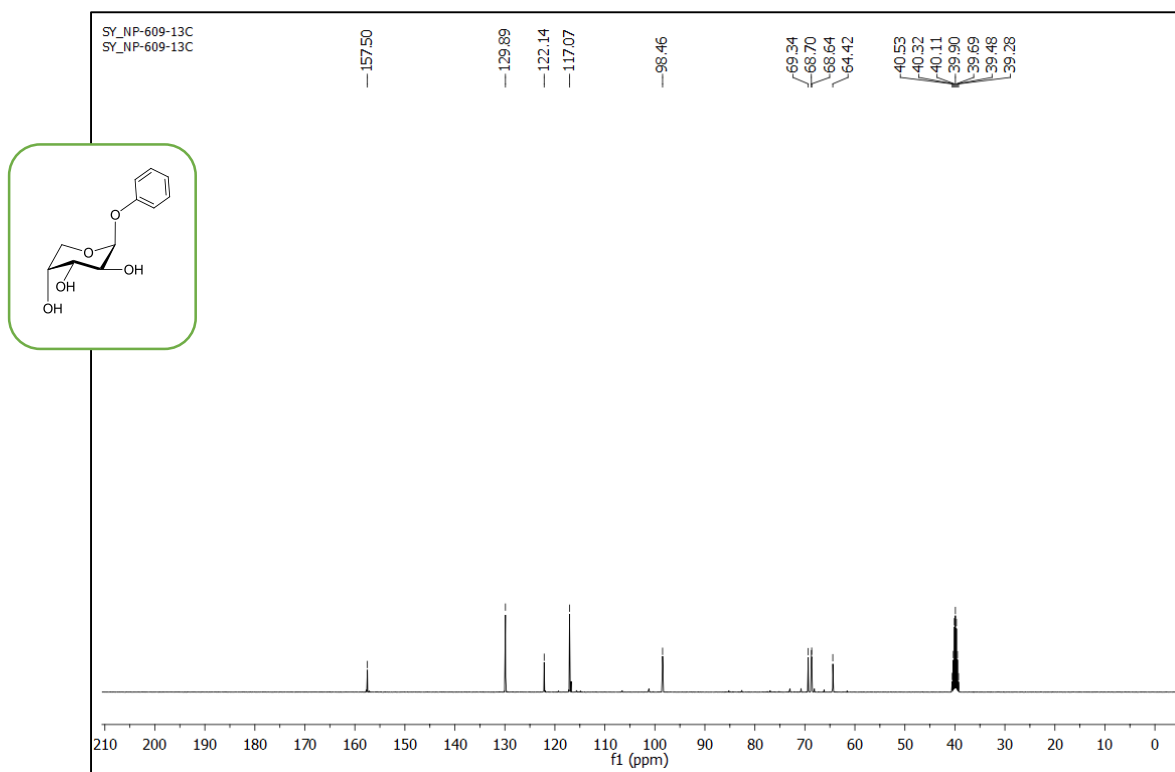

Figure S50.  $^{13}\text{C-NMR}$  (100 MHz,  $\text{DMSO-d}_6$ ) spectra of **2'a**.

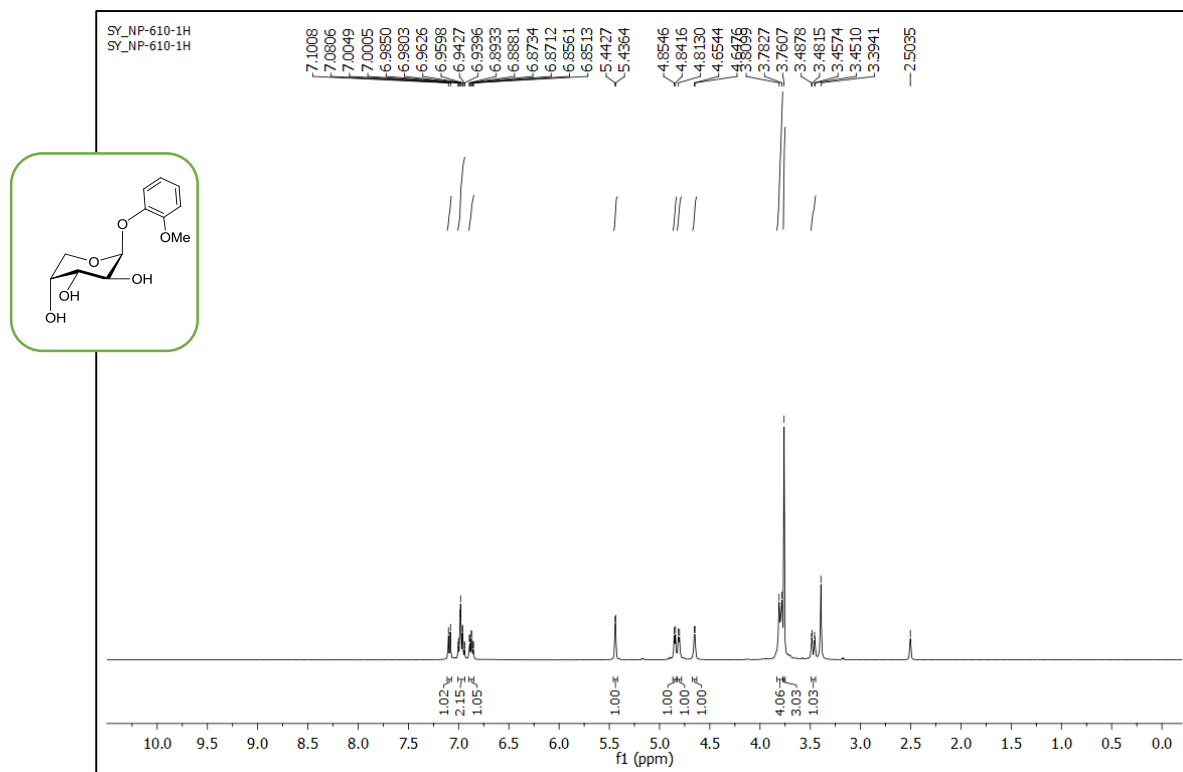

Figure S51. <sup>1</sup>H-NMR (400 MHz, DMSO-d<sub>6</sub>) spectra of **2'b**.

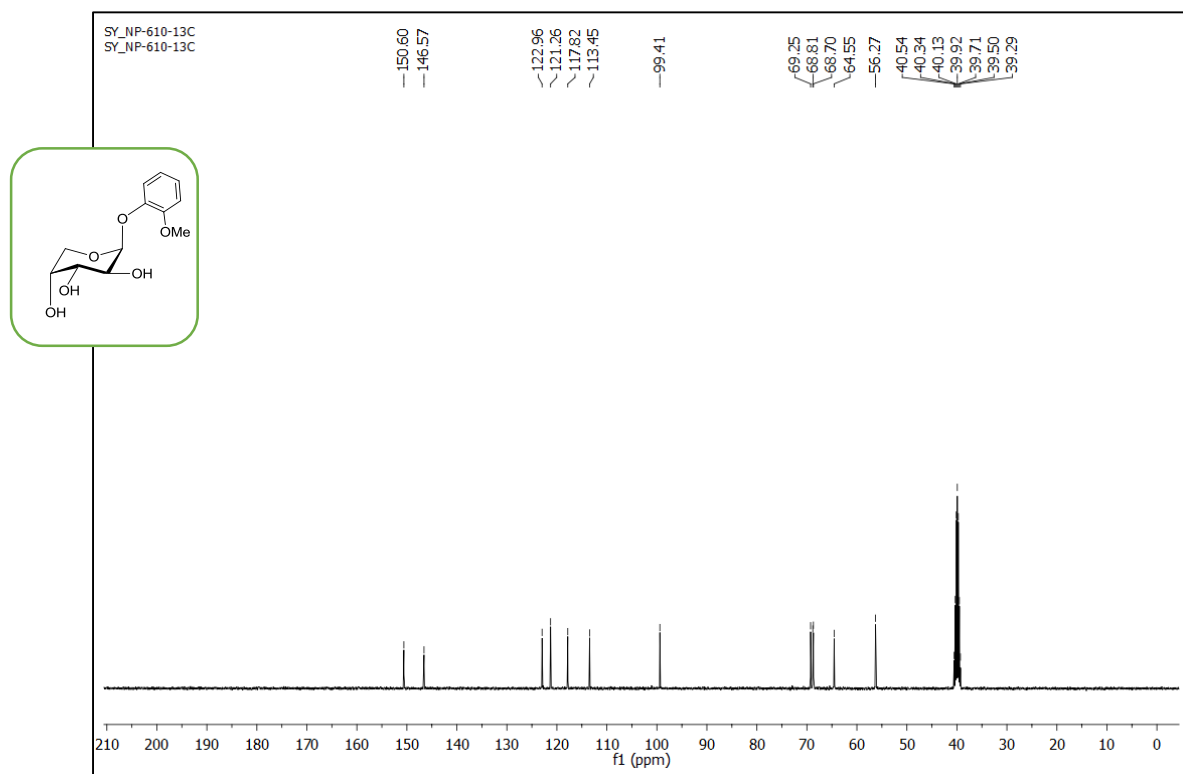

Figure S52. <sup>13</sup>C-NMR (100 MHz, DMSO-d<sub>6</sub>) spectra of **2'b**.



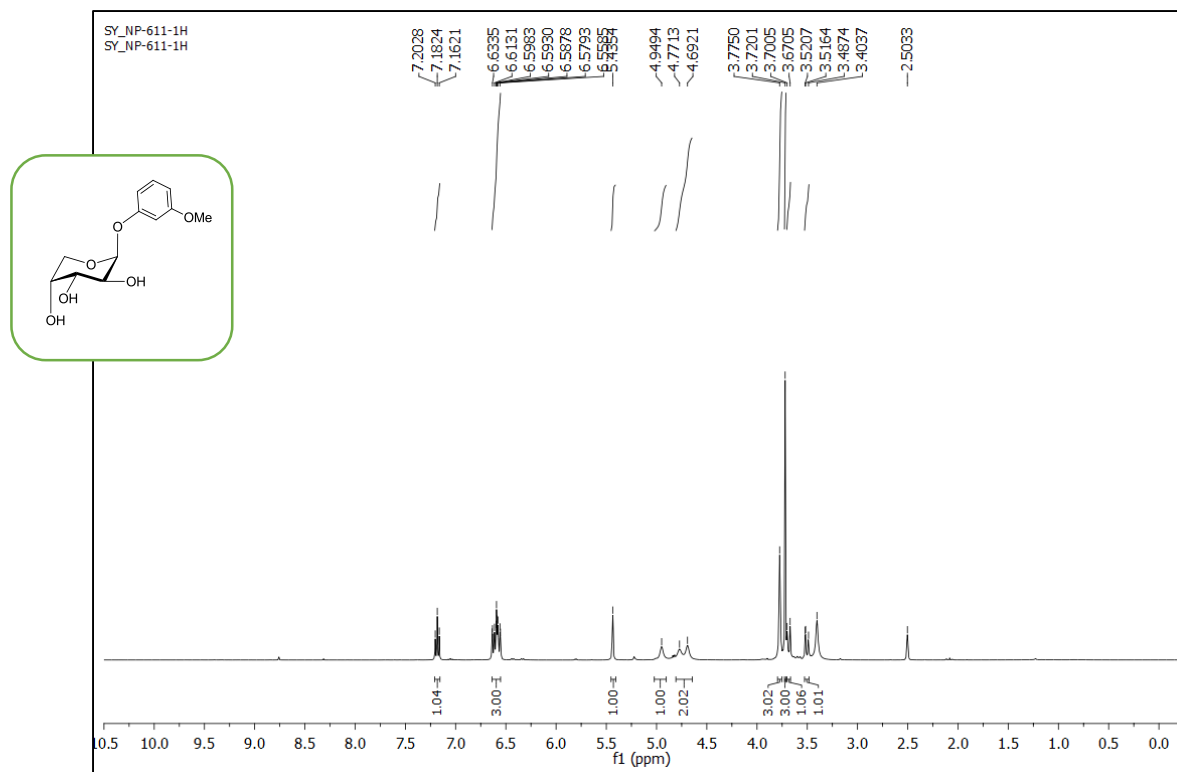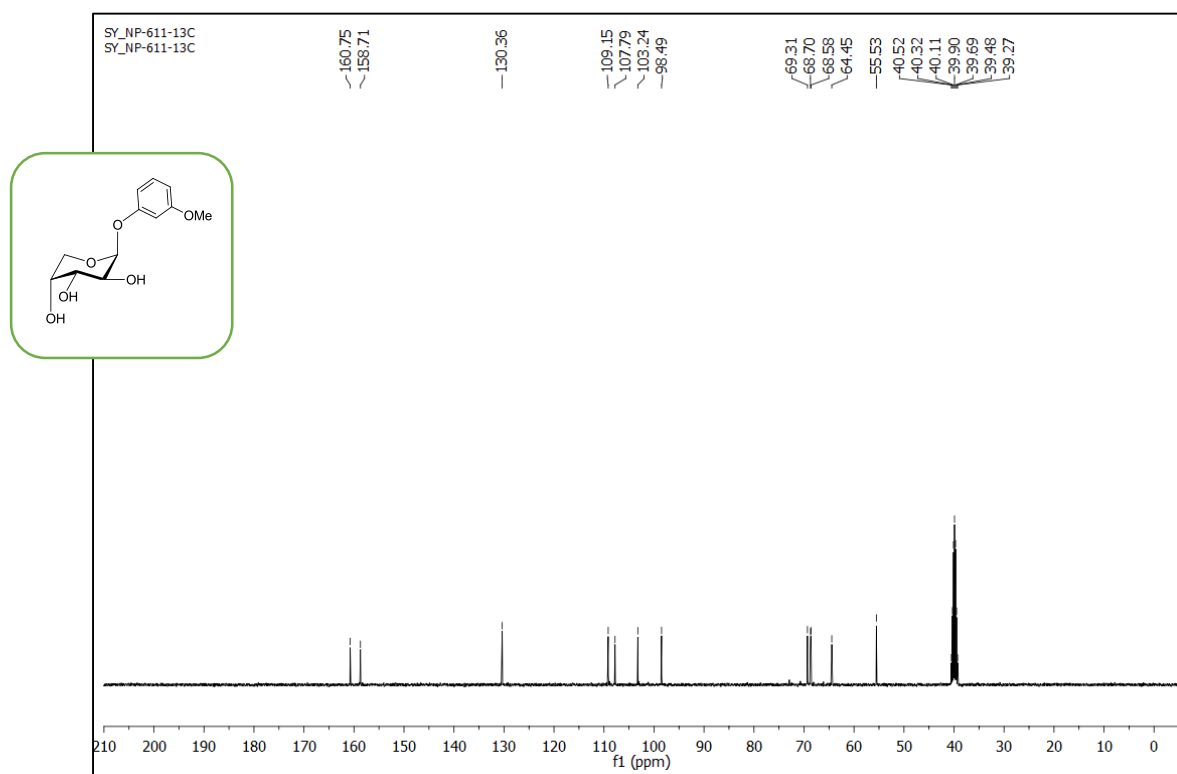

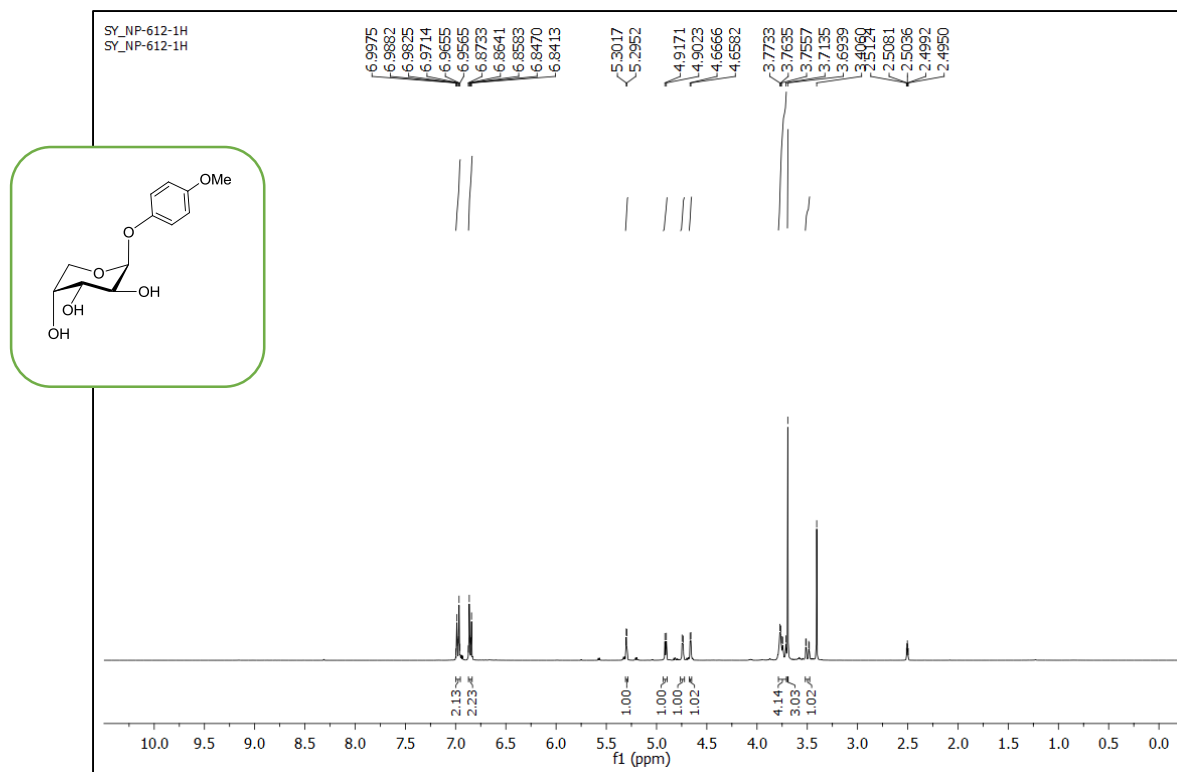

Figure S55.  $^1\text{H-NMR}$  (400 MHz, DMSO- $d_6$ ) spectra of **2'd**.

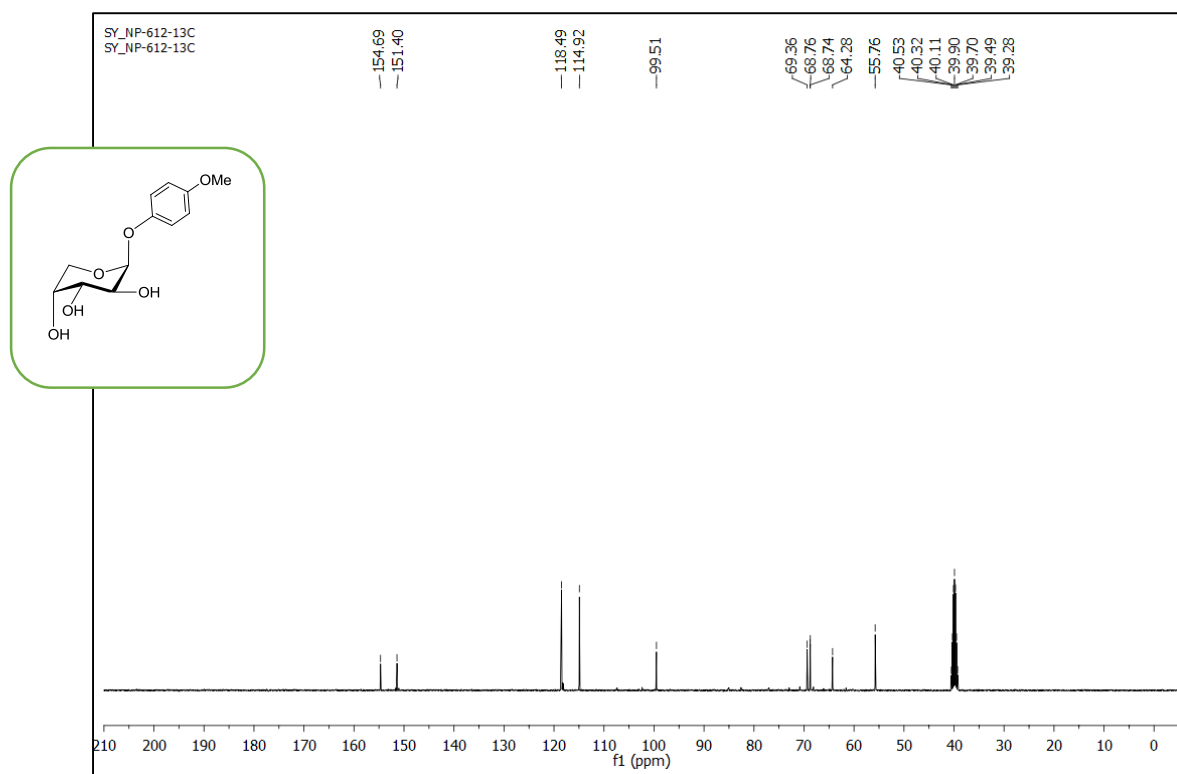

Figure S56.  $^{13}\text{C-NMR}$  (100 MHz, DMSO- $d_6$ ) spectra of **2'd**.

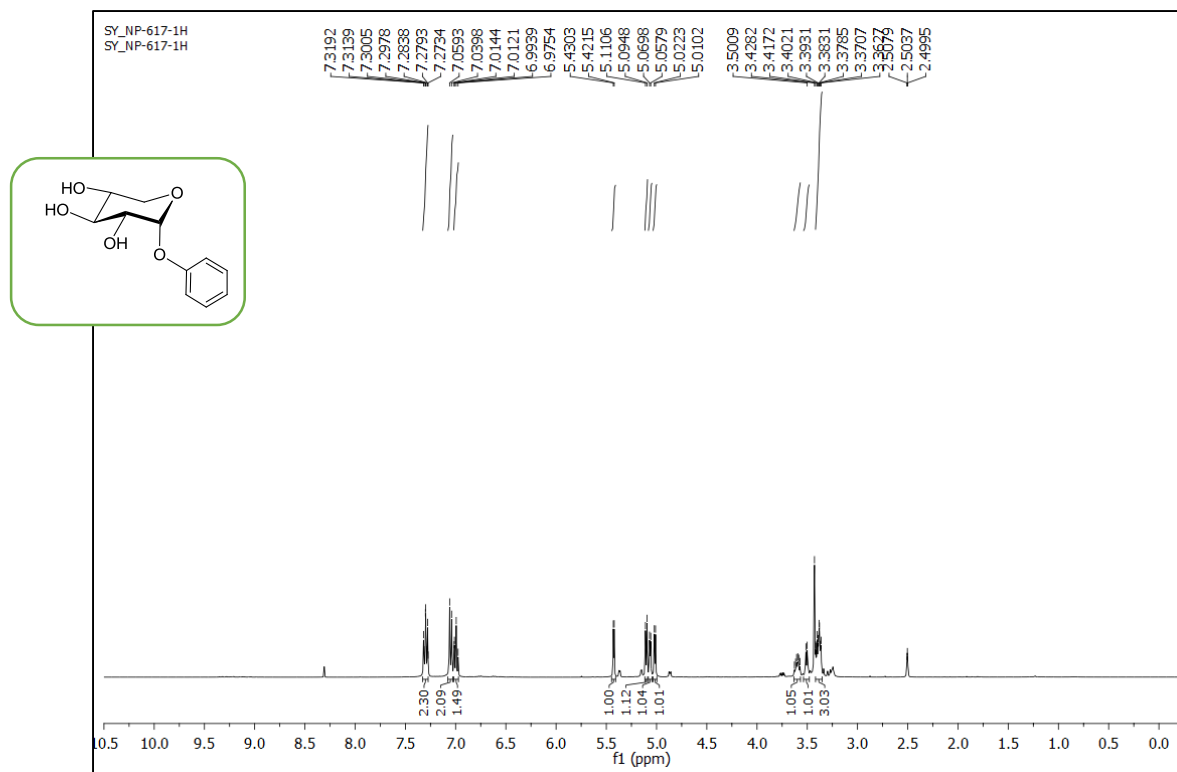

Figure S57.  $^1\text{H-NMR}$  (400 MHz,  $\text{DMSO-d}_6$ ) spectra of **3'a**.

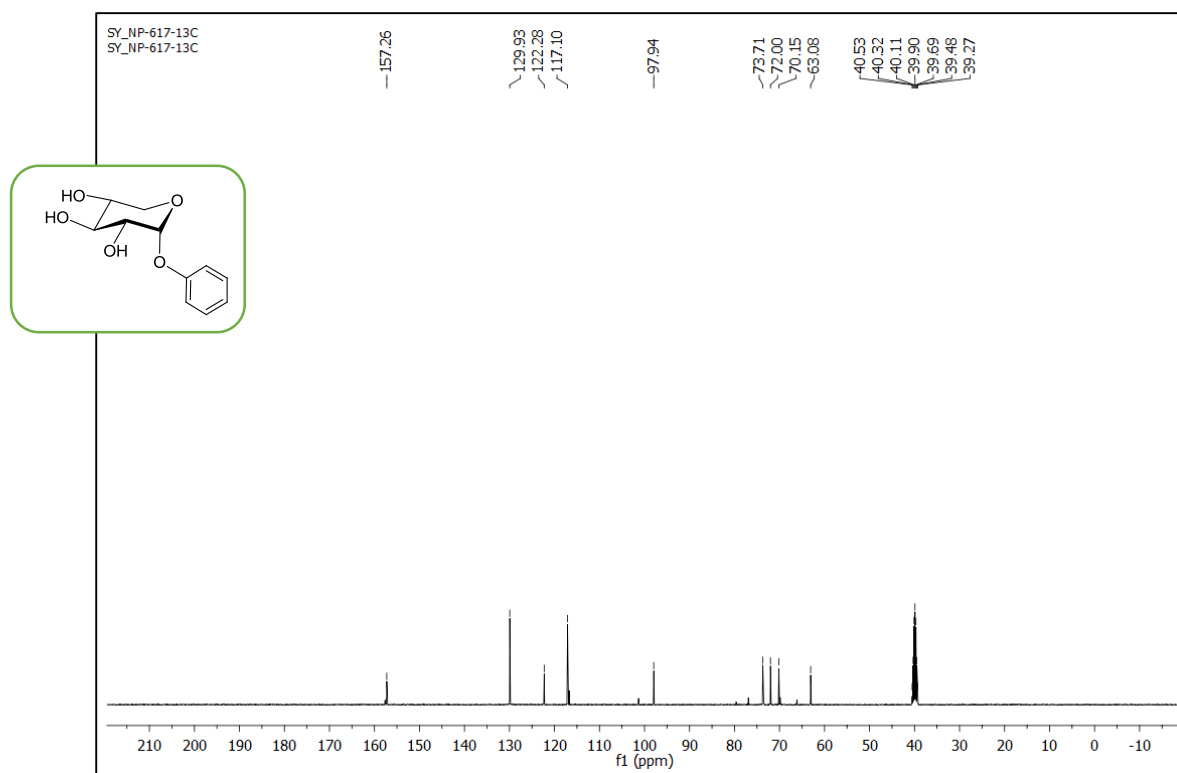

Figure S58.  $^{13}\text{C-NMR}$  (100 MHz,  $\text{DMSO-d}_6$ ) spectra of **3'a**.

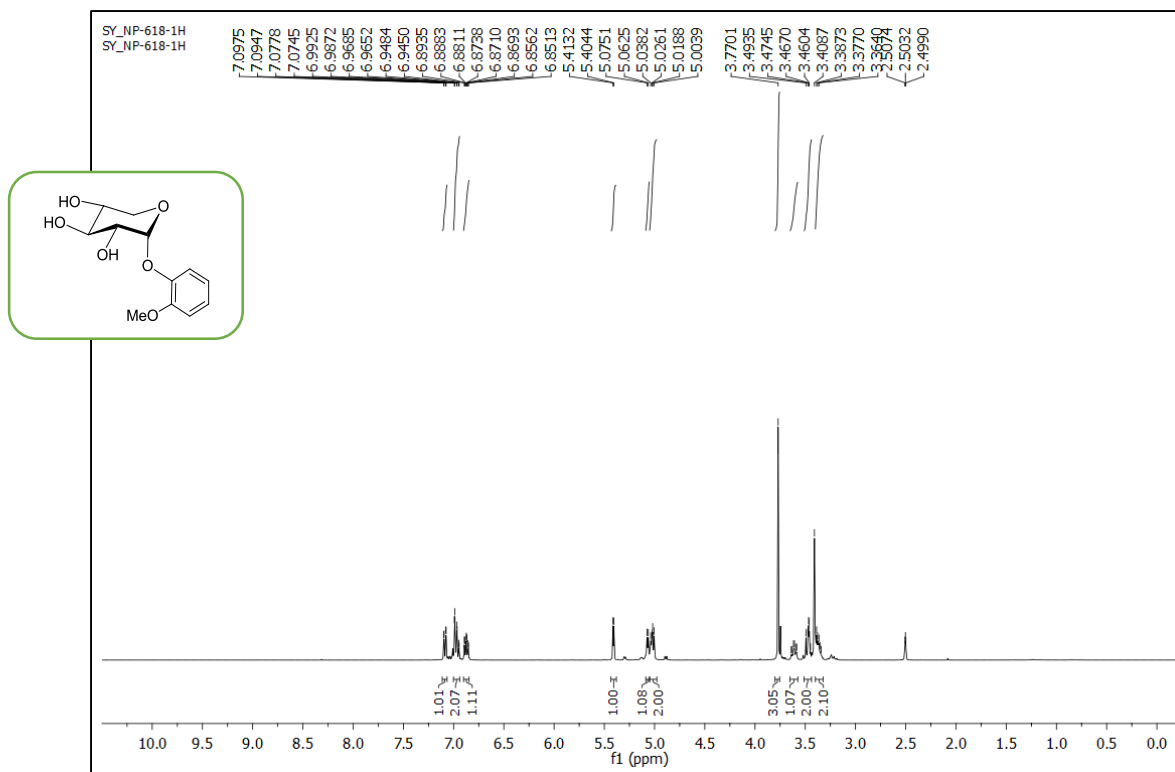

Figure S59.  $^1\text{H-NMR}$  (400 MHz,  $\text{DMSO-d}_6$ ) spectra of **3'b**.

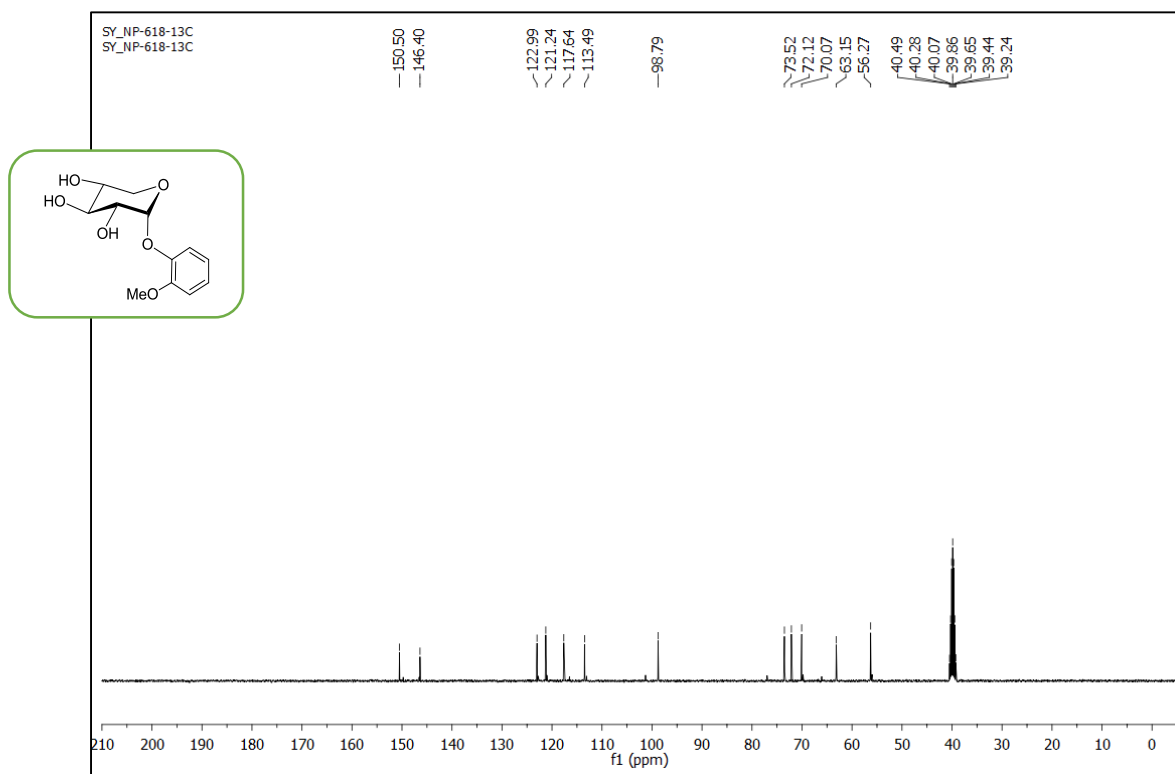

Figure S60.  $^{13}\text{C-NMR}$  (100 MHz,  $\text{DMSO-d}_6$ ) spectra of **3'b**.

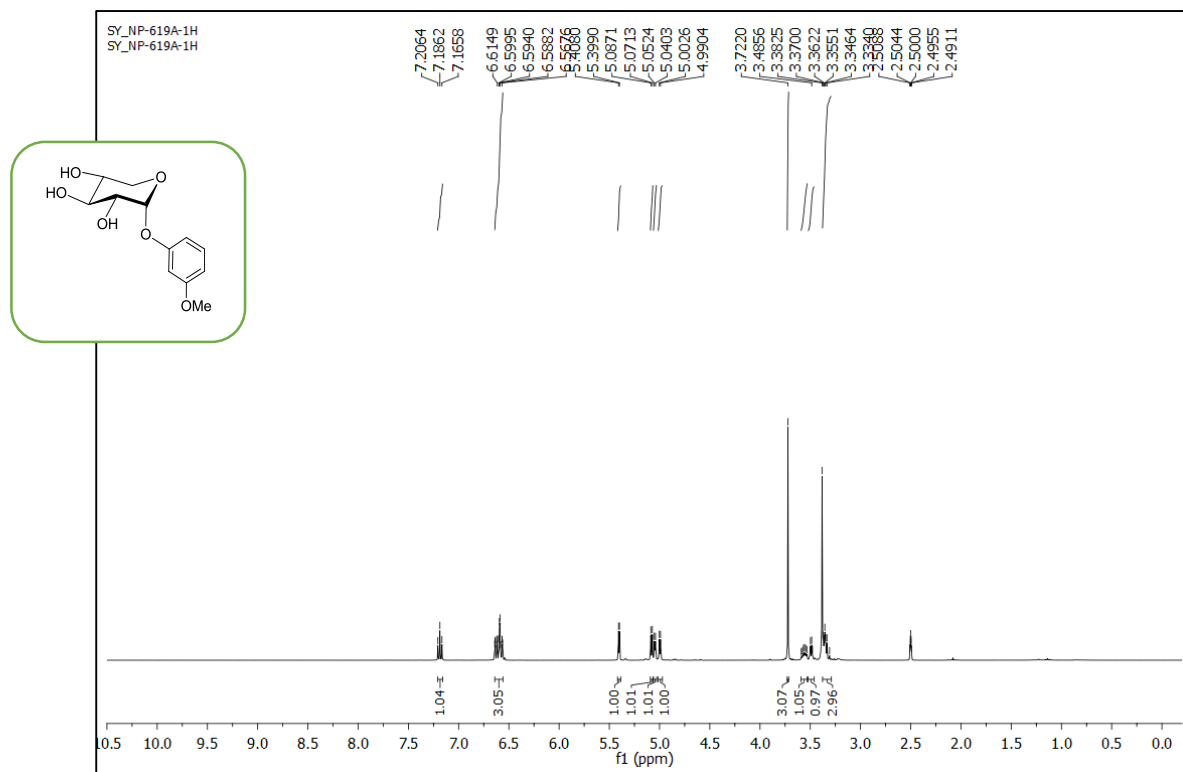

Figure S61. <sup>1</sup>H-NMR (400 MHz, DMSO-d<sub>6</sub>) spectra of 3'c.

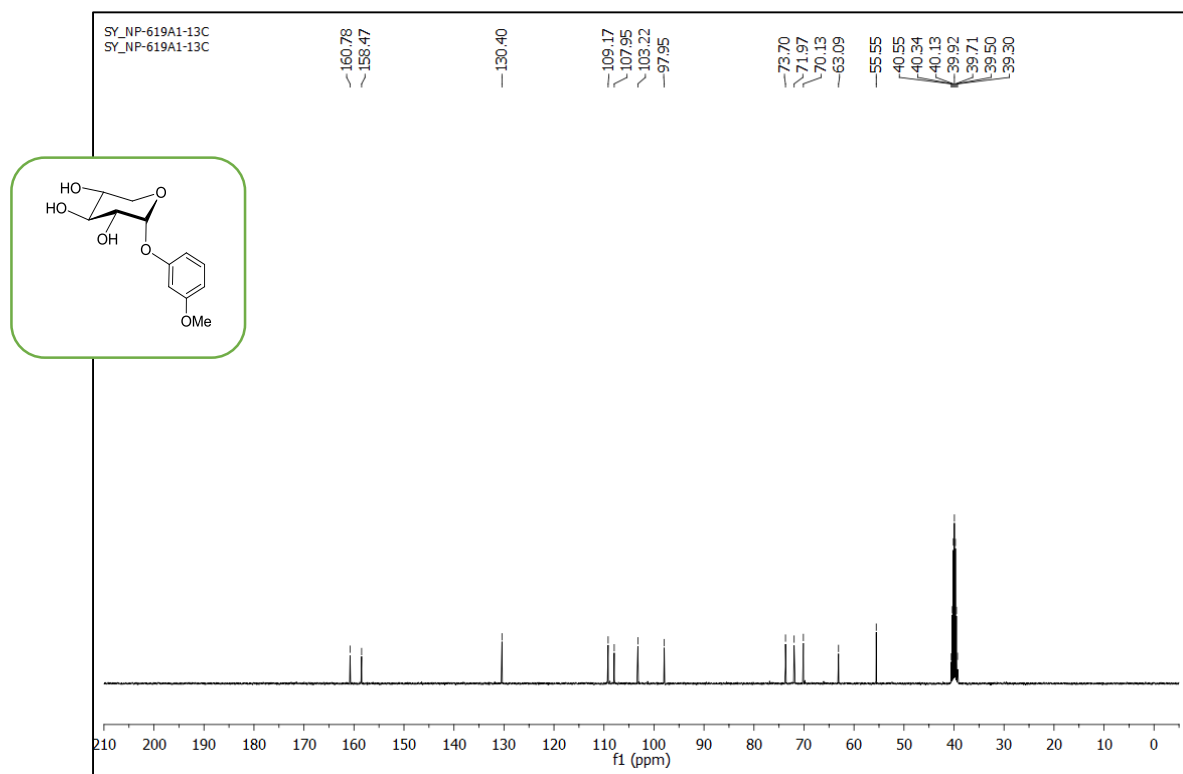

Figure S62. <sup>13</sup>C-NMR (100 MHz, DMSO-d<sub>6</sub>) spectra of 3'c.

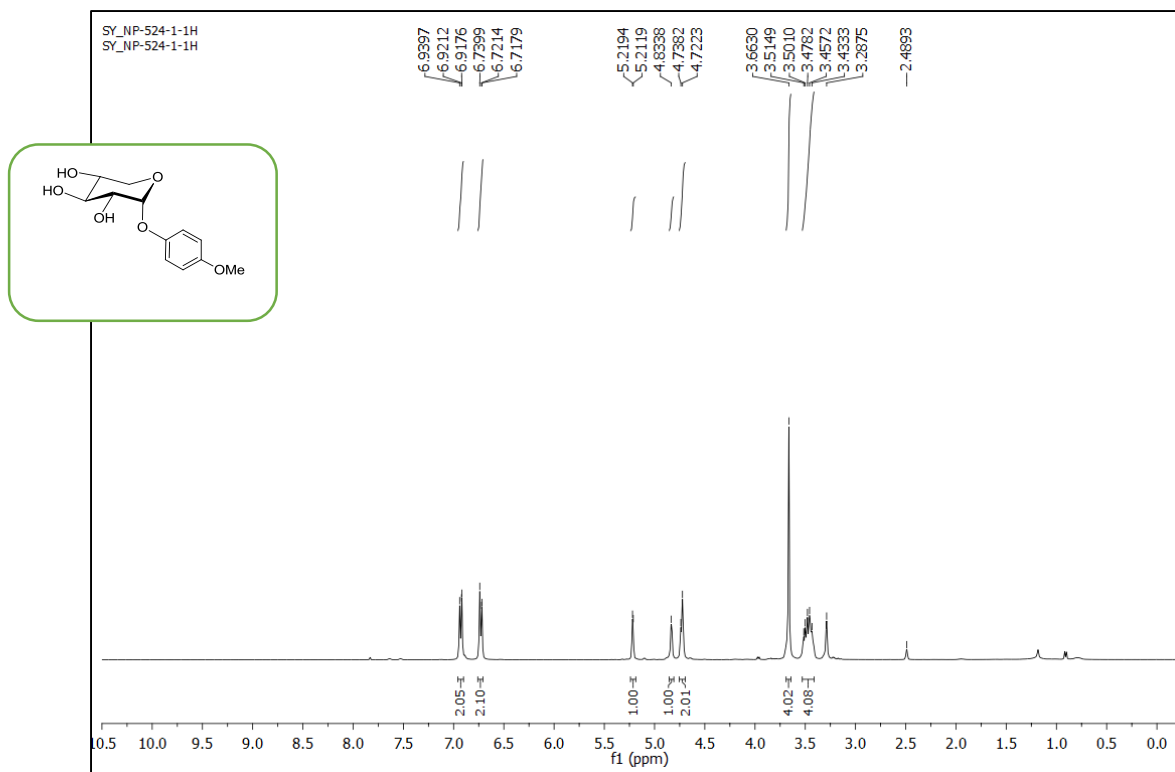

Figure S63.  $^1\text{H-NMR}$  (400 MHz, DMSO- $d_6$ ) spectra of **3'd**.

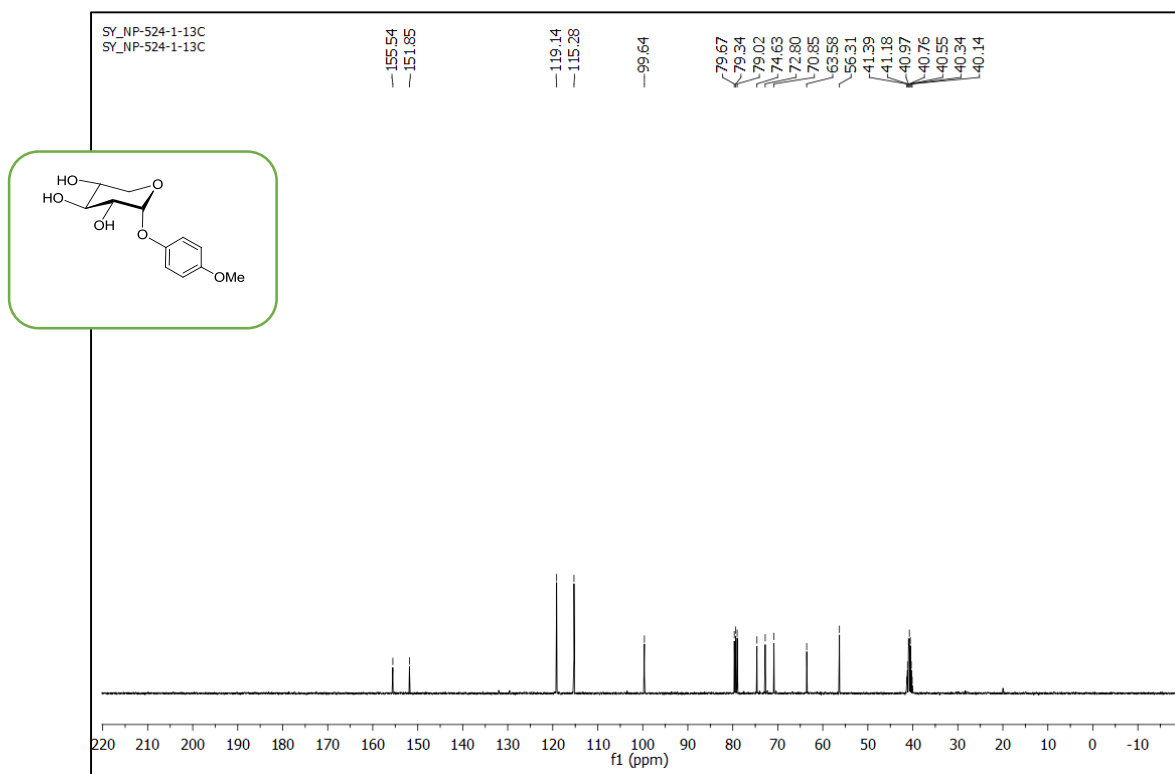

Figure S64.  $^{13}\text{C-NMR}$  (100 MHz, DMSO- $d_6$ ) spectra of **3'd**.

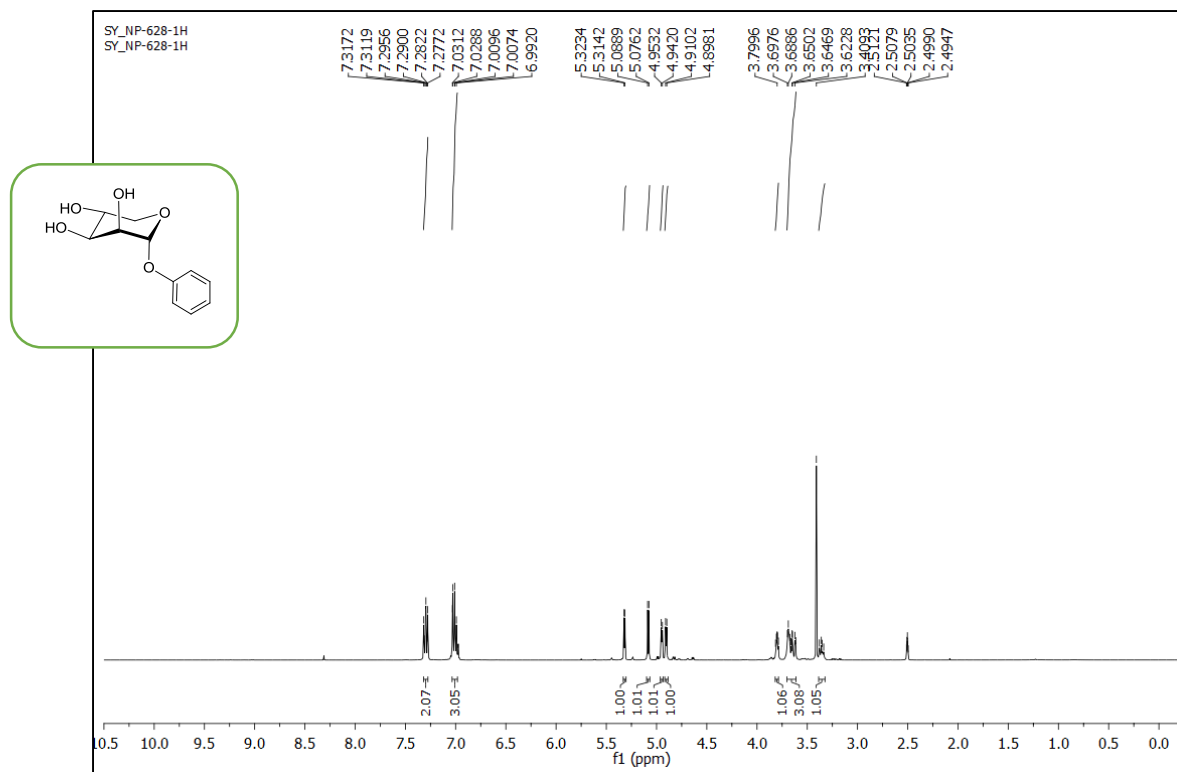

Figure S65. <sup>1</sup>H-NMR (400 MHz, DMSO-d<sub>6</sub>) spectra of 4'a.

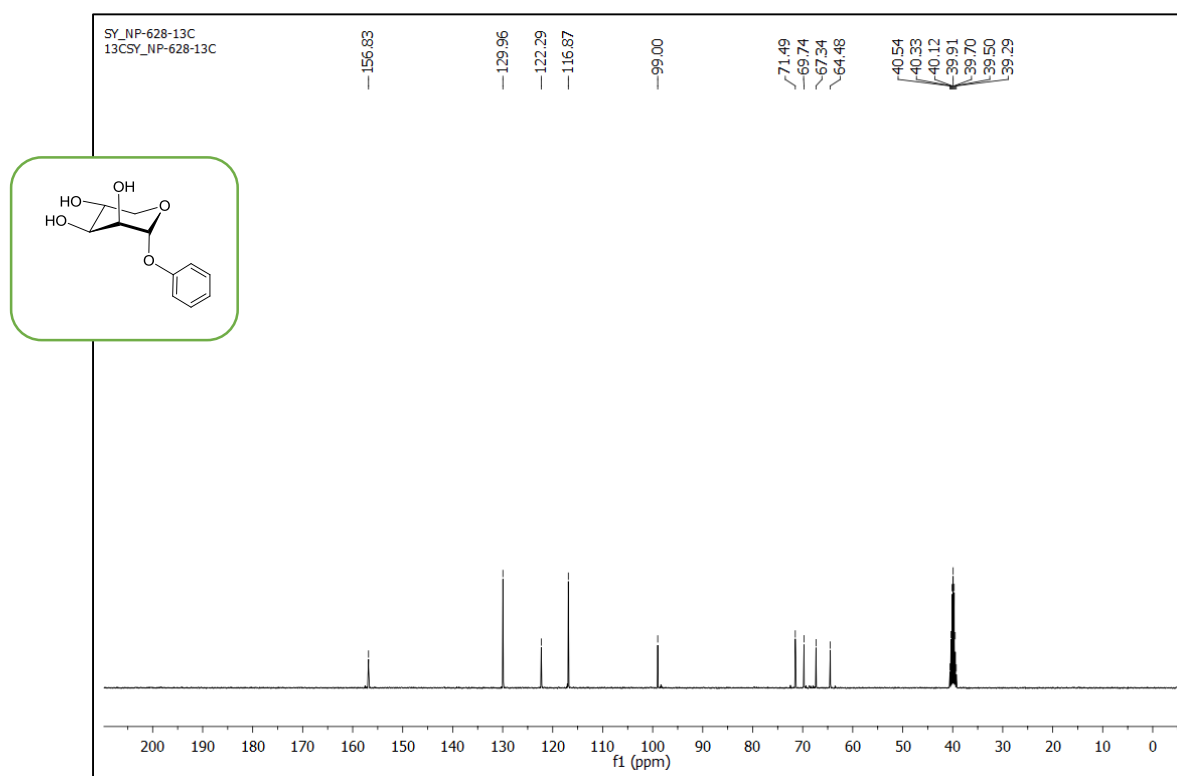

Figure S66. <sup>13</sup>C-NMR (100 MHz, DMSO-d<sub>6</sub>) spectra of 4'a.

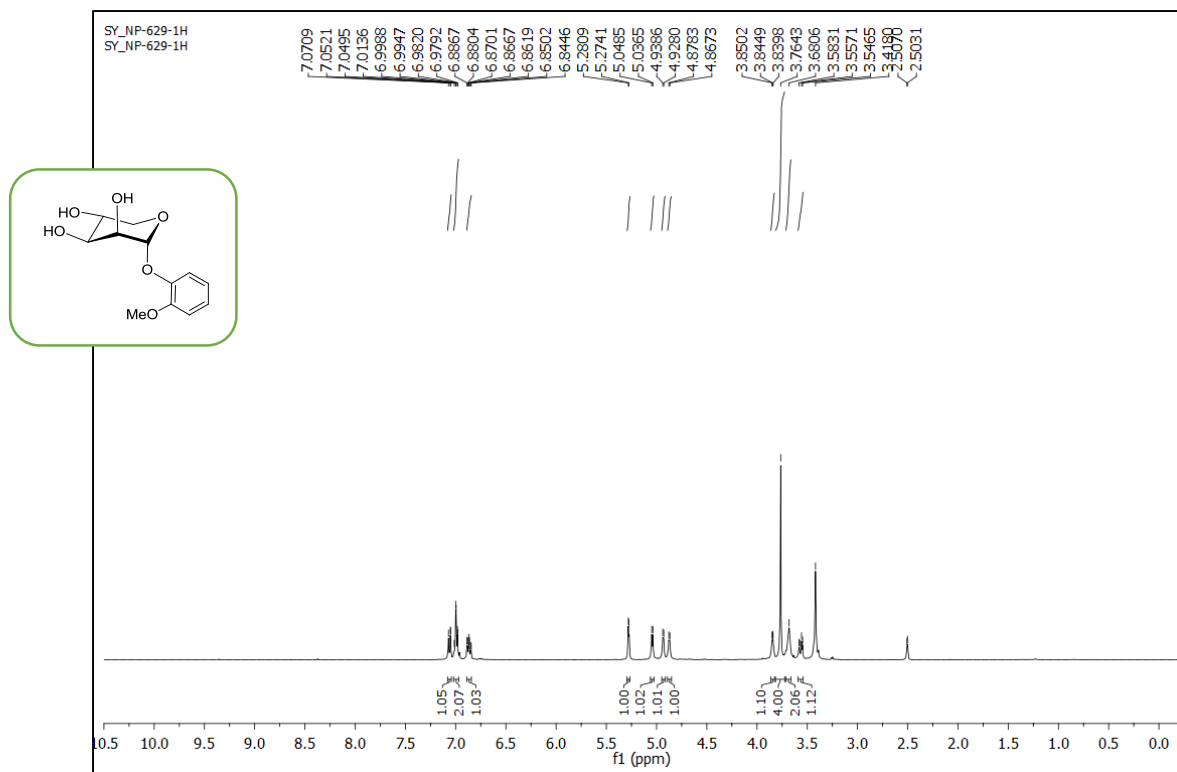

Figure S67.  $^1\text{H-NMR}$  (400 MHz,  $\text{DMSO-d}_6$ ) spectra of **4'b**.

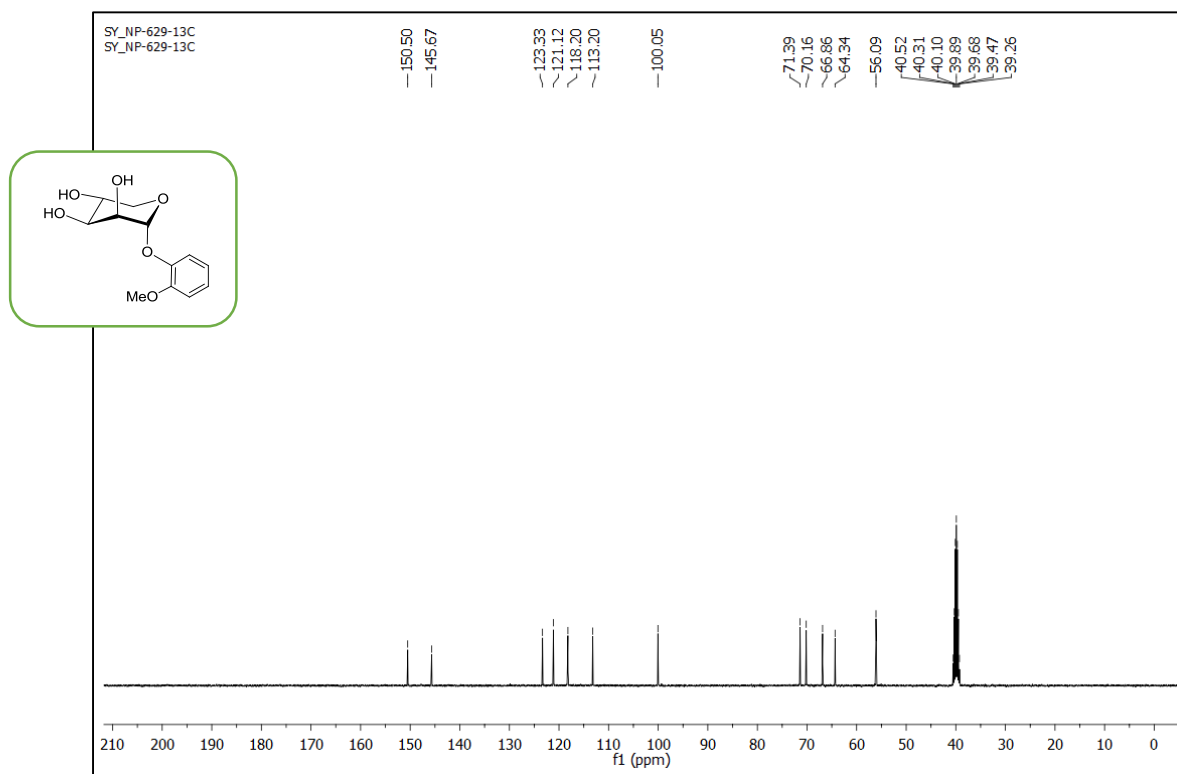

Figure S68.  $^{13}\text{C-NMR}$  (100 MHz,  $\text{DMSO-d}_6$ ) spectra of **4'b**.



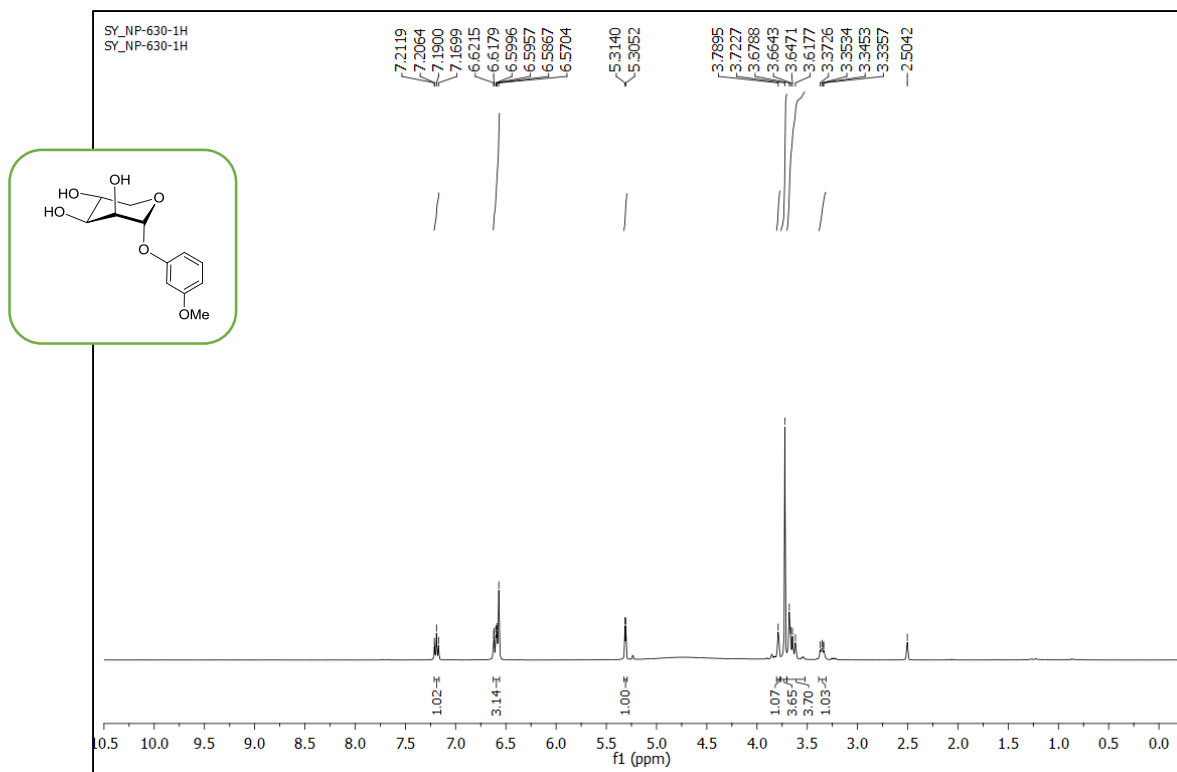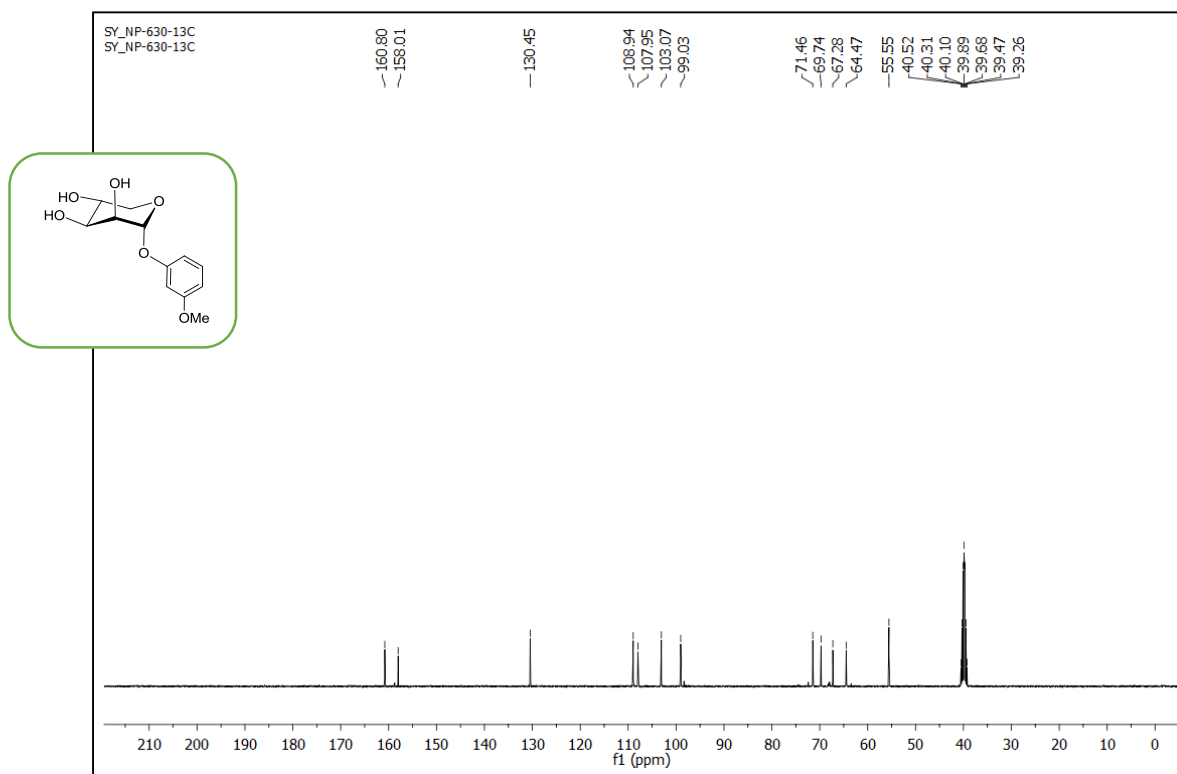

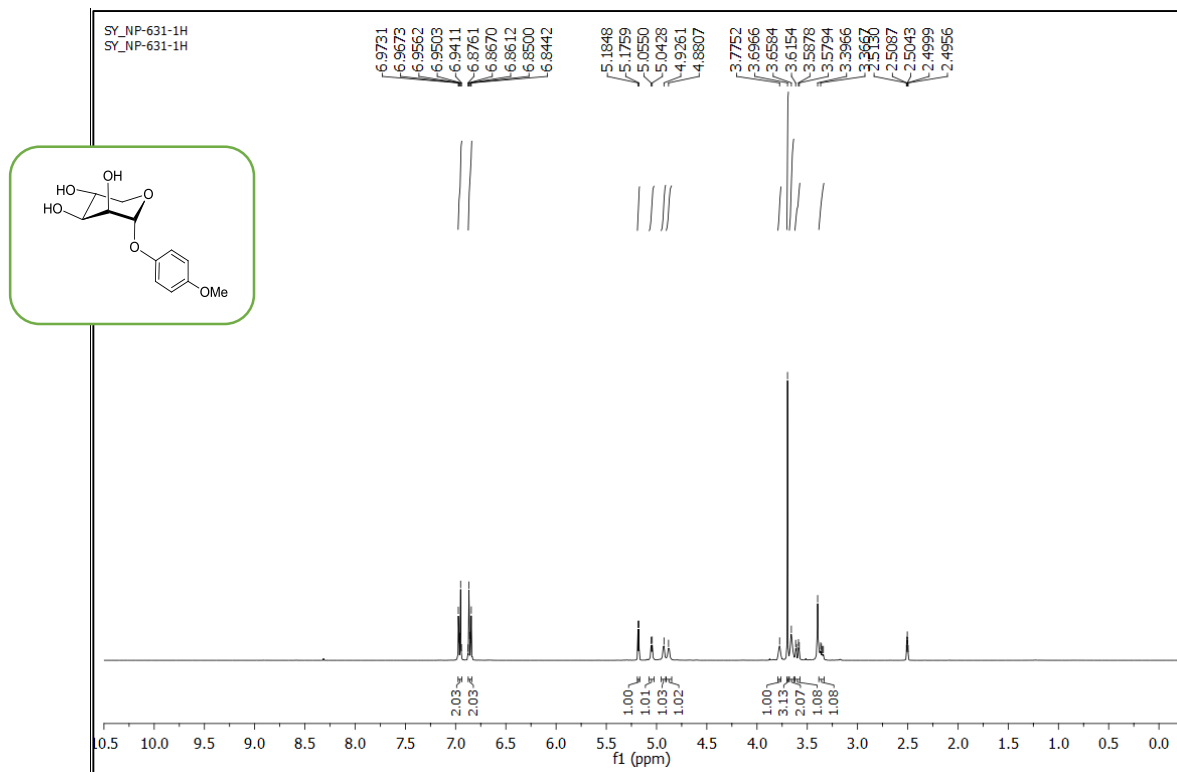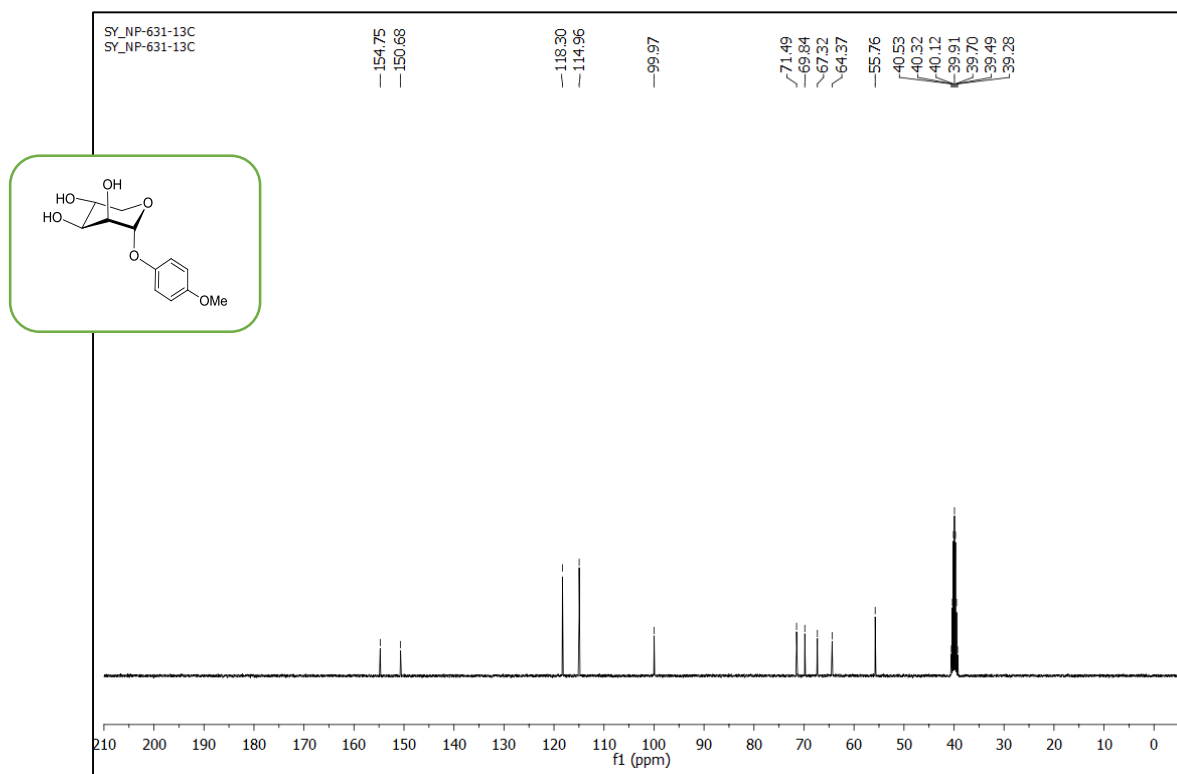

Supplement: d1ma00907a1.pdf [file d1ma00907a1.pdf]
